# Supplementary material for: A novel pH-sensitive method for the quantification of Ca2+ ions by complexometric titration with Na3HEDTA
Source: Royal Society of Chemistry journal article supplement (doi:10.1039/d4ay00782d), 2024-01-01

---

The following ALERTS were generated. Each ALERT has the format

**test-name\_ALERT\_alert-type\_alert-level.**

Click on the hyperlinks for more details of the test.

---

### Alert level B

|                   |                                          |               |       |              |
|-------------------|------------------------------------------|---------------|-------|--------------|
| PLAT306_ALERT_2_B | Isolated Oxygen Atom (H-atoms Missing ?) | .....         | 001C  | Check        |
| PLAT306_ALERT_2_B | Isolated Oxygen Atom (H-atoms Missing ?) | .....         | 001M  | Check        |
| PLAT417_ALERT_2_B | Short Inter D-H..H-D                     | H00B ..H00R . | 1.86  | Ang.         |
|                   |                                          | 1-x,1-y,1-z = | 2_666 | Check        |
| PLAT420_ALERT_2_B | D-H Bond Without Acceptor                | O00T --H00R . |       | Please Check |
| PLAT430_ALERT_2_B | Short Inter D...A Contact                | O006 ..001C . | 2.82  | Ang.         |
|                   |                                          | 1-x,1-y,1-z = | 2_666 | Check        |

---

### Alert level C

ABSTY02\_ALERT\_1\_C An \_exptl\_absorpt\_correction\_type has been given without a literature citation. This should be contained in the \_exptl\_absorpt\_process\_details field.  
Absorption correction given as multi-scan

DIFMX02\_ALERT\_1\_C The maximum difference density is > 0.1\*ZMAX\*0.75  
The relevant atom site should be identified.

THETM01\_ALERT\_3\_C The value of sine(theta\_max)/wavelength is less than 0.590  
Calculated sin(theta\_max)/wavelength = 0.5753

PLAT029\_ALERT\_3\_C \_diffn\_measured\_fraction\_theta\_full value Low . 0.973 Why?

PLAT094\_ALERT\_2\_C Ratio of Maximum / Minimum Residual Density ... 2.91 Report

PLAT097\_ALERT\_2\_C Large Reported Max. (Positive) Residual Density 1.78 eA-3

PLAT112\_ALERT\_2\_C ADDSYM Detects New (Pseudo) Symm. Elem I 89 %Fit

PLAT220\_ALERT\_2\_C NonSolvent Resd 1 O Ueq(max)/Ueq(min) Range 4.9 Ratio

PLAT222\_ALERT\_3\_C NonSolvent Resd 1 H Uiso(max)/Uiso(min) Range 5.6 Ratio

PLAT242\_ALERT\_2\_C Low 'MainMol' Ueq as Compared to Neighbors of Ca04 Check

PLAT260\_ALERT\_2\_C Large Average Ueq of Residue Including 001M 0.147 Check

PLAT411\_ALERT\_2\_C Short Inter H...H Contact H01F ..H01F . 2.08 Ang.  
2-x,2-y,2-z = 2\_777 Check

PLAT767\_ALERT\_4\_C INS Embedded LIST 6 Instruction Should be LIST 4 Please Check

PLAT906\_ALERT\_3\_C Large K Value in the Analysis of Variance ..... 2.048 Check

PLAT911\_ALERT\_3\_C Missing FCF Refl Between Thmin & STh/L= 0.575 167 Report

PLAT913\_ALERT\_3\_C Missing # of Very Strong Reflections in FCF .... 34 Note

PLAT971\_ALERT\_2\_C Check Calcd Resid. Dens. 1.89Ang From O01E 1.70 eA-3

PLAT975\_ALERT\_2\_C Check Calcd Resid. Dens. 0.86Ang From O00Z . 0.68 eA-3

PLAT975\_ALERT\_2\_C Check Calcd Resid. Dens. 0.58Ang From O01M . 0.66 eA-3

PLAT976\_ALERT\_2\_C Check Calcd Resid. Dens. 0.48Ang From O01M . -0.58 eA-3

PLAT976\_ALERT\_2\_C Check Calcd Resid. Dens. 0.52Ang From O01C . -0.48 eA-3

PLAT976\_ALERT\_2\_C Check Calcd Resid. Dens. 0.74Ang From O00M . -0.45 eA-3

PLAT976\_ALERT\_2\_C Check Calcd Resid. Dens. 0.75Ang From O00V . -0.42 eA-3

PLAT976\_ALERT\_2\_C Check Calcd Resid. Dens. 0.62Ang From O00T . -0.41 eA-3

PLAT976\_ALERT\_2\_C Check Calcd Resid. Dens. 0.66Ang From O01E . -0.41 eA-3

PLAT977\_ALERT\_2\_C Check Negative Difference Density on H00E . -0.36 eA-3

PLAT977\_ALERT\_2\_C Check Negative Difference Density on H00T . -0.32 eA-3

---

### Alert level G

|                   |                                                  |  |      |        |
|-------------------|--------------------------------------------------|--|------|--------|
| PLAT004_ALERT_5_G | Polymeric Structure Found with Maximum Dimension |  | 2    | Info   |
| PLAT007_ALERT_5_G | Number of Unrefined Donor-H Atoms .....          |  | 24   | Report |
| PLAT083_ALERT_2_G | SHELXL Second Parameter in WGHT Unusually Large  |  | 5.06 | Why ?  |

|                   |                                                  |              |
|-------------------|--------------------------------------------------|--------------|
| PLAT154_ALERT_1_G | The s.u.'s on the Cell Angles are Equal ..(Note) | 0.002 Degree |
| PLAT720_ALERT_4_G | Number of Unusual/Non-Standard Labels .....      | 105 Note     |
| PLAT764_ALERT_4_G | Overcomplete CIF Bond List Detected (Rep/Expd) . | 1.10 Ratio   |
| PLAT774_ALERT_1_G | Check X-Y Bond in CIF: Ca01 --Ca01 ..            | 4.03 Ang.    |
| PLAT774_ALERT_1_G | Check X-Y Bond in CIF: Ca02 --Ca04 ..            | 4.43 Ang.    |
| PLAT774_ALERT_1_G | Check X-Y Bond in CIF: Ca03 --Ca04 ..            | 4.06 Ang.    |
| PLAT779_ALERT_4_G | Suspect or Irrelevant (Bond) Angle(s) in CIF ... | 37.17 Deg.   |
|                   | 0009 -C01F -CA01 1_555 1_555 1_555 .....         | # 400 Check  |
| PLAT883_ALERT_1_G | No Info/Value for _atom_sites_solution_primary . | Please Do !  |
| PLAT909_ALERT_3_G | Percentage of I>2sig(I) Data at Theta(Max) Still | 90% Note     |
| PLAT933_ALERT_2_G | Number of HKL-OMIT Records in Embedded .res File | 18 Note      |
| PLAT965_ALERT_2_G | The SHELXL WEIGHT Optimisation has not Converged | Please Check |
| PLAT967_ALERT_5_G | Note: Two-Theta Cutoff Value in Embedded .res .. | 125.0 Degree |
| PLAT978_ALERT_2_G | Number C-C Bonds with Positive Residual Density. | 2 Info       |
| PLAT982_ALERT_1_G | The C-f' = 0.0192 Deviates from IT-value =       | 0.0181 Check |
| PLAT982_ALERT_1_G | The Ca-f' = 0.3660 Deviates from IT-value =      | 0.3641 Check |
| PLAT982_ALERT_1_G | The N-f' = 0.0330 Deviates from IT-value =       | 0.0311 Check |
| PLAT982_ALERT_1_G | The O-f' = 0.0517 Deviates from IT-value =       | 0.0492 Check |
| PLAT983_ALERT_1_G | The Ca-f" = 1.2937 Deviates from IT-Value =      | 1.2855 Check |
| PLAT983_ALERT_1_G | The O-f" = 0.0336 Deviates from IT-Value =       | 0.0322 Check |

---

0 **ALERT level A** = Most likely a serious problem - resolve or explain  
5 **ALERT level B** = A potentially serious problem, consider carefully  
27 **ALERT level C** = Check. Ensure it is not caused by an omission or oversight  
22 **ALERT level G** = General information/check it is not something unexpected

13 ALERT type 1 CIF construction/syntax error, inconsistent or missing data  
27 ALERT type 2 Indicator that the structure model may be wrong or deficient  
7 ALERT type 3 Indicator that the structure quality may be low  
4 ALERT type 4 Improvement, methodology, query or suggestion  
3 ALERT type 5 Informative message, check

---

It is advisable to attempt to resolve as many as possible of the alerts in all categories. Often the minor alerts point to easily fixed oversights, errors and omissions in your CIF or refinement strategy, so attention to these fine details can be worthwhile. In order to resolve some of the more serious problems it may be necessary to carry out additional measurements or structure refinements. However, the purpose of your study may justify the reported deviations and the more serious of these should normally be commented upon in the discussion or experimental section of a paper or in the "special\_details" fields of the CIF. checkCIF was carefully designed to identify outliers and unusual parameters, but every test has its limitations and alerts that are not important in a particular case may appear. Conversely, the absence of alerts does not guarantee there are no aspects of the results needing attention. It is up to the individual to critically assess their own results and, if necessary, seek expert advice.

### **Publication of your CIF in IUCr journals**

A basic structural check has been run on your CIF. These basic checks will be run on all CIFs submitted for publication in IUCr journals (*Acta Crystallographica*, *Journal of Applied Crystallography*, *Journal of Synchrotron Radiation*); however, if you intend to submit to *Acta Crystallographica Section C* or *E* or *IUCrData*, you should make sure that full publication checks are run on the final version of your CIF prior to submission.

### **Publication of your CIF in other journals**

Please refer to the *Notes for Authors* of the relevant journal for any special instructions relating to CIF submission.

Datablock 1 - ellipsoid plot

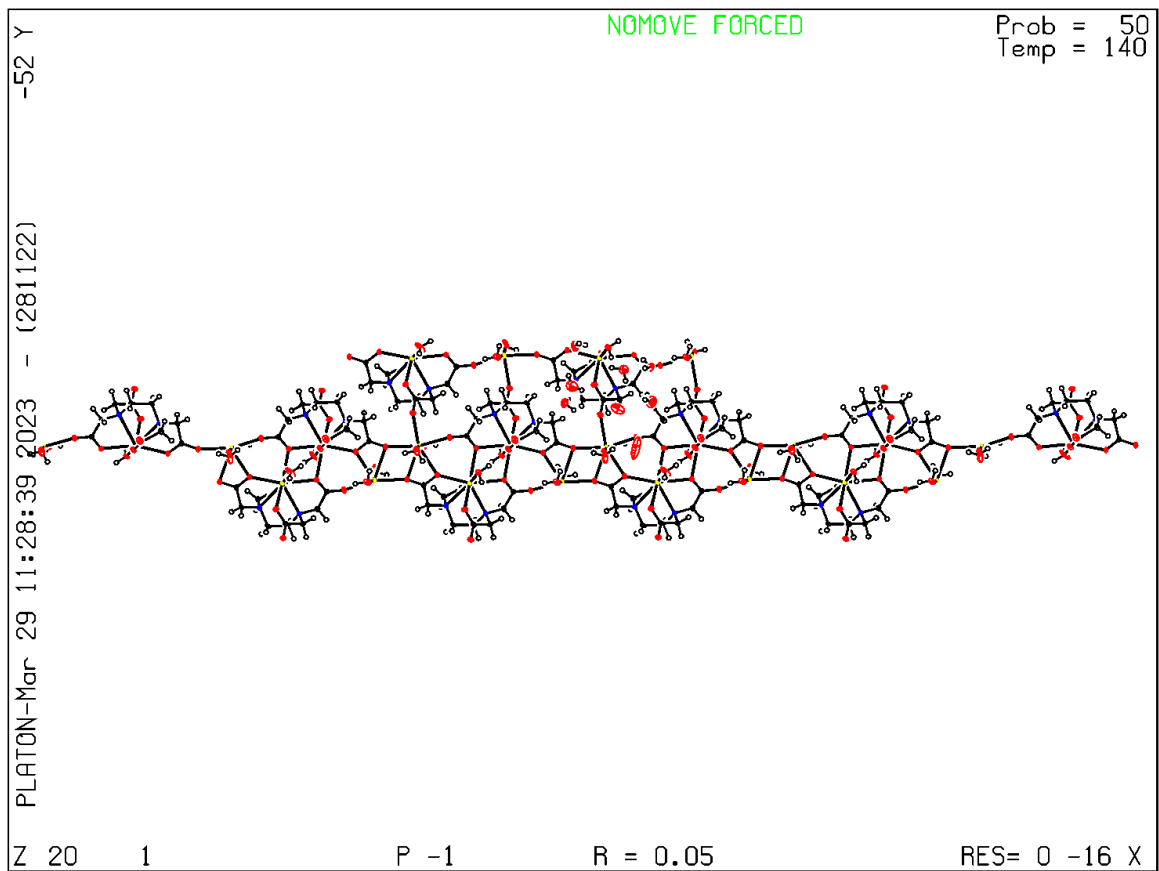

Supplement: d4ay00782d2.pdf [file d4ay00782d2.pdf]
