# Supplementary material for: A novel pH-sensitive method for the quantification of Ca2+ ions by complexometric titration with Na3HEDTA
Source: Royal Society of Chemistry journal article supplement (doi:10.1039/d4ay00782d), 2024-01-01
Supplement: d4ay00782d3.pdf [file d4ay00782d3.pdf]

=====

S U P P L E M E N T A R Y   M A T E R I A L

=====

## **A Novel pH-Sensitive Method for the Quantification of Ca<sup>+2</sup> Ions by Complexometric Titration with Na<sub>3</sub>HEDTA**

Rahul Bhochiya,<sup>a</sup> Pradip Kumar Mondal,<sup>b</sup> Shah Jaimin Balkrishna<sup>\*a</sup>

<sup>a</sup> Department of Chemistry, Government Commerce and Science College Dahej, Bharuch, Gujarat 392  
130, India (Affiliated with Veer Narmad South Gujarat University, Surat, Gujarat, India)

<sup>b</sup> Elettra Sincrotrone Trieste, S.S. 14 Km 163.5 in Area Science Park, 34149 Basovizza Trieste, Italy

*[jaiminshah02@gail.com](mailto:jaiminshah02@gail.com)*

### **Contents**

| <b>Experiment No.</b> | <b>Description of Experiment</b>                                                                                                                                                             | <b>Page No.</b> |
|-----------------------|----------------------------------------------------------------------------------------------------------------------------------------------------------------------------------------------|-----------------|
| 01                    | pH-Metric estimation of Ca <sup>+2</sup> with Aq. Na <sub>2</sub> H <sub>2</sub> EDTA                                                                                                        | 05-07           |
| 02                    | pH-Metric estimation of Ca <sup>+2</sup> with Aq. Na <sub>3</sub> HEDTA (Stock solution prepared from 37.5 mg CaCO <sub>3</sub> )                                                            | 08-10           |
| 03                    | Estimation of Ca <sup>+2</sup> with conventional complexometric technique (Stock solution prepared from 37.5 mg CaCO <sub>3</sub> )                                                          | 11-12           |
| 04                    | Gravimetric Estimation of Ca <sup>+2</sup> as CaC <sub>2</sub> O <sub>4</sub> .H <sub>2</sub> O (Stock solution of Calcium Carbonate was prepared by digesting 37.5 mg of Calcium Carbonate) | 12-13           |
| 05                    | pH-Metric estimation of Ca <sup>+2</sup> with Aq. Na <sub>3</sub> HEDTA (Stock solution prepared from 75.0 mg CaCO <sub>3</sub> )                                                            | 13-16           |
| 06                    | Estimation of Ca <sup>+2</sup> with conventional complexometric technique (Stock solution prepared from 75.0 mg CaCO <sub>3</sub> )                                                          | 17-18           |
| 07                    | Gravimetric Estimation of Ca <sup>+2</sup> as CaC <sub>2</sub> O <sub>4</sub> .H <sub>2</sub> O (Stock solution of Calcium Carbonate was prepared by digesting 75.0 mg of Calcium Carbonate) | 18-19           |
| 08                    | pH-Metric estimation of Ca <sup>+2</sup> with Aq. Na <sub>3</sub> HEDTA (Stock                                                                                                               | 19-23           |

|    |                                                                                                                                                                                              |       |
|----|----------------------------------------------------------------------------------------------------------------------------------------------------------------------------------------------|-------|
|    | solution prepared from 112.5 mg CaCO <sub>3</sub> )                                                                                                                                          |       |
| 09 | Estimation of Ca <sup>+2</sup> with conventional complexometric technique (Stock solution prepared from 112.5 mg CaCO <sub>3</sub> )                                                         | 23-24 |
| 10 | Gravimetric Estimation of Ca <sup>+2</sup> as CaC <sub>2</sub> O <sub>4</sub> .H <sub>2</sub> O (Stock solution of Calcium Carbonate was prepared by digesting 112.5 mg of Calcium Carbonate | 24-25 |
| 11 | pH-Metric estimation of Ca <sup>+2</sup> with Aq. Na <sub>3</sub> HEDTA (Stock solution prepared from 46.2 mg white marble stone powder)                                                     | 26-28 |
| 12 | Estimation of Ca <sup>+2</sup> with conventional complexometric technique (Stock solution prepared from 46.2 mg white marble stone powder)                                                   | 29-30 |
| 13 | Gravimetric estimation of Ca <sup>+2</sup> as CaC <sub>2</sub> O <sub>4</sub> .H <sub>2</sub> O (Stock solution prepared from 46.2 mg white marble stone powder)                             | 30-31 |
| 14 | pH-Metric estimation of Ca <sup>+2</sup> with Aq. Na <sub>3</sub> HEDTA (Stock solution prepared from 49.7 mg egg shell powder)                                                              | 31-34 |
| 15 | Estimation of Ca <sup>+2</sup> with conventional complexometric technique (Stock solution prepared from 49.7 mg egg shell powder)                                                            | 34-35 |
| 16 | Gravimetric estimation of Ca <sup>+2</sup> as CaC <sub>2</sub> O <sub>4</sub> .H <sub>2</sub> O (Stock solution prepared from 49.7 mg egg shell powder)                                      | 35-36 |
| 17 | pH-Metric estimation of Ca <sup>+2</sup> with Aq. Na <sub>3</sub> HEDTA (Stock solution prepared from 41.7 mg sea shell powder)                                                              | 36-39 |
| 18 | Estimation of Ca <sup>+2</sup> with conventional complexometric technique (Stock solution prepared from 41.7 mg sea shell powder)                                                            | 39-40 |
| 19 | Gravimetric estimation of Ca <sup>+2</sup> as CaC <sub>2</sub> O <sub>4</sub> .H <sub>2</sub> O (Stock solution prepared from 41.7 mg sea shell powder)                                      | 40-41 |
| 20 | pH-Metric estimation of Ca <sup>+2</sup> with Aq. Na <sub>3</sub> HEDTA (Stock solution prepared from 49.7 mg calcium tablet powder)                                                         | 41-44 |
| 21 | Estimation of Ca <sup>+2</sup> with conventional complexometric technique (Stock solution prepared from 49.7 mg calcium tablet powder)                                                       | 44-45 |
| 22 | Gravimetric estimation of Ca <sup>+2</sup> as CaC <sub>2</sub> O <sub>4</sub> .H <sub>2</sub> O (Stock solution prepared from 49.7 mg calcium tablet powder)                                 | 45-46 |
| 23 | pH-Metric estimation of Ca <sup>+2</sup> with Aq. Na <sub>3</sub> HEDTA (Stock solution prepared from 5.0 mg CaCO <sub>3</sub> ) [Minimum detection limit                                    | 46-47 |

|    |                                                                                                                                                                                     |       |
|----|-------------------------------------------------------------------------------------------------------------------------------------------------------------------------------------|-------|
|    | determination]                                                                                                                                                                      |       |
| 24 | pH-Metric estimation of $\text{Ca}^{+2}$ with Aq. $\text{Na}_4\text{EDTA}$                                                                                                          | 48-50 |
| 25 | Volumetric titration of $\text{Ca}^{+2}$ with Aq. $\text{Na}_3\text{HEDTA}$ by using bromothymol blue as indicator (Stock solution prepared from 37.5 mg $\text{CaCO}_3$ )          | 50-52 |
| 26 | Volumetric titration of $\text{Ca}^{+2}$ with Aq. $\text{Na}_3\text{HEDTA}$ by using bromothymol blue as indicator (Stock solution prepared from 50.0 mg white marble stone powder) | 52-54 |
| 27 | Estimation of $\text{Ca}^{+2}$ with conventional complexometric technique (Stock solution prepared from 50.0 mg white marble stone powder)                                          | 55-56 |
| 28 | Gravimetric analysis of $\text{Ca}^{+2}$ as $\text{CaC}_2\text{O}_4 \cdot \text{H}_2\text{O}$ (Stock solution prepared from 50.0 mg white marble stone powder)                      | 56-57 |
| 29 | Volumetric titration of $\text{Ca}^{+2}$ with Aq. $\text{Na}_3\text{HEDTA}$ by using bromothymol blue as indicator (Stock solution prepared from 42.0 mg egg shell powder)          | 57-59 |
| 30 | Estimation of $\text{Ca}^{+2}$ with conventional complexometric technique (Stock solution prepared from 42.0 mg egg shell powder)                                                   | 59-60 |
| 31 | Gravimetric analysis of $\text{Ca}^{+2}$ as $\text{CaC}_2\text{O}_4 \cdot \text{H}_2\text{O}$ (Stock solution prepared from 42.0 mg egg shell powder)                               | 60-61 |
| 32 | Volumetric titration of $\text{Ca}^{+2}$ with Aq. $\text{Na}_3\text{HEDTA}$ by using bromothymol blue as indicator (Stock solution prepared from 48.0 mg sea shell powder)          | 61-63 |
| 33 | Estimation of $\text{Ca}^{+2}$ with conventional complexometric technique (Stock solution prepared from 48.0 mg sea shell powder)                                                   | 63-64 |
| 34 | Gravimetric analysis of $\text{Ca}^{+2}$ as $\text{CaC}_2\text{O}_4 \cdot \text{H}_2\text{O}$ (Stock solution prepared from 48.0 mg sea shell powder)                               | 65-66 |
| 35 | Volumetric titration of $\text{Ca}^{+2}$ with Aq. $\text{Na}_3\text{HEDTA}$ by using bromothymol blue as indicator (Stock solution prepared from 40.0 mg calcium tablet powder)     | 66-68 |
| 36 | Estimation of $\text{Ca}^{+2}$ with conventional complexometric technique (Stock solution prepared from 40.0 mg calcium tablet powder)                                              | 68-69 |
| 37 | Gravimetric analysis of $\text{Ca}^{+2}$ as $\text{CaC}_2\text{O}_4 \cdot \text{H}_2\text{O}$ (Stock solution                                                                       | 69-70 |

|    |                                                                                                                                                                                                            |       |
|----|------------------------------------------------------------------------------------------------------------------------------------------------------------------------------------------------------------|-------|
|    | prepared from 40.0 mg calcium tablet powder)                                                                                                                                                               |       |
| 38 | pH-Metric estimation of $\text{Li}^+$ with Aq. $\text{Na}_3\text{HEDTA}$ (Stock solution prepared from 55.0 mg $\text{Li}_2\text{CO}_3$ )                                                                  | 70-72 |
| 39 | pH-Metric estimation of $\text{Na}^+$ with Aq. $\text{Na}_3\text{HEDTA}$ (Stock solution prepared from 29.2 mg $\text{NaCl}$ )                                                                             | 72-74 |
| 40 | pH-Metric estimation of $\text{K}^+$ with Aq. $\text{Na}_3\text{HEDTA}$ (Stock solution prepared from 37.2 mg $\text{KCl}$ )                                                                               | 74-76 |
| 41 | pH-Metric estimation of $(\text{Ca}^{+2} + \text{Mg}^{+2})$ with Aq. $\text{Na}_3\text{HEDTA}$ (Stock solution prepared from 37.5 mg $\text{CaCO}_3$ + 29.8 mg $\text{MgCO}_3$ )                           | 76-79 |
| 42 | pH-Metric estimation of $(\text{Ca}^{+2} + \text{Ba}^{+2})$ with Aq. $\text{Na}_3\text{HEDTA}$ (Stock solution prepared from 37.5 mg $\text{CaCO}_3$ + 49.0 mg $\text{BaCO}_3$ )                           | 79-82 |
| 43 | pH-Metric estimation of $(\text{Ca}^{+2} + \text{Sr}^{+2})$ with Aq. $\text{Na}_3\text{HEDTA}$ (Stock solution prepared from 37.5 mg $\text{CaCO}_3$ + 50.0 mg $\text{SrCl}_2 \cdot 6\text{H}_2\text{O}$ ) | 82-85 |
|    | Simulated titration curve and related calculations                                                                                                                                                         | 85-89 |
|    | Uncertainty calculation for pH-Metric analysis                                                                                                                                                             | 90-91 |
|    | References                                                                                                                                                                                                 | 92    |

## Experimental Section

Calcium Carbonate ( $\text{CaCO}_3$ ), disodium salt of EDTA ( $\text{Na}_2\text{H}_2\text{EDTA}$ ) and bromothymol blue indicator solution were purchased from Loba Chemie. Hydrochloric acid (HCl) and Sodium Hydroxide (NaOH) were purchased from Finar. Eriochrome Black –T (EBT) indicator was purchased from Finar and freshly prepared just before the experiment by dissolving 0.4 g EBT in 10.0 mL ethanol and 30.0 mL triethanolamine. Buffer solution having pH 10 was prepared by mixing 68.0 g  $\text{NH}_4\text{Cl}$ , 568.0 mL liquor ammonia and 364.0 mL water. Aqueous solutions in all the experiments were prepared by using Bisleri packaged drinking water. Marble stone, egg shells and sea shells were thoroughly washed, dried and grinded to have homogeneous powder. Calcium tablets (Caldison-500, Unison Pharmaceuticals Pvt. Ltd) were purchased from local market (Batch No. 220910770, Manufacturing Date: Sept 2022, Expiry Date: August 2024). All the pH-Metric experiments were conducted on digital pH meter (Brand: Digitronics, Model: 213) having pH range of 0-14 and resolution 0.01 unit of pH. Combined glass electrode Digitronics CE24 was used. The inner reference electrode is Ag/AgCl electrode in 3 mol/L KCl solution with porous liquid junction. pH electrode was calibrated with the use of buffer solutions having pH 4.00, pH 7.00 and pH 9.00 before each new experiment. All the pH-Metric titrations and volumetric analysis with bromothymol blue were performed with three sets of solutions and three experiments were performed with each set of solution in order to check the reproducibility of results.

**1) pH-Metric Estimation of Calcium as Calcium Carbonate ( $\text{CaCO}_3$ ) by using Aq.**

**Solution of  $\text{Ca}^{+2}$  (pH 7) as titrand and Aq. Solution of  $\text{Na}_2\text{H}_2\text{EDTA}$  (pH 4.4) as titrant**  
0.0375 g  $\text{CaCO}_3$  was dissolved in 0.1 mL 11.3N HCl. It was transferred to a 250.0 mL standard volumetric flask and diluted up to the mark with water. Solution was shaken well to make it homogeneous (**Solution A**). Then, 50.0 mL of Solution A was transferred to a 100.0 mL beaker. Then, pH electrode was inserted to this solution and pH value was found to be 2.5. pH of this solution was adjusted to 7 by adding 2.0 mL 0.33 M NaOH solution (**Solution B**). 0.01M

Na<sub>2</sub>H<sub>2</sub>EDTA solution was filled in 25.0 mL burette. Now, 0.5 mL 0.01M Na<sub>2</sub>H<sub>2</sub>EDTA was added to Solution B having pH 7. Solution was shaken well with the help of glass rod and then pH reading was measured. Same process was repeated by adding 0.5 mL 0.01M Na<sub>2</sub>H<sub>2</sub>EDTA from burette up to 12.0 mL and pH reading was measured after each 0.5 mL addition of burette solution. Obtained readings and graph are described below.

**Table 1: pH-Metric Titration Readings between Aq. Solutions of Ca<sup>+2</sup> and Na<sub>2</sub>H<sub>2</sub>EDTA**

| Sr. No. | Volume of 0.01M Na <sub>2</sub> H <sub>2</sub> EDTA (in mL) | pH   |
|---------|-------------------------------------------------------------|------|
| 1       | 0.0                                                         | 7.05 |
| 2       | 0.5                                                         | 6.49 |
| 3       | 1.0                                                         | 5.95 |
| 4       | 1.5                                                         | 5.20 |
| 5       | 2.0                                                         | 4.52 |
| 6       | 2.5                                                         | 4.32 |
| 7       | 3.0                                                         | 4.19 |
| 8       | 3.5                                                         | 4.11 |
| 9       | 4.0                                                         | 4.03 |
| 10      | 4.5                                                         | 4.00 |
| 11      | 5.0                                                         | 3.98 |
| 12      | 5.5                                                         | 3.95 |
| 13      | 6.0                                                         | 3.92 |
| 14      | 6.5                                                         | 3.90 |
| 15      | 7.0                                                         | 3.89 |
| 16      | 7.5                                                         | 3.87 |

|    |      |      |
|----|------|------|
| 17 | 8.0  | 3.84 |
| 18 | 8.5  | 3.82 |
| 19 | 9.0  | 3.80 |
| 20 | 9.5  | 3.79 |
| 21 | 10.0 | 3.77 |
| 22 | 10.5 | 3.75 |
| 23 | 11.0 | 3.74 |
| 24 | 11.5 | 3.73 |
| 25 | 12.0 | 3.72 |

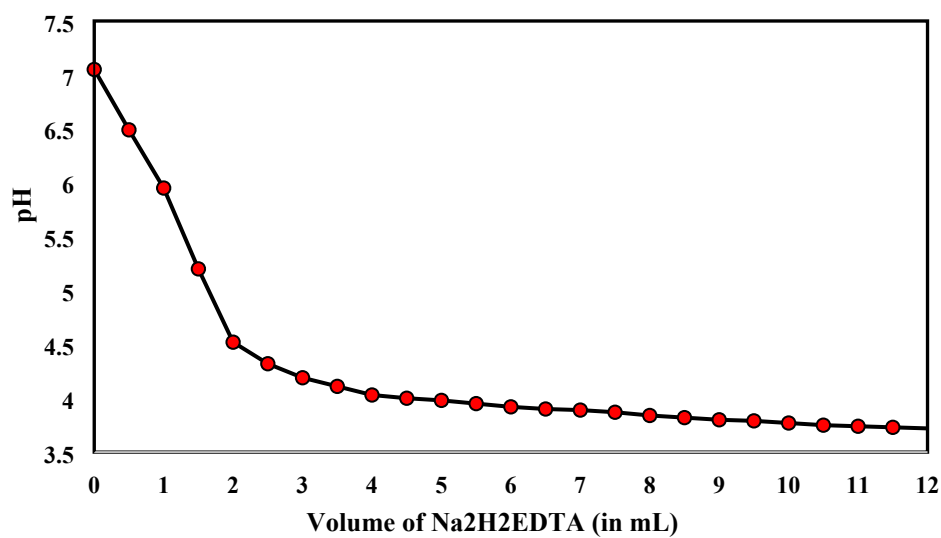

**Figure 1:** Effect of Aq. Na<sub>2</sub>H<sub>2</sub>EDTA Addition on pH of Ca<sup>+2</sup> Solution

**Observations:** Initially, decrease in pH was observed with the progress of titration, but even after passing the stage of equivalence point, a constant small decrease in pH was observed and hence we could not find out the exact & sharp equivalence point. It may be because of weak acidic nature of Aq. Na<sub>2</sub>H<sub>2</sub>EDTA solution.

**2) pH-Metric Estimation of Calcium as Calcium Carbonate (CaCO<sub>3</sub>) by using Aq. Solution of Ca<sup>+2</sup> (pH 7) as titrand and Aq. Solution of Na<sub>3</sub>HEDTA (pH 11) as titrant (Stock solution of CaCO<sub>3</sub> was prepared by dissolving 37.5 mg of CaCO<sub>3</sub>)**

0.0375 g CaCO<sub>3</sub> was dissolved in 0.1 mL 11.3N HCl. It was transferred to a 250.0 mL standard volumetric flask and diluted up to the mark with water. Solution was shaken well to make it homogeneous (**Solution A**). Then, 50.0 mL of Solution A was transferred to a 100.0 mL beaker. Then, pH electrode was inserted to this solution and pH value was found to be 2.5. pH of this solution was adjusted to 7 by adding 2.0 mL 0.33 M NaOH solution (**Solution B**). Aqueous solution of 0.01M Na<sub>3</sub>HEDTA (pH 11) was prepared by mixing 250.0 mL 0.01M Na<sub>2</sub>H<sub>2</sub>EDTA and 15.0 mL 0.33M NaOH solutions. This solution was filled in 25.0 mL burette as titrant. Then, 0.5 mL 0.01M Na<sub>3</sub>HEDTA was added to Solution B having pH 7. Solution was shaken well with the help of glass rod and then pH reading was measured. Same process was repeated by adding 0.5 mL 0.01M Na<sub>3</sub>HEDTA from burette up to 12.0 mL and pH reading was measured after each 0.5 mL addition of burette solution. Obtained readings and graph are described below.

**Table 2: pH-Metric Titration Readings between Aq. Solutions of Ca<sup>+2</sup> and Na<sub>3</sub>HEDTA**

| <b>Sr. No.</b> | <b>Volume of 0.01M Na<sub>3</sub>HEDTA (in mL)</b> | <b>pH</b> |
|----------------|----------------------------------------------------|-----------|
| 1              | 0.0                                                | 7.06      |
| 2              | 0.5                                                | 6.99      |
| 3              | 1.0                                                | 6.94      |
| 4              | 1.5                                                | 6.86      |
| 5              | 2.0                                                | 6.79      |
| 6              | 2.5                                                | 6.73      |
| 7              | 3.0                                                | 6.68      |



|           |            |             |
|-----------|------------|-------------|
| 8         | 3.5        | 6.62        |
| 9         | 4.0        | 6.56        |
| 10        | 4.5        | 6.50        |
| 11        | 5.0        | 6.44        |
| 12        | 5.5        | 6.39        |
| 13        | 6.0        | 6.34        |
| 14        | 6.5        | 6.31        |
| 15        | 7.0        | 6.28        |
| <b>16</b> | <b>7.5</b> | <b>6.24</b> |
| 17        | 8.0        | 7.15        |
| 18        | 8.5        | 7.79        |
| 19        | 9.0        | 8.39        |
| 20        | 9.5        | 9.39        |
| 21        | 10.0       | 9.70        |
| 22        | 10.5       | 10.02       |
| 23        | 11.0       | 10.12       |
| 24        | 11.5       | 10.28       |
| 25        | 12.0       | 10.34       |

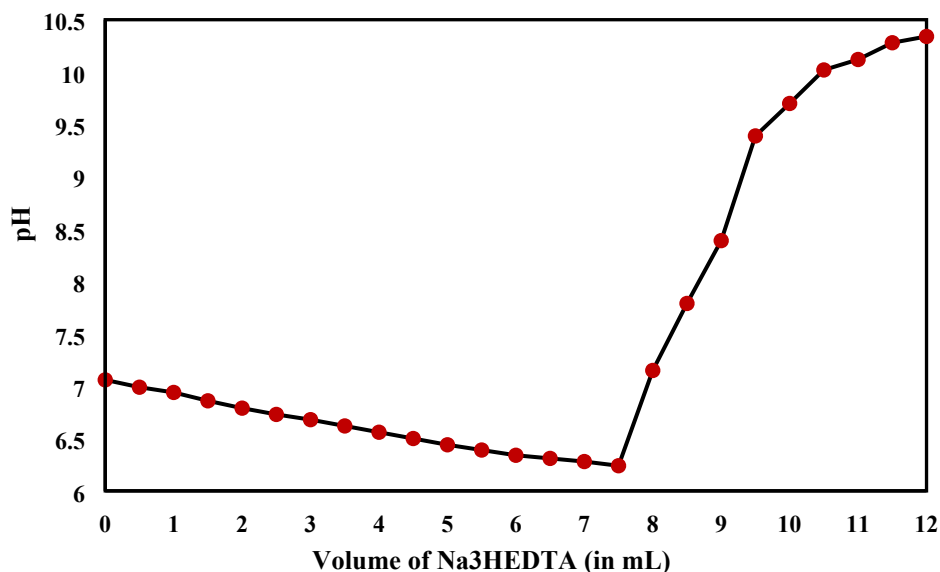

**Figure 2:** Effect of Aq.Na<sub>3</sub>HEDTA Addition on pH of Ca<sup>+2</sup> Solution

**Observations:** During this titration, formation of Ca-EDTA complex and release of one H<sup>+</sup> ion was taking place and hence decrease in pH from 7.06 to 6.24 was observed. At equivalence point, release of H<sup>+</sup> ion was stopped and sharp increase in pH was observed from 6.24 to 7.15 with further 0.5 mL addition of Na<sub>3</sub>HEDTA (pH 11). Upon subsequent addition of Na<sub>3</sub>HEDTA solution, pH value of solution significantly jumped to 7.79, 8.39 and 9.39. **So sharp equivalence point for the titration was observed at 7.5 mL.**

**Theoretical Calculations:**

Solution B contains 7.5 mg of CaCO<sub>3</sub> (Theoretical Amount)

Solution A contains (7.5 x 5) = 37.5 mg of CaCO<sub>3</sub> (Theoretical Amount)

**Experimental Calculations:**

|           |                             |   |                           |   |                         |
|-----------|-----------------------------|---|---------------------------|---|-------------------------|
| 1000.0 mL | 1M Na <sub>3</sub> HEDTA    | ≡ | 100.0 g CaCO <sub>3</sub> | ≡ | 40.0 g Ca <sup>+2</sup> |
| 1000.0 mL | 0.01M Na <sub>3</sub> HEDTA | ≡ | 1.0 g CaCO <sub>3</sub>   | ≡ | 0.4 g Ca <sup>+2</sup>  |
| 1.0 mL    | 0.01M Na <sub>3</sub> HEDTA | ≡ | 1.0 mg CaCO <sub>3</sub>  | ≡ | 0.4 mg Ca <sup>+2</sup> |
| 7.5 mL    | 0.01M Na <sub>3</sub> HEDTA | ≡ | 7.5 mg CaCO <sub>3</sub>  |   |                         |

Solution B contains 7.5 mg of CaCO<sub>3</sub> (Experimental Amount)

Solution A contains (7.5 x 5) = 37.5 mg of CaCO<sub>3</sub> (Experimental Amount)

Theoretical and experimental amount for the estimation of CaCO<sub>3</sub> matches well.

**3) Estimation of Calcium as Calcium Carbonate (CaCO<sub>3</sub>) by using conventional complexometric titration method (Stock solution of CaCO<sub>3</sub> was prepared by dissolving 37.5 mg of CaCO<sub>3</sub>)**

0.0375 g CaCO<sub>3</sub> was dissolved in 0.1 mL 11.3N HCl. It was transferred to a 250.0 mL standard volumetric flask and diluted up to the mark with water. Solution was shaken well to make it homogeneous (**Solution A**). Then, 50.0 mL of Solution A was transferred to a 250.0 mL conical flask (**Solution B**). To this, 1.5 test tube (Approx. 10-12 mL) NH<sub>4</sub>OH-NH<sub>4</sub>Cl buffer (pH 10) was added. Then, 4-5 drops of Eriochrome Black-T indicator was added. Solution in the conical flask was turned wine red and it was shaken well. Aq. Solution of Na<sub>2</sub>H<sub>2</sub>EDTA was filled in 25.0 mL burette. Then, titration was performed by drop wise addition of burette solution to the conical flask. A sharp colour change from wine red to blue was observed at the end point. This experiment was repeated three times. Obtained observations are listed below.

**Table 3: Readings of complexometric titration between Aq. Solutions of Ca<sup>+2</sup> and Na<sub>2</sub>H<sub>2</sub>EDTA by using Eriochrome Black-T as indicator**

| <b>Experiment No.</b> | <b>Initial Reading (in mL)</b> | <b>Final Reading (in mL)</b> | <b>Difference (in mL)</b> | <b>Concordant Reading (in mL)</b> |
|-----------------------|--------------------------------|------------------------------|---------------------------|-----------------------------------|
| <b>1</b>              | <b>0.0</b>                     | <b>7.8</b>                   | <b>7.8</b>                | <b>7.8</b>                        |
| <b>2</b>              | <b>0.0</b>                     | <b>7.8</b>                   | <b>7.8</b>                |                                   |
| <b>3</b>              | <b>0.0</b>                     | <b>7.8</b>                   | <b>7.8</b>                |                                   |

**Theoretical Calculations:**

**Solution B contains 7.5 mg of CaCO<sub>3</sub> (Theoretical Amount)**

**Solution A contains (7.5 x 5) = 37.5 mg of CaCO<sub>3</sub> (Theoretical Amount)**

**Experimental Calculations:**

**1000.0 mL 1M Na<sub>2</sub>H<sub>2</sub>EDTA ≡ 100.0 g CaCO<sub>3</sub> ≡ 40.0 g Ca<sup>+2</sup>**

**1000.0 mL 0.01M Na<sub>2</sub>H<sub>2</sub>EDTA ≡ 1.0 g CaCO<sub>3</sub> ≡ 0.4 g Ca<sup>+2</sup>**

**1.0 mL 0.01M Na<sub>2</sub>H<sub>2</sub>EDTA ≡ 1.0 mg CaCO<sub>3</sub> ≡ 0.4 mg Ca<sup>+2</sup>**

**7.8 mL 0.01M Na<sub>2</sub>H<sub>2</sub>EDTA ≡ 7.8 mg CaCO<sub>3</sub>**

**Solution B contains 7.8 mg of CaCO<sub>3</sub> (Experimental Amount)**

**Solution A contains (7.8 x 5) = 39.0 mg of CaCO<sub>3</sub> (Experimental Amount)**

**4) Gravimetric estimation of Calcium Carbonate (Stock solution of Calcium Carbonate was prepared by digesting 37.5 mg of Calcium Carbonate Powder with 1.0 mL Con. HCl)<sup>1</sup>**

37.5 mg of calcium carbonate powder was taken in 100.0 mL beaker. To this, 1.0 mL Con. HCl was added with stirring followed by addition of 10.0 mL water. Beaker was covered with watch glass and then heated till the solution became clear and carbon dioxide expelled completely. Sides of beaker and watch glass were rinsed with distilled water and diluted up to 50.0 mL. Then, solution was heated to boiling and 2 drops of methyl red indicator was added. To this, 5.0 mL 5% ammonium oxalate solution was added. To the resulted hot solution, (1:1) ammonia solution was added drop wise and with constant stirring until the mixture became neutral (color of solution changes to yellow from red). Formed precipitates were allowed to settle without further heating for one hour. Precipitates were filtered through previously weighed Whatman filter paper 40 and washed with 0.1% ammonium oxalate solution till it became free from chloride. Precipitates were dried on metallic cone on sand bath. Weight the amount of (Precipitate + Whatmann filter paper) and subtract it from the weight of empty Whatmann filter paper. This experiment was repeated three times and the results are reported below.

| Experiment No. | Weight of Filter Paper (in g) | Weight of (Filter Paper + Precipitates) (in g) | Weight of Precipitates (in g) | Concordant Reading (in mg) |
|----------------|-------------------------------|------------------------------------------------|-------------------------------|----------------------------|
| 01             | 1.1130 g                      | 1.1676                                         | 0.0546                        | 54.6                       |
| 02             | 1.1271 g                      | 1.1817                                         | 0.0546                        |                            |
| 03             | 1.0864 g                      | 1.1415                                         | 0.0551                        |                            |

### Calculations:

1.0 mole of  $\text{CaCO}_3 \equiv 1.0$  mole of  $\text{CaC}_2\text{O}_4 \cdot \text{H}_2\text{O}$

100.0 g  $\text{CaCO}_3 \equiv 146.08$  g  $\text{CaC}_2\text{O}_4 \cdot \text{H}_2\text{O}$

0.0375 g  $\text{CaCO}_3 \equiv 0.0547$  g  $\text{CaC}_2\text{O}_4 \cdot \text{H}_2\text{O}$

**Therefore, for obtained 54.6 mg  $\text{CaC}_2\text{O}_4 \cdot \text{H}_2\text{O}$ , the equivalent amount of  $\text{CaCO}_3$  is 37.4 mg**

**5) pH-Metric Estimation of Calcium as Calcium Carbonate ( $\text{CaCO}_3$ ) by using Aq. Solution of  $\text{Ca}^{+2}$  (pH 7) as titrand and Aq. Solution of  $\text{Na}_3\text{HEDTA}$  (pH 11) as titrant (Stock solution of  $\text{CaCO}_3$  was prepared by dissolving 75.0 mg of  $\text{CaCO}_3$ )**

0.075 g  $\text{CaCO}_3$  was dissolved in 0.2 mL 11.3N HCl. It was transferred to a 250.0 mL standard volumetric flask and diluted up to the mark with water. Solution was shaken well to make it homogeneous (**Solution A**). Then, 50.0 mL of Solution A was transferred to a 100.0 mL beaker. Then, pH electrode was inserted to this solution and pH value was found to be 2.4. pH of this solution was adjusted to 7 by adding 4.0 mL 0.33 M NaOH solution (**Solution B**). Aqueous solution of 0.01M  $\text{Na}_3\text{HEDTA}$  (pH 11) was prepared by mixing 250.0 mL 0.01M  $\text{Na}_2\text{H}_2\text{EDTA}$  and 15.0 mL 0.33M NaOH solutions. This solution was filled in 25.0 mL burette as titrant. Then, 0.5 mL 0.01M  $\text{Na}_3\text{HEDTA}$  was added to Solution B having pH 7. Solution was shaken well with the help of glass rod and then pH reading was

measured. Same process was repeated by adding 0.5 mL 0.01M Na<sub>3</sub>HEDTA from burette up to 20.0 mL and pH reading was measured after each 0.5 mL addition of burette solution. Obtained readings and graph are described below.

**Table 4: pH-Metric Titration Readings between Aq. Solutions of Ca<sup>+2</sup> and Na<sub>3</sub>HEDTA**

| <b>Sr. No.</b> | <b>Volume of 0.01M Na<sub>3</sub>HEDTA (in mL)</b> | <b>pH</b> |
|----------------|----------------------------------------------------|-----------|
| 1              | 0.0                                                | 7.07      |
| 2              | 0.5                                                | 6.90      |
| 3              | 1.0                                                | 6.73      |
| 4              | 1.5                                                | 6.66      |
| 5              | 2.0                                                | 6.59      |
| 6              | 2.5                                                | 6.51      |
| 7              | 3.0                                                | 6.44      |
| 8              | 3.5                                                | 6.39      |
| 9              | 4.0                                                | 6.34      |
| 10             | 4.5                                                | 6.30      |
| 11             | 5.0                                                | 6.26      |
| 12             | 5.5                                                | 6.22      |
| 13             | 6.0                                                | 6.18      |
| 14             | 6.5                                                | 6.13      |
| 15             | 7.0                                                | 6.08      |
| 16             | 7.5                                                | 6.05      |
| 17             | 8.0                                                | 6.01      |

|           |             |             |
|-----------|-------------|-------------|
| 18        | 8.5         | 5.96        |
| 19        | 9.0         | 5.92        |
| 20        | 9.5         | 5.89        |
| 21        | 10.0        | 5.86        |
| 22        | 10.5        | 5.83        |
| 23        | 11.0        | 5.80        |
| 24        | 11.5        | 5.76        |
| 25        | 12.0        | 5.71        |
| 26        | 12.5        | 5.68        |
| 27        | 13.0        | 5.65        |
| 28        | 13.5        | 5.62        |
| 29        | 14.0        | 5.60        |
| 30        | 14.5        | 5.58        |
| <b>31</b> | <b>15.0</b> | <b>5.56</b> |
| 32        | 15.5        | 5.86        |
| 33        | 16.0        | 6.12        |
| 34        | 16.5        | 6.31        |
| 35        | 17.0        | 6.57        |
| 36        | 17.5        | 6.84        |
| 37        | 18.0        | 7.09        |
| 38        | 18.5        | 7.34        |
| 39        | 19.0        | 7.72        |
| 40        | 19.5        | 8.10        |
| 41        | 20.0        | 8.38        |

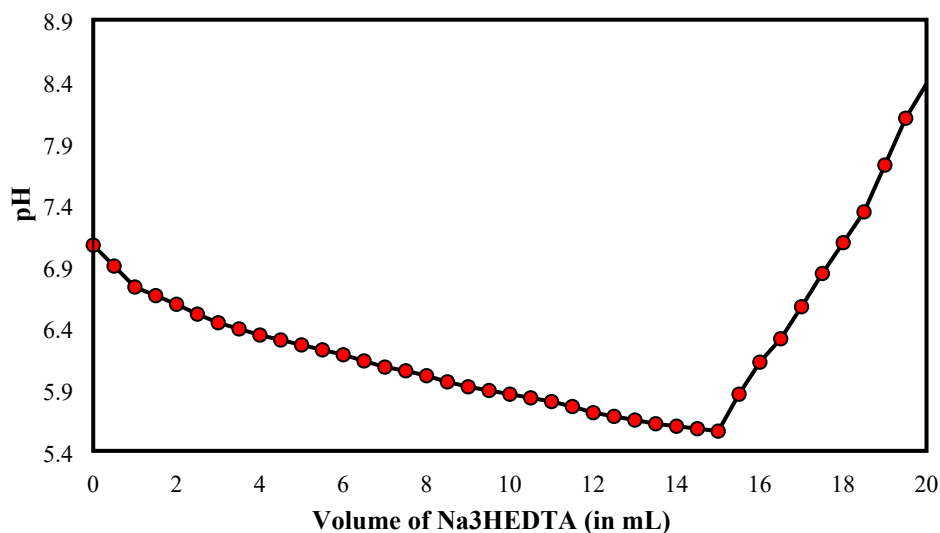

**Figure 3:** Effect of Aq.Na<sub>3</sub>HEDTA Addition on pH of Ca<sup>+2</sup> Solution

**Observations:** During this titration, formation of Ca-EDTA complex and release of one H<sup>+</sup> ion was taking place and hence decrease in pH from 7.07 to 5.56 was observed. At equivalence point, release of H<sup>+</sup> ion was stopped and sharp increase in pH was observed from 5.56 to 5.86 with further 0.5 mL addition of Na<sub>3</sub>HEDTA (pH 11). Upon subsequent addition of Na<sub>3</sub>HEDTA solution, pH value of solution significantly jumped to 6.12, 6.31 and 6.57. **So sharp equivalence point for the titration was observed at 15.0 mL.**

**Theoretical Calculations:**

Solution B contains 15.0 mg of CaCO<sub>3</sub> (Theoretical Amount)

Solution A contains (15.0 x 5) = 75.0 mg of CaCO<sub>3</sub> (Theoretical Amount)

**Experimental Calculations:**

|           |                             |   |                           |   |                         |
|-----------|-----------------------------|---|---------------------------|---|-------------------------|
| 1000.0 mL | 1M Na <sub>3</sub> HEDTA    | ≡ | 100.0 g CaCO <sub>3</sub> | ≡ | 40.0 g Ca <sup>+2</sup> |
| 1000.0 mL | 0.01M Na <sub>3</sub> HEDTA | ≡ | 1.0 g CaCO <sub>3</sub>   | ≡ | 0.4 g Ca <sup>+2</sup>  |
| 1.0 mL    | 0.01M Na <sub>3</sub> HEDTA | ≡ | 1.0 mg CaCO <sub>3</sub>  | ≡ | 0.4 mg Ca <sup>+2</sup> |
| 15.0 mL   | 0.01M Na <sub>3</sub> HEDTA | ≡ | 15.0 mg CaCO <sub>3</sub> |   |                         |

Solution B contains 15.0 mg of CaCO<sub>3</sub> (Experimental Amount)

Solution A contains (15.0 x 5) = 75.0 mg of CaCO<sub>3</sub> (Experimental Amount)



**6) Estimation of Calcium as Calcium Carbonate (CaCO<sub>3</sub>) by using conventional complexometric titration method (Stock solution of CaCO<sub>3</sub> was prepared by dissolving 75.0 mg of CaCO<sub>3</sub>)**

0.075 g CaCO<sub>3</sub> was dissolved in 0.2 mL 11.3N HCl. It was transferred to a 250.0 mL standard volumetric flask and diluted up to the mark with water. Solution was shaken well to make it homogeneous (**Solution A**). Then, 50.0 mL of Solution A was transferred to a 250.0 mL conical flask (**Solution B**). To this, 1.5 test tube (Approx. 10-12 mL) NH<sub>4</sub>OH-NH<sub>4</sub>Cl buffer (pH 10) was added. Then, 4-5 drops of Eriochrome Black-T indicator was added. Solution in the conical flask was turned wine red and it was shaken well. Aq. Solution of Na<sub>2</sub>H<sub>2</sub>EDTA was filled in 25.0 mL burette. Then, titration was performed by drop wise addition of burette solution to the conical flask. A sharp colour change from wine red to blue was observed at the end point. This experiment was repeated three times. Obtained observations are listed below.

**Table 5: Readings of complexometric titration between Aq. Solutions of Ca<sup>+2</sup> and Na<sub>2</sub>H<sub>2</sub>EDTA by using Eriochrome Black-T as indicator**

| <b>Experiment No.</b> | <b>Initial Reading (in mL)</b> | <b>Final Reading (in mL)</b> | <b>Difference (in mL)</b> | <b>Concordant Reading (in mL)</b> |
|-----------------------|--------------------------------|------------------------------|---------------------------|-----------------------------------|
| <b>1</b>              | <b>0.0</b>                     | <b>15.4</b>                  | <b>15.4</b>               | <b>15.4</b>                       |
| <b>2</b>              | <b>0.0</b>                     | <b>15.4</b>                  | <b>15.4</b>               |                                   |
| <b>3</b>              | <b>0.0</b>                     | <b>15.4</b>                  | <b>15.4</b>               |                                   |

**Theoretical Calculations:**

**Solution B contains 15.0 mg of CaCO<sub>3</sub> (Theoretical Amount)**

**Solution A contains (15.0 x 5) = 75.0 mg of CaCO<sub>3</sub> (Theoretical Amount)**

**Experimental Calculations:**

|           |                                           |   |                           |   |                         |
|-----------|-------------------------------------------|---|---------------------------|---|-------------------------|
| 1000.0 mL | 1M Na <sub>2</sub> H <sub>2</sub> EDTA    | ≡ | 100.0 g CaCO <sub>3</sub> | ≡ | 40.0 g Ca <sup>+2</sup> |
| 1000.0 mL | 0.01M Na <sub>2</sub> H <sub>2</sub> EDTA | ≡ | 1.0 g CaCO <sub>3</sub>   | ≡ | 0.4 g Ca <sup>+2</sup>  |
| 1.0 mL    | 0.01M Na <sub>2</sub> H <sub>2</sub> EDTA | ≡ | 1.0 mg CaCO <sub>3</sub>  | ≡ | 0.4 mg Ca <sup>+2</sup> |
| 15.4 mL   | 0.01M Na <sub>2</sub> H <sub>2</sub> EDTA | ≡ | 15.4 mg CaCO <sub>3</sub> |   |                         |

Solution B contains 15.4 mg of CaCO<sub>3</sub> (Experimental Amount)

Solution A contains (15.4 x 5) = 77.0 mg of CaCO<sub>3</sub> (Experimental Amount)

**7) Gravimetric Estimation of Calcium Carbonate (Stock solution of Calcium Carbonate was prepared by digesting 75.0 mg of Calcium Carbonate Powder with 2.0 mL Con. HCl)**

75.0 mg of calcium carbonate powder was taken in 100.0 mL beaker. To this, 2.0 mL Con. HCl was added with stirring followed by addition of 10.0 mL water. Beaker was covered with watch glass and then heated till the solution became clear and carbon dioxide expelled completely. Sides of beaker and watch glass were rinsed with distilled water and diluted up to 50.0 mL. Then, solution was heated to boiling and 2 drops of methyl red indicator was added. To this, 7.0 mL 5% ammonium oxalate solution was added. To the resulted hot solution, (1:1) ammonia solution was added drop wise and with constant stirring until the mixture became neutral (color of solution changes to yellow from red). Formed precipitates were allowed to settle without further heating for one hour. Precipitates were filtered through previously weighed Whatman filter paper 40 and washed with 0.1% ammonium oxalate solution till it became free from chloride. Precipitates were dried on metallic cone on sand bath. Weight the amount of (Precipitate + Whatmann filter paper) and subtract it from the weight of empty Whatmann filter paper. This experiment was repeated three times and the results are reported below.

| Experiment No. | Weight of Filter Paper (in g) | Weight of (Filter Paper + Precipitates) (in g) | Weight of Precipitates (in g) | Concordant Reading (in mg) |
|----------------|-------------------------------|------------------------------------------------|-------------------------------|----------------------------|
| 01             | 1.0683 g                      | 1.1772                                         | 0.1089                        | 108.9                      |
| 02             | 1.0878 g                      | 1.1972                                         | 0.1094                        |                            |
| 03             | 1.1292 g                      | 1.2381                                         | 0.1089                        |                            |

### Calculations:

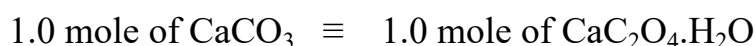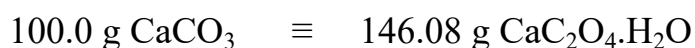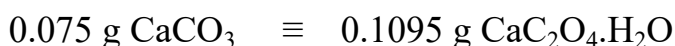

**Therefore, for obtained 108.9 mg CaC<sub>2</sub>O<sub>4</sub>·H<sub>2</sub>O, the equivalent amount of CaCO<sub>3</sub> is 74.6 mg**

- 8) pH-Metric Estimation of Calcium as Calcium Carbonate (CaCO<sub>3</sub>) by using Aq. Solution of Ca<sup>2+</sup> (pH 7) as titrand and Aq. Solution of Na<sub>3</sub>HEDTA (pH 11) as titrant (Stock solution of CaCO<sub>3</sub> was prepared by dissolving 112.5 mg of CaCO<sub>3</sub>)

0.112 g CaCO<sub>3</sub> was dissolved in 0.3 mL 11.3N HCl. It was transferred to a 250.0 mL standard volumetric flask and diluted up to the mark with water. Solution was shaken well to make it homogeneous (**Solution A**). Then, 50.0 mL of Solution A was transferred to a 100.0 mL beaker. Then, pH electrode was inserted to this solution and pH value was found to be 2.2. pH of this solution was adjusted to 7 by adding 6.0 mL 0.33 M NaOH solution (**Solution B**). Aqueous solution of 0.01M Na<sub>3</sub>HEDTA (pH 11) was prepared by mixing 250.0 mL 0.01M Na<sub>2</sub>H<sub>2</sub>EDTA and 15.0 mL 0.33M NaOH solutions. This solution was filled in 25.0 mL burette as titrant. Then, 0.5 mL 0.01M Na<sub>3</sub>HEDTA was added to Solution B having pH 7. Solution was shaken well with the help of glass rod and then pH reading was measured. Same process was repeated by adding 0.5 mL 0.01M Na<sub>3</sub>HEDTA from burette up to 25.0 mL and pH reading

was measured after each 0.5 mL addition of burette solution. Obtained readings and graph are described below.

**Table 6: pH-Metric Titration Readings between Aq. Solutions of  $\text{Ca}^{+2}$  and  $\text{Na}_3\text{HEDTA}$**

| <b>Sr. No.</b> | <b>Volume of 0.01M<br/><math>\text{Na}_3\text{HEDTA}</math> (in mL)</b> | <b>pH</b> |
|----------------|-------------------------------------------------------------------------|-----------|
| 1              | 0.0                                                                     | 7.01      |
| 2              | 0.5                                                                     | 6.97      |
| 3              | 1.0                                                                     | 6.93      |
| 4              | 1.5                                                                     | 6.92      |
| 5              | 2.0                                                                     | 6.91      |
| 6              | 2.5                                                                     | 6.90      |
| 7              | 3.0                                                                     | 6.89      |
| 8              | 3.5                                                                     | 6.88      |
| 9              | 4.0                                                                     | 6.87      |
| 10             | 4.5                                                                     | 6.86      |
| 11             | 5.0                                                                     | 6.85      |
| 12             | 5.5                                                                     | 6.84      |
| 13             | 6.0                                                                     | 6.83      |
| 14             | 6.5                                                                     | 6.82      |
| 15             | 7.0                                                                     | 6.81      |
| 16             | 7.5                                                                     | 6.80      |
| 17             | 8.0                                                                     | 6.79      |
| 18             | 8.5                                                                     | 6.78      |
| 19             | 9.0                                                                     | 6.77      |

|    |      |      |
|----|------|------|
| 20 | 9.5  | 6.75 |
| 21 | 10.0 | 6.74 |
| 22 | 10.5 | 6.73 |
| 23 | 11.0 | 6.72 |
| 24 | 11.5 | 6.70 |
| 25 | 12.0 | 6.68 |
| 26 | 12.5 | 6.67 |
| 27 | 13.0 | 6.66 |
| 28 | 13.5 | 6.65 |
| 29 | 14.0 | 6.64 |
| 30 | 14.5 | 6.61 |
| 31 | 15.0 | 6.58 |
| 32 | 15.5 | 6.56 |
| 33 | 16.0 | 6.54 |
| 34 | 16.5 | 6.52 |
| 35 | 17.0 | 6.49 |
| 36 | 17.5 | 6.46 |
| 37 | 18.0 | 6.44 |
| 38 | 18.5 | 6.42 |
| 39 | 19.0 | 6.41 |
| 40 | 19.5 | 6.39 |
| 41 | 20.0 | 6.37 |
| 42 | 20.5 | 6.35 |
| 43 | 21.0 | 6.33 |

|    |             |             |
|----|-------------|-------------|
| 44 | 21.5        | 6.31        |
| 45 | 22.0        | 6.29        |
| 46 | <b>22.5</b> | <b>6.27</b> |
| 47 | 23.0        | 6.40        |
| 48 | 23.5        | 6.65        |
| 49 | 24.0        | 6.82        |
| 50 | 24.5        | 6.95        |
| 51 | 25.0        | 7.17        |

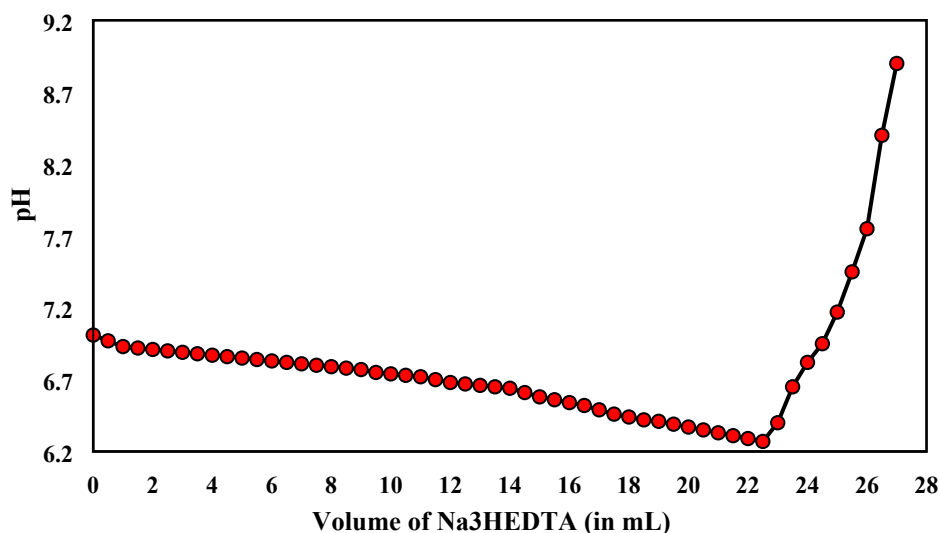

**Figure 4:** Effect of Aq.Na<sub>3</sub>HEDTA Addition on pH of Ca<sup>+2</sup> Solution

**Observations:** During this titration, formation of Ca-EDTA complex and release of one H<sup>+</sup> ion was taking place and hence decrease in pH from 7.01 to 6.27 was observed. At equivalence point, release of H<sup>+</sup> ion was stopped and sharp increase in pH was observed from 6.27 to 6.40 with further 0.5 mL addition of Na<sub>3</sub>HEDTA (pH 11). Upon subsequent addition of Na<sub>3</sub>HEDTA solution, pH value of solution significantly jumped to 6.65, 6.82 and 6.95. **So sharp equivalence point for the titration was observed at 22.5 mL**

**Theoretical Calculations:**

**Solution B contains 22.5 mg of CaCO<sub>3</sub> (Theoretical Amount)**

**Solution A contains  $(22.5 \times 5) = 112.5$  mg of  $\text{CaCO}_3$  (Theoretical Amount)**

**Experimental Calculations:**

**1000.0 mL 1M  $\text{Na}_3\text{HEDTA}$   $\equiv$  100.0 g  $\text{CaCO}_3$   $\equiv$  40.0 g  $\text{Ca}^{+2}$**

**1000.0 mL 0.01M  $\text{Na}_3\text{HEDTA}$   $\equiv$  1.0 g  $\text{CaCO}_3$   $\equiv$  0.4 g  $\text{Ca}^{+2}$**

**1.0 mL 0.01M  $\text{Na}_3\text{HEDTA}$   $\equiv$  1.0 mg  $\text{CaCO}_3$   $\equiv$  0.4 mg  $\text{Ca}^{+2}$**

**22.5 mL 0.01M  $\text{Na}_3\text{HEDTA}$   $\equiv$  22.5 mg  $\text{CaCO}_3$**

**Solution B contains 22.5 mg of  $\text{CaCO}_3$  (Experimental Amount)**

**Solution A contains  $(22.5 \times 5) = 112.5$  mg of  $\text{CaCO}_3$  (Experimental Amount)**

Theoretical and experimental amount for the estimation of  $\text{CaCO}_3$  matches well.

**9) Estimation of Calcium as Calcium Carbonate ( $\text{CaCO}_3$ ) by using conventional complexometric titration method (Stock solution of  $\text{CaCO}_3$  was prepared by dissolving 112.5 mg of  $\text{CaCO}_3$ )**

0.1125 g  $\text{CaCO}_3$  was dissolved in 0.3 mL 11.3N HCl. It was transferred to a 250.0 mL standard volumetric flask and diluted up to the mark with water. Solution was shaken well to make it homogeneous (**Solution A**). Then, 50.0 mL of Solution A was transferred to a 250.0 mL conical flask (**Solution B**). To this, 1.5 test tube (Approx. 10-12 mL)  $\text{NH}_4\text{OH-NH}_4\text{Cl}$  buffer (pH 10) was added. Then, 4-5 drops of Eriochrome Black-T indicator was added. Solution in the conical flask was turned wine red and it was shaken well. Aq. Solution of  $\text{Na}_2\text{H}_2\text{EDTA}$  was filled in 25.0 mL burette. Then, titration was performed by drop wise addition of burette solution to the conical flask. A sharp colour change from wine red to blue was observed at the end point. This experiment was repeated three times. Obtained observations are listed below.

**Table 7: Readings of complexometric titration between Aq. Solutions of  $\text{Ca}^{+2}$  and  $\text{Na}_2\text{H}_2\text{EDTA}$  by using Eriochrome Black-T as indicator**

| <b>Experiment No.</b> | <b>Initial Reading (in mL)</b> | <b>Final Reading (in mL)</b> | <b>Difference (in mL)</b> | <b>Concordant Reading (in mL)</b> |
|-----------------------|--------------------------------|------------------------------|---------------------------|-----------------------------------|
| <b>1</b>              | <b>0.0</b>                     | <b>23.0</b>                  | <b>23.0</b>               | <b>23.0</b>                       |
| <b>2</b>              | <b>0.0</b>                     | <b>23.0</b>                  | <b>23.0</b>               |                                   |
| <b>3</b>              | <b>0.0</b>                     | <b>22.9</b>                  | <b>22.9</b>               |                                   |

**Theoretical Calculations:**

**Solution B contains 22.5 mg of  $\text{CaCO}_3$  (Theoretical Amount)**

**Solution A contains  $(22.5 \times 5) = 112.5$  mg of  $\text{CaCO}_3$  (Theoretical Amount)**

**Experimental Calculations:**

**1000.0 mL 1M  $\text{Na}_2\text{H}_2\text{EDTA} \equiv 100.0$  g  $\text{CaCO}_3 \equiv 40.0$  g  $\text{Ca}^{+2}$**

**1000.0 mL 0.01M  $\text{Na}_2\text{H}_2\text{EDTA} \equiv 1.0$  g  $\text{CaCO}_3 \equiv 0.4$  g  $\text{Ca}^{+2}$**

**1.0 mL 0.01M  $\text{Na}_2\text{H}_2\text{EDTA} \equiv 1.0$  mg  $\text{CaCO}_3 \equiv 0.4$  mg  $\text{Ca}^{+2}$**

**23.0 mL 0.01M  $\text{Na}_2\text{H}_2\text{EDTA} \equiv 23.0$  mg  $\text{CaCO}_3$**

**Solution B contains 23.0 mg of  $\text{CaCO}_3$  (Experimental Amount)**

**Solution A contains  $(23.0 \times 5) = 115.0$  mg of  $\text{CaCO}_3$  (Experimental Amount)**

**10) Gravimetric Estimation of Calcium Carbonate (Stock solution of Calcium**

**Carbonate was prepared by digesting 112.5 mg of Calcium Carbonate Powder with 3.0 mL Con. HCl)**

112.5 mg of calcium carbonate powder was taken in 100.0 mL beaker. To this, 3.0 mL Con. HCl was added with stirring followed by addition of 10.0 mL water. Beaker was covered with watch glass and then heated till the solution became clear and carbon dioxide expelled completely. Sides of beaker and watch glass were rinsed with distilled water and diluted up to 50.0 mL. Then, solution was heated to boiling and 2 drops of methyl red indicator was



added. To this, 10.0 mL 5% ammonium oxalate solution was added. To the resulted hot solution, (1:1) ammonia solution was added drop wise and with constant stirring until the mixture became neutral (color of solution changes to yellow from red). Formed precipitates were allowed to settle without further heating for one hour. Precipitates were filtered through previously weighed Whatman filter paper 40 and washed with 0.1% ammonium oxalate solution till it became free from chloride. Precipitates were dried on metallic cone on sand bath. Weight the amount of (Precipitate + Whatmann filter paper) and subtract it from the weight of empty Whatmann filter paper. This experiment was repeated three times and the results are reported below.

| Experiment No. | Weight of Filter Paper (in g) | Weight of (Filter Paper + Precipitates) (in g) | Weight of Precipitates (in g) | Concordant Reading (in mg) |
|----------------|-------------------------------|------------------------------------------------|-------------------------------|----------------------------|
| 01             | 1.1282 g                      | 1.2933                                         | 0.1651                        | 164.5                      |
| 02             | 1.0891 g                      | 1.2536                                         | 0.1645                        |                            |
| 03             | 1.0664 g                      | 1.2309                                         | 0.1645                        |                            |

### Calculations:

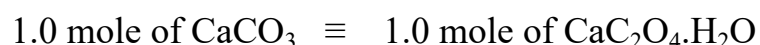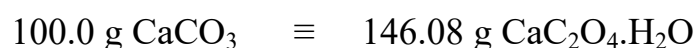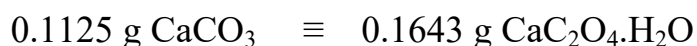

**Therefore, for obtained 164.5 mg CaC<sub>2</sub>O<sub>4</sub>·H<sub>2</sub>O, the equivalent amount of**

**CaCO<sub>3</sub> is 112.6 mg**

**11) pH-Metric Estimation of Calcium in White Marble Stone as Calcium Carbonate (CaCO<sub>3</sub>) by using Aq. Solution of Ca<sup>+2</sup> (pH 7) as titrand and Aq. Solution of Na<sub>3</sub>HEDTA (pH 11) as titrant (Stock solution of White Marble Stone was prepared by dissolving 46.2 mg of Dry White Marble Stone Powder)**

0.0462 g white marble stone powder was dissolved in 0.1 mL 11.3N HCl. It was transferred to a 250.0 mL standard volumetric flask and diluted up to the mark with water. Solution was shaken well to make it homogeneous (**Solution A**). Then, 50.0 mL of Solution A was transferred to a 100.0 mL beaker. Then, pH electrode was inserted to this solution and pH value was found to be 2.4. pH of this solution was adjusted to 7 by adding 2.0 mL 0.33 M NaOH solution (**Solution B**). Aqueous solution of 0.01M Na<sub>3</sub>HEDTA (pH 11) was prepared by mixing 250.0 mL 0.01M Na<sub>2</sub>H<sub>2</sub>EDTA and 15.0 mL 0.33M NaOH solutions. This solution was filled in 25.0 mL burette as titrant. Then, 0.5 mL 0.01M Na<sub>3</sub>HEDTA was added to Solution B having pH 7. Solution was shaken well with the help of glass rod and then pH reading was measured. Same process was repeated by adding 0.5 mL 0.01M Na<sub>3</sub>HEDTA from burette up to 12.0 mL and pH reading was measured after each 0.5 mL addition of burette solution.

**Table 8: Readings of pH-Metric Titration between Aq. Solutions of Ca<sup>+2</sup> (present in White Marble Stone) and Na<sub>3</sub>HEDTA**

| <b>Sr. No.</b> | <b>Volume of 0.01M Na<sub>3</sub>HEDTA (in mL)</b> | <b>pH</b> |
|----------------|----------------------------------------------------|-----------|
| 1              | 0.0                                                | 7.02      |
| 2              | 0.5                                                | 6.98      |
| 3              | 1.0                                                | 6.96      |
| 4              | 1.5                                                | 6.90      |
| 5              | 2.0                                                | 6.84      |
| 6              | 2.5                                                | 6.79      |

|           |            |             |
|-----------|------------|-------------|
| 7         | 3.0        | 6.75        |
| 8         | 3.5        | 6.69        |
| 9         | 4.0        | 6.62        |
| 10        | 4.5        | 6.59        |
| 11        | 5.0        | 6.56        |
| 12        | 5.5        | 6.51        |
| 13        | 6.0        | 6.46        |
| 14        | 6.5        | 6.42        |
| 15        | 7.0        | 6.38        |
| 16        | 7.5        | 6.33        |
| 17        | 8.0        | 6.28        |
| 18        | 8.5        | 6.24        |
| <b>19</b> | <b>9.0</b> | <b>6.18</b> |
| 20        | 9.5        | 7.13        |
| 21        | 10.0       | 7.74        |
| 22        | 10.5       | 8.45        |
| 23        | 11.0       | 9.27        |
| 24        | 11.5       | 9.68        |
| 25        | 12.0       | 10.24       |

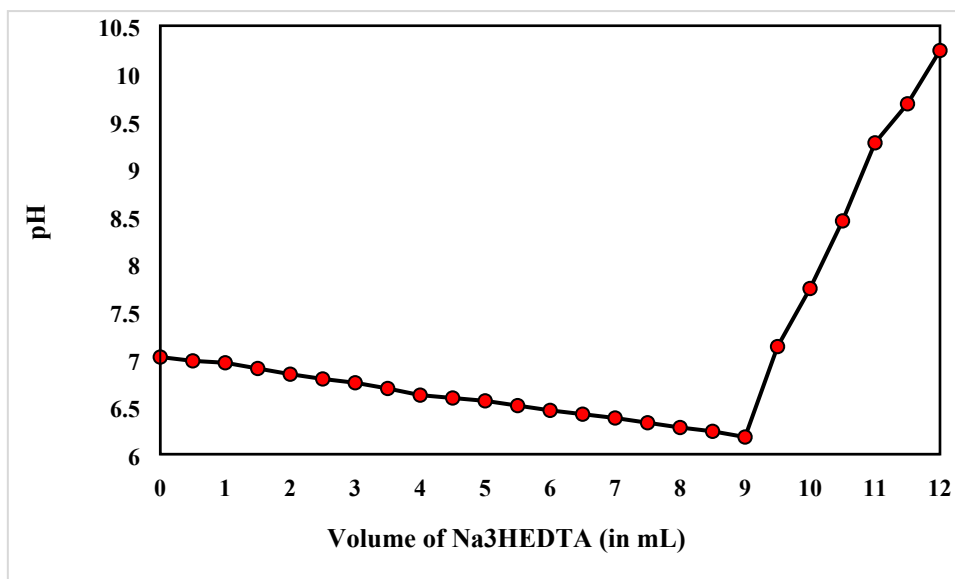

**Figure 5:** Effect of Aq.Na<sub>3</sub>HEDTA Addition on pH of Ca<sup>+2</sup> Solution

**Observations:** During this titration, formation of Ca-EDTA complex and release of one H<sup>+</sup> ion was taking place and hence decrease in pH from 7.02 to 6.18 was observed. At equivalence point, release of H<sup>+</sup> ion was stopped and sharp increase in pH was observed from 6.18 to 7.13 with further 0.5 mL addition of Na<sub>3</sub>HEDTA (pH 11). Upon subsequent addition of Na<sub>3</sub>HEDTA solution, pH value of solution significantly jumped to 7.74, 8.45 and 9.27. So sharp equivalence point for the titration was observed at 9.0 mL

**Experimental Calculations:**

|           |                             |   |                           |   |                         |
|-----------|-----------------------------|---|---------------------------|---|-------------------------|
| 1000.0 mL | 1M Na <sub>3</sub> HEDTA    | ≡ | 100.0 g CaCO <sub>3</sub> | ≡ | 40.0 g Ca <sup>+2</sup> |
| 1000.0 mL | 0.01M Na <sub>3</sub> HEDTA | ≡ | 1.0 g CaCO <sub>3</sub>   | ≡ | 0.4 g Ca <sup>+2</sup>  |
| 1.0 mL    | 0.01M Na <sub>3</sub> HEDTA | ≡ | 1.0 mg CaCO <sub>3</sub>  | ≡ | 0.4 mg Ca <sup>+2</sup> |
| 9.0 mL    | 0.01M Na <sub>3</sub> HEDTA | ≡ | 9.0 mg CaCO <sub>3</sub>  |   |                         |

Solution B contains 9.0 mg of CaCO<sub>3</sub> (Experimental Amount)

Solution A contains (9.0 x 5) = 45.0 mg of CaCO<sub>3</sub> (Experimental Amount)

**12) Estimation of Calcium as Calcium Carbonate (CaCO<sub>3</sub>) by using conventional complexometric titration method (Stock solution of Marble Stone was prepared by dissolving 46.2 mg of Dry White Marble Stone Powder)**

0.0462 g white marble stone powder was dissolved in 0.1 mL 11.3N HCl. It was transferred to a 250.0 mL standard volumetric flask and diluted up to the mark with water. Solution was shaken well to make it homogeneous (**Solution A**). Then, 50.0 mL of Solution A was transferred to a 250.0 mL conical flask (**Solution B**). To this, 1.5 test tube (Approx. 10-12 mL) NH<sub>4</sub>OH-NH<sub>4</sub>Cl buffer (pH 10) was added. Then, 4-5 drops of Eriochrome Black-T indicator was added. Solution in the conical flask was turned wine red and it was shaken well. Aq. Solution of Na<sub>2</sub>H<sub>2</sub>EDTA was filled in 25.0 mL burette. Then, titration was performed by drop wise addition of burette solution to the conical flask. A sharp colour change from wine red to blue was observed at the end point. This experiment was repeated three times. Obtained observations are listed below.

**Table 9: Readings of complexometric titration between Aq. Solutions of Ca<sup>+2</sup> and Na<sub>2</sub>H<sub>2</sub>EDTA by using Eriochrome Black-T as indicator**

| <b>Experiment No.</b> | <b>Initial Reading (in mL)</b> | <b>Final Reading (in mL)</b> | <b>Difference (in mL)</b> | <b>Concordant Reading (in mL)</b> |
|-----------------------|--------------------------------|------------------------------|---------------------------|-----------------------------------|
| <b>1</b>              | <b>0.0</b>                     | <b>9.4</b>                   | <b>9.4</b>                | <b>9.4</b>                        |
| <b>2</b>              | <b>0.0</b>                     | <b>9.4</b>                   | <b>9.4</b>                |                                   |
| <b>3</b>              | <b>0.0</b>                     | <b>9.4</b>                   | <b>9.4</b>                |                                   |

**Experimental Calculations:**

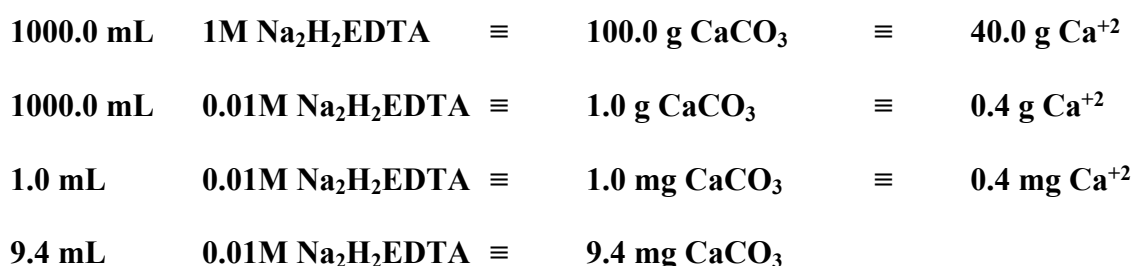

**Solution B contains 9.4 mg of CaCO<sub>3</sub> (Experimental Amount)**

**Solution A contains (9.4 x 5) = 47.0 mg of CaCO<sub>3</sub> (Experimental Amount)**

**13) Gravimetric Estimation of Calcium in White Marble Stone as Calcium Carbonate (CaCO<sub>3</sub>) (Stock solution of White Marble Stone was prepared by digesting 46.2 mg of Dry White Marble Stone Powder with 1.0 mL Con. HCl)**

46.2 mg of dry white marble stone powder was taken in 100.0 mL beaker. To this, 1.0 mL Con. HCl was added with stirring followed by addition of 10.0 mL water. Beaker was covered with watch glass and then heated till the solution became clear and carbon dioxide expelled completely. Sides of beaker and watch glass were rinsed with distilled water and diluted up to 50.0 mL. Then, solution was heated to boiling and 2 drops of methyl red indicator was added. To this, 5.0 mL 5% ammonium oxalate solution was added. To the resulted hot solution, (1:1) ammonia solution was added drop wise and with constant stirring until the mixture became neutral (color of solution changes to yellow from red). Formed precipitates were allowed to settle without further heating for one hour. Precipitates were filtered through previously weighed Whatman filter paper 40 and washed with 0.1% ammonium oxalate solution till it became free from chloride. Precipitates were dried on metallic cone on sand bath. Weight the amount of (Precipitate + Whatmann filter paper) and subtract it from the weight of empty Whatmann filter paper. This experiment was repeated three times and the results are reported below.

| Experiment No. | Weight of Filter Paper (in g) | Weight of (Filter Paper + Precipitates) (in g) | Weight of Precipitates (in g) | Concordant Reading (in mg) |
|----------------|-------------------------------|------------------------------------------------|-------------------------------|----------------------------|
| 01             | 1.0723 g                      | 1.1394                                         | 0.0671                        | 67.1                       |
| 02             | 1.1091 g                      | 1.1763                                         | 0.0672                        |                            |
| 03             | 1.0774 g                      | 1.1445                                         | 0.0671                        |                            |

### Calculations:

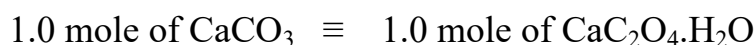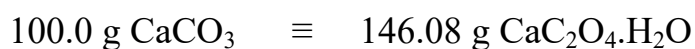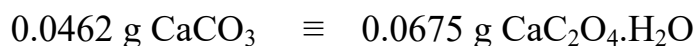

**Therefore, for obtained 67.1 mg CaC<sub>2</sub>O<sub>4</sub>·H<sub>2</sub>O, the equivalent amount of CaCO<sub>3</sub> is 45.9 mg**

- 14) pH-Metric Estimation of Calcium in Egg Shell as Calcium Carbonate (CaCO<sub>3</sub>) by using Aq. Solution of Ca<sup>+2</sup> (pH 7) as titrand and Aq. Solution of Na<sub>3</sub>HEDTA (pH 11) as titrant (Stock solution of Egg Shell was prepared by dissolving 49.7 mg of Dry Egg Shell Powder)

0.0497 g dry egg shell powder was dissolved in 0.1 mL 11.3N HCl. It was transferred to a 250.0 mL standard volumetric flask and diluted up to the mark with water. Solution was shaken well to make it homogeneous (**Solution A**). Then, 50.0 mL of Solution A was transferred to a 100.0 mL beaker. Then, pH electrode was inserted to this solution and pH value was found to be 2.3. pH of this solution was adjusted to 7 by adding 2.2 mL 0.33 M NaOH solution (**Solution B**). Aqueous solution of 0.01M Na<sub>3</sub>HEDTA (pH 11) was prepared by mixing 250.0 mL 0.01M Na<sub>2</sub>H<sub>2</sub>EDTA and 15.0 mL 0.33M NaOH solutions. This solution was filled in 25.0 mL burette as titrant. Then, 0.5 mL 0.01M Na<sub>3</sub>HEDTA was added to Solution B having pH 7. Solution was shaken well with the help of glass rod and then pH reading was measured. Same process was repeated by adding 0.5 mL 0.01M Na<sub>3</sub>HEDTA from burette up to 13.0 mL and pH reading was measured after each 0.5 mL addition of burette solution. Obtained readings and graph are described below.

**Table 10: Readings of pH-Metric Titration between Aq. Solutions of Ca<sup>+2</sup> (present in Egg Shell) and Na<sub>3</sub>HEDTA**

| <b>Sr. No.</b> | <b>Volume of 0.01M Na<sub>3</sub>HEDTA (in mL)</b> | <b>pH</b> |
|----------------|----------------------------------------------------|-----------|
| 1              | 0.0                                                | 7.05      |
| 2              | 0.5                                                | 7.0       |
| 3              | 1.0                                                | 6.96      |
| 4              | 1.5                                                | 6.88      |
| 5              | 2.0                                                | 6.82      |
| 6              | 2.5                                                | 6.76      |
| 7              | 3.0                                                | 6.70      |
| 8              | 3.5                                                | 6.63      |
| 9              | 4.0                                                | 6.57      |
| 10             | 4.5                                                | 6.54      |
| 11             | 5.0                                                | 6.50      |
| 12             | 5.5                                                | 6.45      |
| 13             | 6.0                                                | 6.41      |
| 14             | 6.5                                                | 6.39      |
| 15             | 7.0                                                | 6.36      |
| 16             | 7.5                                                | 6.32      |
| 17             | 8.0                                                | 6.28      |
| 18             | 8.5                                                | 6.25      |
| 19             | 9.0                                                | 6.22      |
| 20             | 9.5                                                | 6.16      |



|    |             |             |
|----|-------------|-------------|
| 21 | <b>10.0</b> | <b>6.10</b> |
| 22 | 10.5        | 6.47        |
| 23 | 11.0        | 6.95        |
| 24 | 11.5        | 7.53        |
| 25 | 12.0        | 8.40        |
| 26 | 12.5        | 9.20        |
| 27 | 13.0        | 9.73        |

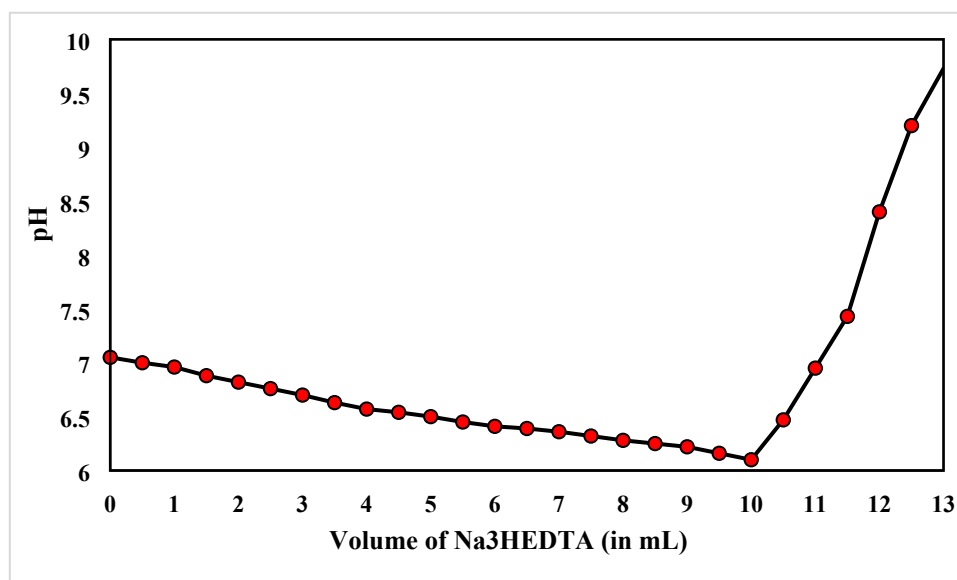

**Figure 6:** Effect of Aq.Na<sub>3</sub>HEDTA Addition on pH of Ca<sup>+2</sup> Solution

**Observations:** During this titration, formation of Ca-EDTA complex and release of one H<sup>+</sup> ion was taking place and hence decrease in pH from 7.05 to 6.10 was observed. At equivalence point, release of H<sup>+</sup> ion was stopped and sharp increase in pH was observed from 6.10 to 6.47 with further 0.5 mL addition of Na<sub>3</sub>HEDTA (pH 11). Upon subsequent addition of Na<sub>3</sub>HEDTA solution, pH value of solution significantly jumped to 6.95, 7.53 and 8.40. **So sharp equivalence point for the titration was observed at 10.0 mL**

**Experimental Calculations:**

|           |                             |   |                           |   |                         |
|-----------|-----------------------------|---|---------------------------|---|-------------------------|
| 1000.0 mL | 1M Na <sub>3</sub> HEDTA    | ≡ | 100.0 g CaCO <sub>3</sub> | ≡ | 40.0 g Ca <sup>+2</sup> |
| 1000.0 mL | 0.01M Na <sub>3</sub> HEDTA | ≡ | 1.0 g CaCO <sub>3</sub>   | ≡ | 0.4 g Ca <sup>+2</sup>  |
| 1.0 mL    | 0.01M Na <sub>3</sub> HEDTA | ≡ | 1.0 mg CaCO <sub>3</sub>  | ≡ | 0.4 mg Ca <sup>+2</sup> |
| 10.0 mL   | 0.01M Na <sub>3</sub> HEDTA | ≡ | 10.0 mg CaCO <sub>3</sub> |   |                         |

Solution B contains 10.0 mg of CaCO<sub>3</sub> (Experimental Amount)

Solution A contains (10.0 x 5) = 50.0 mg of CaCO<sub>3</sub> (Experimental Amount)

15) Estimation of Calcium as Calcium Carbonate (CaCO<sub>3</sub>) by using conventional complexometric titration method (Stock solution of Egg Shell was prepared by dissolving 49.7 mg of Dry Egg Shell Powder)

0.0497 g dry egg shell powder was dissolved in 0.1 mL 11.3N HCl. It was transferred to a 250.0 mL standard volumetric flask and diluted up to the mark with water. Solution was shaken well to make it homogeneous (**Solution A**). Then, 50.0 mL of Solution A was transferred to a 250.0 mL conical flask (**Solution B**). To this, 1.5 test tube (Approx. 10-12 mL) NH<sub>4</sub>OH-NH<sub>4</sub>Cl buffer (pH 10) was added. Then, 4-5 drops of Eriochrome Black-T indicator was added. Solution in the conical flask was turned wine red and it was shaken well. Aq. Solution of Na<sub>2</sub>H<sub>2</sub>EDTA was filled in 25.0 mL burette. Then, titration was performed by drop wise addition of burette solution to the conical flask. A sharp colour change from wine red to blue was observed at the end point. This experiment was repeated three times. Obtained observations are listed below.

**Table 11: Readings of complexometric titration between Aq. Solutions of Ca<sup>+2</sup> and Na<sub>2</sub>H<sub>2</sub>EDTA by using Eriochrome Black-T as indicator**

| Experiment No. | Initial Reading (in mL) | Final Reading (in mL) | Difference (in mL) | Concordant Reading (in mL) |
|----------------|-------------------------|-----------------------|--------------------|----------------------------|
| 1              | 0.0                     | 10.2                  | 10.2               | 10.2                       |
| 2              | 0.0                     | 10.2                  | 10.2               |                            |

|          |            |             |             |  |
|----------|------------|-------------|-------------|--|
| <b>3</b> | <b>0.0</b> | <b>10.2</b> | <b>10.2</b> |  |
|----------|------------|-------------|-------------|--|

**Experimental Calculations:**

$$1000.0 \text{ mL } 1\text{M Na}_2\text{H}_2\text{EDTA} \equiv 100.0 \text{ g CaCO}_3 \equiv 40.0 \text{ g Ca}^{+2}$$

$$1000.0 \text{ mL } 0.01\text{M Na}_2\text{H}_2\text{EDTA} \equiv 1.0 \text{ g CaCO}_3 \equiv 0.4 \text{ g Ca}^{+2}$$

$$1.0 \text{ mL } 0.01\text{M Na}_2\text{H}_2\text{EDTA} \equiv 1.0 \text{ mg CaCO}_3 \equiv 0.4 \text{ mg Ca}^{+2}$$

$$10.2 \text{ mL } 0.01\text{M Na}_2\text{H}_2\text{EDTA} \equiv 10.2 \text{ mg CaCO}_3$$

**Solution B contains 10.2 mg of CaCO<sub>3</sub> (Experimental Amount)**

**Solution A contains (10.2 x 5) = 51.0 mg of CaCO<sub>3</sub> (Experimental Amount)**

**16) Gravimetric Estimation of Calcium in Egg-Shell as Calcium Carbonate (CaCO<sub>3</sub>)**

**(Stock solution of Egg-Shell was prepared by digesting 49.7 mg of Dry Egg-Shell Powder with 1.0 mL Con. HCl)**

49.7 mg of dry Egg-Shell powder was taken in 100.0 mL beaker. To this, 1.0 mL Con. HCl was added with stirring followed by addition of 10.0 mL water. Beaker was covered with watch glass and then heated till the solution became clear and carbon dioxide expelled completely. Sides of beaker and watch glass were rinsed with distilled water and diluted up to 50.0 mL. Then, solution was heated to boiling and 2 drops of methyl red indicator was added. To this, 5.0 mL 5% ammonium oxalate solution was added. To the resulted hot solution, (1:1) ammonia solution was added drop wise and with constant stirring until the mixture became neutral (color of solution changes to yellow from red). Formed precipitates were allowed to settle without further heating for one hour. Precipitates were filtered through previously weighed Whatman filter paper 40 and washed with 0.1% ammonium oxalate solution till it became free from chloride. Precipitates were dried on metallic cone on sand bath. Weight the amount of (Precipitate + Whatmann filter paper) and subtract it from the weight of empty Whatmann filter paper. This experiment was repeated three times and the results are reported below.

| Experiment No. | Weight of Filter Paper (in g) | Weight of (Filter Paper + Precipitates) (in g) | Weight of Precipitates (in g) | Concordant Reading (in mg) |
|----------------|-------------------------------|------------------------------------------------|-------------------------------|----------------------------|
| 01             | 1.1385 g                      | 1.2106                                         | 0.0721                        | 72.1                       |
| 02             | 1.1428 g                      | 1.2149                                         | 0.0721                        |                            |
| 03             | 1.0882 g                      | 1.1606                                         | 0.0724                        |                            |

### Calculations:

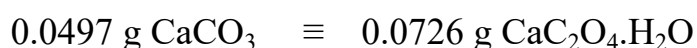

**Therefore, for obtained 72.1 mg CaC<sub>2</sub>O<sub>4</sub>·H<sub>2</sub>O, the equivalent amount of CaCO<sub>3</sub> is 49.3 mg**

### 17) pH-Metric Estimation of Calcium in Sea Shell as Calcium Carbonate (CaCO<sub>3</sub>) by using

**Aq. Solution of Ca<sup>2+</sup> (pH 7) as titrand and Aq. Solution of Na<sub>3</sub>HEDTA (pH 11) as titrant (Stock solution of Sea Shell was prepared by dissolving 41.7 mg of Dry Sea Shell Powder)**

0.0417 g dry sea shell powder was dissolved in 0.1 mL 11.3N HCl. It was transferred to a 250.0 mL standard volumetric flask and diluted up to the mark with water. Solution was shaken well to make it homogeneous (**Solution A**). Then, 50.0 mL of Solution A was transferred to a 100.0 mL beaker. Then, pH electrode was inserted to this solution and pH value was found to be 2.2. pH of this solution was adjusted to 7 by adding 2.0 mL 0.33 M NaOH solution (**Solution B**). Aqueous solution of 0.01M Na<sub>3</sub>HEDTA (pH 11) was prepared by mixing 250.0 mL 0.01M Na<sub>2</sub>H<sub>2</sub>EDTA and 15.0 mL 0.33M NaOH solutions. This solution was filled in 25.0 mL burette as titrant. Then, 0.5 mL 0.01M Na<sub>3</sub>HEDTA was added to Solution B having pH 7. Solution was shaken well with the help of glass rod and then pH reading was measured. Same process was repeated by adding 0.5 mL 0.01M Na<sub>3</sub>HEDTA from burette up to 12.0 mL and pH reading

was measured after each 0.5 mL addition of burette solution. Obtained readings and graph are described below.

**Table 12: Readings of pH-Metric Titration between Aq. Solutions of Ca<sup>+2</sup> (present in Sea Shell Powder) and Na<sub>3</sub>HEDTA**

| <b>Sr. No.</b> | <b>Volume of 0.01M Na<sub>3</sub>HEDTA (in mL)</b> | <b>pH</b>   |
|----------------|----------------------------------------------------|-------------|
| 1              | 0.0                                                | 7.05        |
| 2              | 0.5                                                | 6.99        |
| 3              | 1.0                                                | 6.94        |
| 4              | 1.5                                                | 6.88        |
| 5              | 2.0                                                | 6.82        |
| 6              | 2.5                                                | 6.77        |
| 7              | 3.0                                                | 6.73        |
| 8              | 3.5                                                | 6.69        |
| 9              | 4.0                                                | 6.65        |
| 10             | 4.5                                                | 6.61        |
| 11             | 5.0                                                | 6.58        |
| 12             | 5.5                                                | 6.52        |
| 13             | 6.0                                                | 6.45        |
| 14             | 6.5                                                | 6.39        |
| 15             | 7.0                                                | 6.34        |
| 16             | 7.5                                                | 6.29        |
| 17             | 8.0                                                | 6.24        |
| <b>18</b>      | <b>8.5</b>                                         | <b>6.16</b> |

|    |      |      |
|----|------|------|
| 19 | 9.0  | 6.55 |
| 20 | 9.5  | 7.13 |
| 21 | 10.0 | 7.66 |
| 22 | 10.5 | 8.49 |
| 23 | 11.0 | 9.13 |
| 24 | 11.5 | 9.47 |
| 25 | 12.0 | 9.85 |

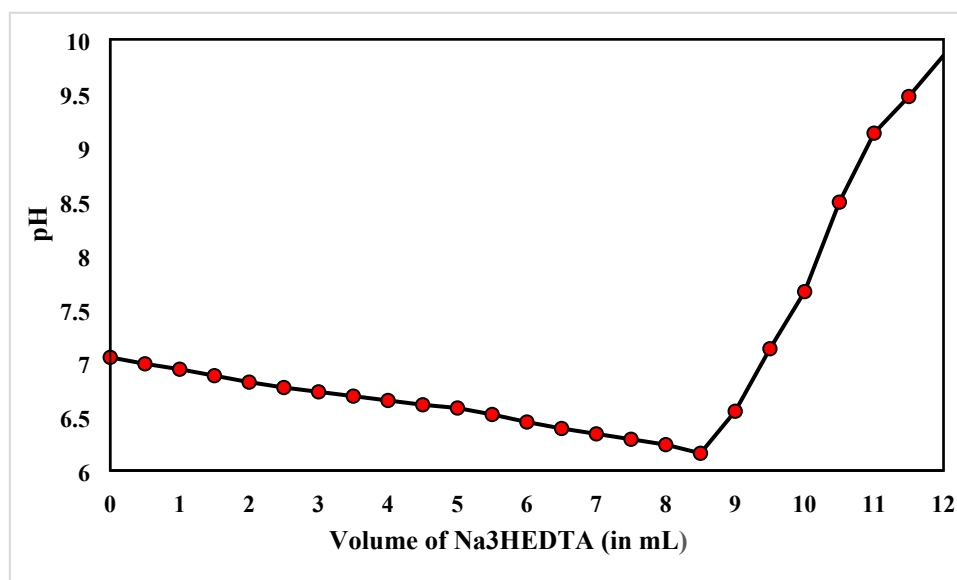

**Figure 7:** Effect of Aq.Na<sub>3</sub>HEDTA Addition on pH of Ca<sup>+2</sup> Solution

**Observations:** During this titration, formation of Ca-EDTA complex and release of one H<sup>+</sup> ion was taking place and hence decrease in pH from 7.05 to 6.16 was observed. At equivalence point, release of H<sup>+</sup> ion was stopped and sharp increase in pH was observed from 6.16 to 6.55 with further 0.5 mL addition of Na<sub>3</sub>HEDTA (pH 11). Upon subsequent addition of Na<sub>3</sub>HEDTA solution, pH value of solution significantly jumped to 7.13, 7.66 and 8.49. **So sharp equivalence point for the titration was observed at 8.5 mL**

**Experimental Calculations:**

**1000.0 mL 1M Na<sub>3</sub>HEDTA ≡ 100.0 g CaCO<sub>3</sub> ≡ 40.0 g Ca<sup>+2</sup>**

|                  |                                  |          |                                |          |                               |
|------------------|----------------------------------|----------|--------------------------------|----------|-------------------------------|
| <b>1000.0 mL</b> | <b>0.01M Na<sub>3</sub>HEDTA</b> | <b>≡</b> | <b>1.0 g CaCO<sub>3</sub></b>  | <b>≡</b> | <b>0.4 g Ca<sup>+2</sup></b>  |
| <b>1.0 mL</b>    | <b>0.01M Na<sub>3</sub>HEDTA</b> | <b>≡</b> | <b>1.0 mg CaCO<sub>3</sub></b> | <b>≡</b> | <b>0.4 mg Ca<sup>+2</sup></b> |
| <b>8.5 mL</b>    | <b>0.01M Na<sub>3</sub>HEDTA</b> | <b>≡</b> | <b>8.5 mg CaCO<sub>3</sub></b> |          |                               |

**Solution B contains 8.5 mg of CaCO<sub>3</sub> (Experimental Amount)**

**Solution A contains (8.5 x 5) = 42.5 mg of CaCO<sub>3</sub> (Experimental Amount)**

**18) Estimation of Calcium as Calcium Carbonate (CaCO<sub>3</sub>) by using conventional complexometric titration method (Stock solution of Sea Shell was prepared by dissolving 41.7 mg of Dry Sea Shell Powder)**

0.0417 g dry sea shell powder was dissolved in 0.1 mL 11.3N HCl. It was transferred to a 250.0 mL standard volumetric flask and diluted up to the mark with water. Solution was shaken well to make it homogeneous (**Solution A**). Then, 50.0 mL of Solution A was transferred to a 250.0 mL conical flask (**Solution B**). To this, 1.5 test tube (Approx. 10-12 mL) NH<sub>4</sub>OH-NH<sub>4</sub>Cl buffer (pH 10) was added. Then, 4-5 drops of Eriochrome Black-T indicator was added. Solution in the conical flask was turned wine red and it was shaken well. Aq. Solution of Na<sub>2</sub>H<sub>2</sub>EDTA was filled in 25.0 mL burette. Then, titration was performed by drop wise addition of burette solution to the conical flask. A sharp colour change from wine red to blue was observed at the end point. This experiment was repeated three times. Obtained observations are listed below.

**Table 13: Readings of complexometric titration between Aq. Solutions of Ca<sup>+2</sup> and Na<sub>2</sub>H<sub>2</sub>EDTA by using Eriochrome Black-T as indicator**

| <b>Experiment No.</b> | <b>Initial Reading (in mL)</b> | <b>Final Reading (in mL)</b> | <b>Difference (in mL)</b> | <b>Concordant Reading (in mL)</b> |
|-----------------------|--------------------------------|------------------------------|---------------------------|-----------------------------------|
| <b>1</b>              | <b>0.0</b>                     | <b>8.7</b>                   | <b>8.7</b>                | <b>8.7</b>                        |
| <b>2</b>              | <b>0.0</b>                     | <b>8.7</b>                   | <b>8.7</b>                |                                   |
| <b>3</b>              | <b>0.0</b>                     | <b>8.7</b>                   | <b>8.7</b>                |                                   |

**Experimental Calculations:**

|           |                                           |   |                           |   |                         |
|-----------|-------------------------------------------|---|---------------------------|---|-------------------------|
| 1000.0 mL | 1M Na <sub>2</sub> H <sub>2</sub> EDTA    | ≡ | 100.0 g CaCO <sub>3</sub> | ≡ | 40.0 g Ca <sup>+2</sup> |
| 1000.0 mL | 0.01M Na <sub>2</sub> H <sub>2</sub> EDTA | ≡ | 1.0 g CaCO <sub>3</sub>   | ≡ | 0.4 g Ca <sup>+2</sup>  |
| 1.0 mL    | 0.01M Na <sub>2</sub> H <sub>2</sub> EDTA | ≡ | 1.0 mg CaCO <sub>3</sub>  | ≡ | 0.4 mg Ca <sup>+2</sup> |
| 8.7 mL    | 0.01M Na <sub>2</sub> H <sub>2</sub> EDTA | ≡ | 8.7 mg CaCO <sub>3</sub>  |   |                         |

**Solution B contains 8.7 mg of CaCO<sub>3</sub> (Experimental Amount)**

**Solution A contains (8.7 x 5) = 43.5 mg of CaCO<sub>3</sub> (Experimental Amount)**

**19) Gravimetric Estimation of Calcium in Sea-Shell as Calcium Carbonate (CaCO<sub>3</sub>)**

**(Stock solution of Sea-Shell was prepared by digesting 41.7 mg of Dry Sea-Shell Powder with 1.0 mL Con. HCl)**

41.7 mg of dry Sea-Shell powder was taken in 100.0 mL beaker. To this, 1.0 mL Con. HCl was added with stirring followed by addition of 10.0 mL water. Beaker was covered with watch glass and then heated till the solution became clear and carbon dioxide expelled completely. Sides of beaker and watch glass were rinsed with distilled water and diluted up to 50.0 mL. Then, solution was heated to boiling and 2 drops of methyl red indicator was added. To this, 5.0 mL 5% ammonium oxalate solution was added. To the resulted hot solution, (1:1) ammonia solution was added drop wise and with constant stirring until the mixture became neutral (color of solution changes to yellow from red). Formed precipitates were allowed to settle without further heating for one hour. Precipitates were filtered through previously weighed Whatman filter paper 40 and washed with 0.1% ammonium oxalate solution till it became free from chloride. Precipitates were dried on metallic cone on sand bath. Weight the amount of (Precipitate + Whatmann filter paper) and subtract it from the weight of empty Whatmann filter paper. This experiment was repeated three times and the results are reported below.

| Experiment No. | Weight of Filter Paper (in g) | Weight of (Filter Paper + Precipitates) | Weight of Precipitates | Concordant Reading |
|----------------|-------------------------------|-----------------------------------------|------------------------|--------------------|
|----------------|-------------------------------|-----------------------------------------|------------------------|--------------------|



|    |        | (in g) | (in g) | (in mg) |
|----|--------|--------|--------|---------|
| 01 | 1.0662 | 1.1279 | 0.0617 | 61.7    |
| 02 | 1.0743 | 1.1363 | 0.0620 |         |
| 03 | 1.0545 | 1.1162 | 0.0617 |         |

### Calculations:

1.0 mole of  $\text{CaCO}_3 \equiv 1.0$  mole of  $\text{CaC}_2\text{O}_4 \cdot \text{H}_2\text{O}$

100.0 g  $\text{CaCO}_3 \equiv 146.08$  g  $\text{CaC}_2\text{O}_4 \cdot \text{H}_2\text{O}$

0.0417 g  $\text{CaCO}_3 \equiv 0.0609$  g  $\text{CaC}_2\text{O}_4 \cdot \text{H}_2\text{O}$

**Therefore, for obtained 61.7 mg  $\text{CaC}_2\text{O}_4 \cdot \text{H}_2\text{O}$ , the equivalent amount of  $\text{CaCO}_3$  is 42.2 mg**

### 20) pH-Metric Estimation of Calcium in Tablet as Calcium Carbonate ( $\text{CaCO}_3$ ) by using Aq. Solution of $\text{Ca}^{+2}$ (pH 7) as titrand and Aq. Solution of $\text{Na}_3\text{HEDTA}$ (pH 11) as titrant (Stock solution of Calcium Tablet was prepared by dissolving 50.0 mg of Dry Calcium Tablet Powder)

0.050 g dry calcium tablet powder was dissolved in 0.2 mL 11.3N HCl. It was transferred to a 250.0 mL standard volumetric flask and diluted up to the mark with water. Solution was shaken well to make it homogeneous (**Solution A**). Then, 50.0 mL of Solution A was transferred to a 100.0 mL beaker. Then, pH electrode was inserted to this solution and pH value was found to be 2.2. pH of this solution was adjusted to 7 by adding 2.5 mL 0.33 M NaOH solution (**Solution B**). Aqueous solution of 0.01M  $\text{Na}_3\text{HEDTA}$  (pH 11) was prepared by mixing 250.0 mL 0.01M  $\text{Na}_2\text{H}_2\text{EDTA}$  and 15.0 mL 0.33M NaOH solutions. This solution was filled in 25.0 mL burette as titrant. Then, 0.5 mL 0.01M  $\text{Na}_3\text{HEDTA}$  was added to Solution B having pH 7. Solution was shaken well with the help of glass rod and then pH reading was measured. Same process was repeated by adding 0.5 mL 0.01M  $\text{Na}_3\text{HEDTA}$  from burette up to 12.0 mL and pH reading

was measured after each 0.5 mL addition of burette solution. Obtained readings and graph are described below.

**Table 14: Readings of pH-Metric Titration between Aq. Solutions of Ca<sup>+2</sup> (present in Calcium Tablet) and Na<sub>3</sub>HEDTA**

| <b>Sr. No.</b> | <b>Volume of 0.01M Na<sub>3</sub>HEDTA (in mL)</b> | <b>pH</b> |
|----------------|----------------------------------------------------|-----------|
| 1              | 0.0                                                | 7.06      |
| 2              | 0.5                                                | 7.0       |
| 3              | 1.0                                                | 6.96      |
| 4              | 1.5                                                | 6.92      |
| 5              | 2.0                                                | 6.89      |
| 6              | 2.5                                                | 6.83      |
| 7              | 3.0                                                | 6.78      |
| 8              | 3.5                                                | 6.72      |
| 9              | 4.0                                                | 6.66      |
| 10             | 4.5                                                | 6.60      |
| 11             | 5.0                                                | 6.55      |
| 12             | 5.5                                                | 6.48      |
| 13             | 6.0                                                | 6.42      |
| 14             | 6.5                                                | 6.35      |
| 15             | 7.0                                                | 6.29      |
| 16             | 7.5                                                | 6.24      |
| 17             | 8.0                                                | 6.19      |
| 18             | 8.5                                                | 6.13      |

|    |             |             |
|----|-------------|-------------|
| 19 | 9.0         | 6.08        |
| 20 | 9.5         | 6.03        |
| 21 | <b>10.0</b> | <b>5.98</b> |
| 22 | 10.5        | 6.31        |
| 23 | 11.0        | 6.72        |
| 24 | 11.5        | 7.45        |
| 25 | 12.0        | 7.84        |
| 26 | 12.5        | 8.24        |
| 27 | 13.0        | 9.31        |

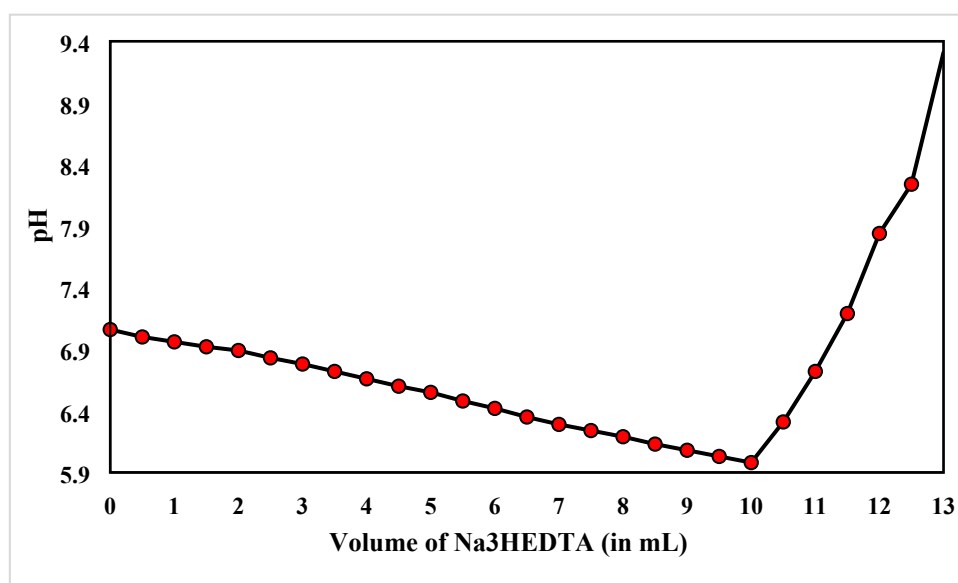

**Figure 8:** Effect of Aq.Na<sub>3</sub>HEDTA Addition on pH of Ca<sup>+2</sup> Solution

**Observations:** During this titration, formation of Ca-EDTA complex and release of one H<sup>+</sup> ion was taking place and hence decrease in pH from 7.06 to 5.98 was observed. At equivalence point, release of H<sup>+</sup> ion was stopped and sharp increase in pH was observed from 5.98 to 6.31 with further 0.5 mL addition of Na<sub>3</sub>HEDTA (pH 11). Upon subsequent addition of Na<sub>3</sub>HEDTA solution, pH value of solution significantly jumped to 6.72, 7.45 and 7.84. **So sharp equivalence point for the titration was observed at 10.0 mL**

**Experimental Calculations:**

|           |                             |   |                           |   |                         |
|-----------|-----------------------------|---|---------------------------|---|-------------------------|
| 1000.0 mL | 1M Na <sub>3</sub> HEDTA    | ≡ | 100.0 g CaCO <sub>3</sub> | ≡ | 40.0 g Ca <sup>+2</sup> |
| 1000.0 mL | 0.01M Na <sub>3</sub> HEDTA | ≡ | 1.0 g CaCO <sub>3</sub>   | ≡ | 0.4 g Ca <sup>+2</sup>  |
| 1.0 mL    | 0.01M Na <sub>3</sub> HEDTA | ≡ | 1.0 mg CaCO <sub>3</sub>  | ≡ | 0.4 mg Ca <sup>+2</sup> |
| 10.0 mL   | 0.01M Na <sub>3</sub> HEDTA | ≡ | 10.0 mg CaCO <sub>3</sub> |   |                         |

**Solution B contains 10.0 mg of CaCO<sub>3</sub> (Experimental Amount)**

**Solution A contains (10.0 x 5) = 50.0 mg of CaCO<sub>3</sub> (Experimental Amount)**

**21) Estimation of Calcium as Calcium Carbonate (CaCO<sub>3</sub>) by using conventional complexometric titration method (Stock solution of Calcium Tablet was prepared by dissolving 50.0 mg of Dry Calcium Tablet Powder)**

0.050 g dry calcium tablet powder was dissolved in 0.2 mL 11.3N HCl. It was transferred to a 250.0 mL standard volumetric flask and diluted up to the mark with water. Solution was shaken well to make it homogeneous (**Solution A**). Then, 50.0 mL of Solution A was transferred to a 250.0 mL conical flask (**Solution B**). To this, 1.5 test tube (Approx. 10-12 mL) NH<sub>4</sub>OH-NH<sub>4</sub>Cl buffer (pH 10) was added. Then, 4-5 drops of Eriochrome Black-T indicator was added. Solution in the conical flask was turned wine red and it was shaken well. Aq. Solution of Na<sub>2</sub>H<sub>2</sub>EDTA was filled in 25.0 mL burette. Then, titration was performed by drop wise addition of burette solution to the conical flask. A sharp colour change from wine red to blue was observed at the end point. This experiment was repeated three times. Obtained observations are listed below.

**Table 15: Readings of complexometric titration between Aq. Solutions of  $\text{Ca}^{+2}$  and  $\text{Na}_2\text{H}_2\text{EDTA}$  by using Eriochrome Black-T as indicator**

| <b>Experiment No.</b> | <b>Initial Reading (in mL)</b> | <b>Final Reading (in mL)</b> | <b>Difference (in mL)</b> | <b>Concordant Reading (in mL)</b> |
|-----------------------|--------------------------------|------------------------------|---------------------------|-----------------------------------|
| <b>1</b>              | <b>0.0</b>                     | <b>10.4</b>                  | <b>10.4</b>               | <b>10.4</b>                       |
| <b>2</b>              | <b>0.0</b>                     | <b>10.4</b>                  | <b>10.4</b>               |                                   |
| <b>3</b>              | <b>0.0</b>                     | <b>10.4</b>                  | <b>10.4</b>               |                                   |

**Experimental Calculations:**

$$1000.0 \text{ mL } 1\text{M Na}_2\text{H}_2\text{EDTA} \equiv 100.0 \text{ g CaCO}_3 \equiv 40.0 \text{ g Ca}^{+2}$$

$$1000.0 \text{ mL } 0.01\text{M Na}_2\text{H}_2\text{EDTA} \equiv 1.0 \text{ g CaCO}_3 \equiv 0.4 \text{ g Ca}^{+2}$$

$$1.0 \text{ mL } 0.01\text{M Na}_2\text{H}_2\text{EDTA} \equiv 1.0 \text{ mg CaCO}_3 \equiv 0.4 \text{ mg Ca}^{+2}$$

$$10.4 \text{ mL } 0.01\text{M Na}_2\text{H}_2\text{EDTA} \equiv 10.4 \text{ mg CaCO}_3$$

**Solution B contains 10.4 mg of  $\text{CaCO}_3$  (Experimental Amount)**

**Solution A contains  $(10.4 \times 5) = 52.0$  mg of  $\text{CaCO}_3$  (Experimental Amount)**

**22) Gravimetric Estimation of Calcium in Calcium Tablet as Calcium Carbonate ( $\text{CaCO}_3$ ) (Stock solution of Calcium Tablet was prepared by digesting 50.0 mg of Dry Calcium Tablet Powder with 1.0 mL Con. HCl)**

50.0 mg of dry Calcium Tablet powder was taken in 100.0 mL beaker. To this, 1.0 mL Con. HCl was added with stirring followed by addition of 10.0 mL water. Beaker was covered with watch glass and then heated till the solution became clear and carbon dioxide expelled completely. Sides of beaker and watch glass were rinsed with distilled water and diluted up to 50.0 mL. Then, solution was heated to boiling and 2 drops of methyl red indicator was added. To this, 5.0 mL 5% ammonium oxalate solution was added. To the resulted hot solution, (1:1) ammonia solution was added drop wise and with constant stirring until the mixture became neutral (color of solution changes to yellow from red). Formed precipitates

were allowed to settle without further heating for one hour. Precipitates were filtered through previously weighed Whatman filter paper 40 and washed with 0.1% ammonium oxalate solution till it became free from chloride. Precipitates were dried on metallic cone on sand bath. Weight the amount of (Precipitate + Whatmann filter paper) and subtract it from the weight of empty Whatmann filter paper. This experiment was repeated three times and the results are reported below.

| Experiment No. | Weight of Filter Paper (in g) | Weight of (Filter Paper + Precipitates) (in g) | Weight of Precipitates (in g) | Concordant Reading (in mg) |
|----------------|-------------------------------|------------------------------------------------|-------------------------------|----------------------------|
| 01             | 1.1201                        | 1.1932                                         | 0.0731                        | 0.0724                     |
| 02             | 1.0983                        | 1.1707                                         | 0.0724                        |                            |
| 03             | 1.0654                        | 1.1378                                         | 0.0724                        |                            |

### Calculations:

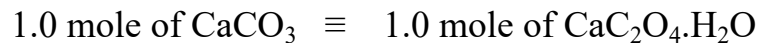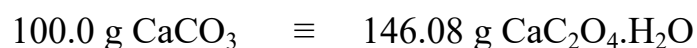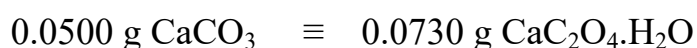

**Therefore, for obtained 72.4 mg CaC<sub>2</sub>O<sub>4</sub>·H<sub>2</sub>O, the equivalent amount of CaCO<sub>3</sub> is 49.5 mg**

**23) pH-Metric Estimation of Calcium as Calcium Carbonate (CaCO<sub>3</sub>) by using Aq. Solution of Ca<sup>+2</sup> (pH 7) as titrand and Aq. Solution of Na<sub>3</sub>HEDTA (pH 11) as titrant (Stock solution of Ca<sup>+2</sup> was prepared by dissolving 5.0 mg of CaCO<sub>3</sub> in 250.0 mL water)**

0.005g CaCO<sub>3</sub> was dissolved in minimum amount of conc. HCl. It was transferred to a 250.0 mL standard volumetric flask and diluted up to the mark with water. Solution was shaken well to make it homogeneous (**Solution A**). Then, 50.0 mL of Solution A was transferred to a 100.0

mL beaker. Then, pH electrode was inserted to this solution and pH value was measured and adjusted to 7.0 by adding 0.33 M NaOH solution (**Solution B**). Aqueous solution of 0.01M Na<sub>3</sub>HEDTA (pH 11) was prepared by mixing 250.0 mL 0.01M Na<sub>2</sub>H<sub>2</sub>EDTA and 15.0 mL 0.33M NaOH solutions. This solution was filled in 25.0 mL burette as titrant. Then, 0.5 mL 0.01M Na<sub>3</sub>HEDTA was added to Solution B having pH 7. Solution was shaken well with the help of glass rod and then pH reading was measured. Same process was repeated by adding 0.5 mL 0.01M Na<sub>3</sub>HEDTA from burette up to 2.0 mL and pH reading was measured after each 0.5 mL addition of burette solution. Obtained readings and graph are described below.

**Table 16: Readings of pH-Metric Titration between Aq. Solutions of Ca<sup>+2</sup> (present in Calcium Tablet) and Na<sub>3</sub>HEDTA**

| Sr. No. | Volume of 0.01M Na <sub>3</sub> HEDTA (in mL) | pH   |
|---------|-----------------------------------------------|------|
| 1       | 0.0                                           | 7.03 |
| 2       | 0.5                                           | 6.82 |
| 3       | 1.0                                           | 6.71 |
| 4       | 1.5                                           | 7.33 |
| 5       | 2.0                                           | 9.11 |
| 6       | 2.5                                           | 9.64 |

**Observations:** During this titration, formation of Ca-EDTA complex and release of one H<sup>+</sup> ion was taking place and hence decrease in pH from 7.03 to 6.71 was observed. At equivalence point, release of H<sup>+</sup> ion was stopped and sharp increase in pH was observed from 6.71 to 7.33 with further 0.5 mL addition of Na<sub>3</sub>HEDTA (pH 11). Upon subsequent addition of Na<sub>3</sub>HEDTA solution, pH value of solution significantly jumped to 9.11 and 9.64. **So sharp equivalence point for the titration was observed at 1.0 mL**

**Experimental Calculations:**

|                  |                                  |          |                                 |          |                               |
|------------------|----------------------------------|----------|---------------------------------|----------|-------------------------------|
| <b>1000.0 mL</b> | <b>1M Na<sub>3</sub>HEDTA</b>    | <b>≡</b> | <b>100.0 g CaCO<sub>3</sub></b> | <b>≡</b> | <b>40.0 g Ca<sup>+2</sup></b> |
| <b>1000.0 mL</b> | <b>0.01M Na<sub>3</sub>HEDTA</b> | <b>≡</b> | <b>1.0 g CaCO<sub>3</sub></b>   | <b>≡</b> | <b>0.4 g Ca<sup>+2</sup></b>  |
| <b>1.0 mL</b>    | <b>0.01M Na<sub>3</sub>HEDTA</b> | <b>≡</b> | <b>1.0 mg CaCO<sub>3</sub></b>  | <b>≡</b> | <b>0.4 mg Ca<sup>+2</sup></b> |

**Solution B contains 1.0 mg of CaCO<sub>3</sub> (Experimental Amount)**

**Solution A contains (1.0 x 5) = 5.0 mg of CaCO<sub>3</sub> (Experimental Amount)**

**24) pH-Metric Titration of Calcium as Calcium Carbonate (CaCO<sub>3</sub>) by using Aq. Solution of Ca<sup>+2</sup> (pH 7) as titrand and Aq. Solution of Na<sub>4</sub>EDTA (pH 12) as titrant (Stock solution of Ca<sup>+2</sup> was prepared by dissolving 37.7 mg of CaCO<sub>3</sub> in 250.0 mL water)**

0.0377 g CaCO<sub>3</sub> was dissolved in 0.1 mL 11.3N HCl. It was transferred to a 250.0 mL standard volumetric flask and diluted up to the mark with water. Solution was shaken well to make it homogeneous (**Solution A**). Then, 50.0 mL of Solution A was transferred to a 100.0 mL beaker. Then, pH electrode was inserted to this solution and pH value was found to be 2.4. pH of this solution was adjusted to 7 by adding 2.0 mL 0.33 M NaOH solution (**Solution B**). Aqueous solution of 0.01M Na<sub>4</sub>EDTA (pH 12) was prepared by mixing 0.01M Na<sub>2</sub>H<sub>2</sub>EDTA and 0.33M NaOH solutions. This solution was filled in 25.0 mL burette as titrant. Then, 0.5 mL 0.01M Na<sub>4</sub>EDTA was added to Solution B having pH 7. Solution was shaken well with the help of glass rod and then pH reading was measured. Same process was repeated by adding 0.5 mL 0.01M Na<sub>4</sub>EDTA from burette up to 12.0 mL and pH reading was measured after each 0.5 mL addition of burette solution. Obtained readings and graph are described below.



**Table 17: pH-Metric Titration Readings between Aq. Solutions of Ca<sup>+2</sup> and Na<sub>4</sub>EDTA**

| <b>Sr. No.</b> | <b>Volume of 0.01M<br/>Na<sub>3</sub>HEDTA (in mL)</b> | <b>pH</b> |
|----------------|--------------------------------------------------------|-----------|
| 1              | 0.0                                                    | 7.04      |
| 2              | 0.5                                                    | 7.69      |
| 3              | 1.0                                                    | 8.25      |
| 4              | 1.5                                                    | 8.63      |
| 5              | 2.0                                                    | 9.03      |
| 6              | 2.5                                                    | 9.18      |
| 7              | 3.0                                                    | 9.40      |
| 8              | 3.5                                                    | 9.52      |
| 9              | 4.0                                                    | 9.66      |
| 10             | 4.5                                                    | 9.78      |
| 11             | 5.0                                                    | 9.89      |
| 12             | 5.5                                                    | 9.98      |
| 13             | 6.0                                                    | 10.08     |
| 14             | 6.5                                                    | 10.19     |
| 15             | 7.0                                                    | 10.24     |
| 16             | 7.5                                                    | 10.30     |
| 17             | 8.0                                                    | 10.37     |
| 18             | 8.5                                                    | 10.43     |
| 19             | 9.0                                                    | 10.49     |
| 20             | 9.5                                                    | 10.53     |
| 21             | 10.0                                                   | 10.59     |

|    |      |       |
|----|------|-------|
| 22 | 10.5 | 10.63 |
| 23 | 11.0 | 10.67 |
| 24 | 11.5 | 10.72 |
| 25 | 12.0 | 10.76 |

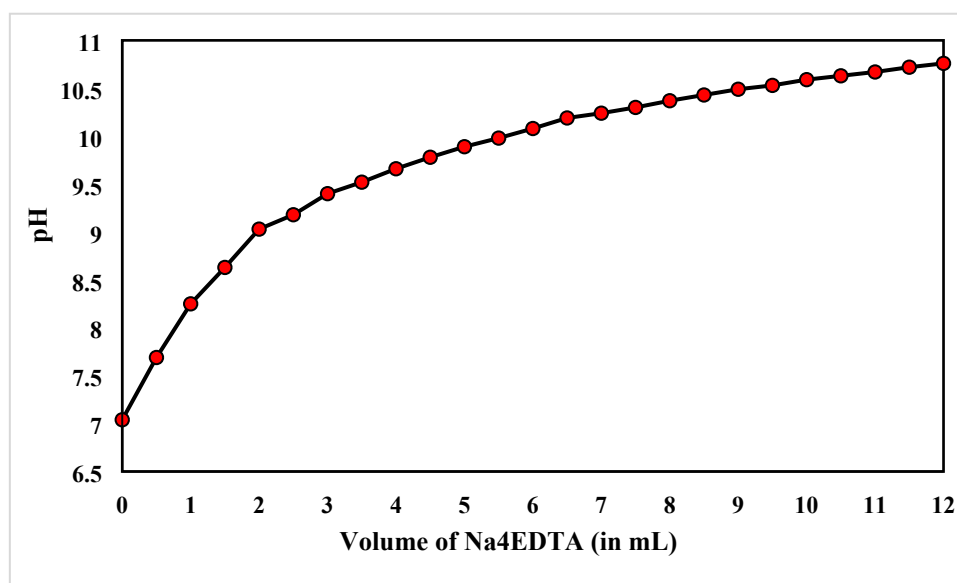

**Figure 9:** Effect of Aq.Na<sub>4</sub>EDTA Addition on pH of Ca<sup>2+</sup> Solution

During this titration, release of one H<sup>+</sup> ion was not taking place and hence decrease in pH was not observed. However, continuous increase in pH was observed. No sharp equivalence point was observed.

**25) Estimation of Calcium as Calcium Carbonate (CaCO<sub>3</sub>) by using Aq. Solution of Ca<sup>2+</sup> (pH 7) as titrand, Aq. Solution of Na<sub>3</sub>HEDTA (pH 11) as titrant and bromothymol blue as indicator (Stock solution of CaCO<sub>3</sub> was prepared by dissolving 37.5 mg of CaCO<sub>3</sub>)**

0.0375 g CaCO<sub>3</sub> was dissolved in 0.1 mL 11.3N HCl. It was transferred to a 250.0 mL standard volumetric flask and diluted up to the mark with water. Solution was shaken well to make it homogeneous (**Solution A**). Then, 50.0 mL of Solution A was transferred to a 250.0 mL beaker. Then, pH electrode was inserted to this solution and pH value was found to be 2.5. pH of this solution was adjusted to 7 by adding 2.0 mL 0.33 M NaOH solution (**Solution B**). 50.0 mL of solution B was transferred to 250.0 mL conical flask. To this, 3-4 drops of bromothymol

blue indicator was added. Colour of solution was colourless to pale green. Aqueous solution of 0.01M Na<sub>3</sub>HEDTA (pH 11) was prepared by mixing 250.0 mL 0.01M Na<sub>2</sub>H<sub>2</sub>EDTA and 15.0 mL 0.33M NaOH solutions. This solution was filled in 25.0 mL burette as titrant. Then, titration was performed by drop wise addition of burette solution to the conical flask. With progress of titration, pH of solution decreases and colour of solution changed from light green to yellow. After surpassing the equivalence point, further addition of Na<sub>3</sub>HEDTA solution caused sharp increase in the pH of solution i.e pH $\geq$ 7.5 and its colour changed from yellow to intense blue which was detected as end point of the titration. This experiment was repeated three times. Obtained observations are listed below.

**Table 18A (Solution Set-I): Readings of complexometric titration between Aq. Solutions of Ca<sup>+2</sup> and Na<sub>3</sub>HEDTA by using bromothymol blue as indicator**

| <b>Experiment No.</b> | <b>Initial Reading (in mL)</b> | <b>Final Reading (in mL)</b> | <b>Difference (in mL)</b> | <b>Concordant Reading (in mL)</b> |
|-----------------------|--------------------------------|------------------------------|---------------------------|-----------------------------------|
| <b>1</b>              | <b>0.0</b>                     | <b>8.3</b>                   | <b>8.3</b>                | <b>8.3</b>                        |
| <b>2</b>              | <b>0.0</b>                     | <b>8.3</b>                   | <b>8.3</b>                |                                   |
| <b>3</b>              | <b>0.0</b>                     | <b>8.3</b>                   | <b>8.3</b>                |                                   |

**Table 18B (Solution Set-II): Readings of complexometric titration between Aq. Solutions of Ca<sup>+2</sup> and Na<sub>3</sub>HEDTA by using bromothymol blue as indicator**

| <b>Experiment No.</b> | <b>Initial Reading (in mL)</b> | <b>Final Reading (in mL)</b> | <b>Difference (in mL)</b> | <b>Concordant Reading (in mL)</b> |
|-----------------------|--------------------------------|------------------------------|---------------------------|-----------------------------------|
| <b>1</b>              | <b>0.0</b>                     | <b>8.3</b>                   | <b>8.3</b>                | <b>8.3</b>                        |
| <b>2</b>              | <b>0.0</b>                     | <b>8.4</b>                   | <b>8.4</b>                |                                   |
| <b>3</b>              | <b>0.0</b>                     | <b>8.3</b>                   | <b>8.3</b>                |                                   |

**Table 18C (Solution Set-III): Readings of complexometric titration between Aq. Solutions of  $\text{Ca}^{+2}$  and  $\text{Na}_3\text{HEDTA}$  by using bromothymol blue as indicator**

| Experiment No. | Initial Reading (in mL) | Final Reading (in mL) | Difference (in mL) | Concordant Reading (in mL) |
|----------------|-------------------------|-----------------------|--------------------|----------------------------|
| 1              | 0.0                     | 8.5                   | 8.5                | 8.3                        |
| 2              | 0.0                     | 8.3                   | 8.3                |                            |
| 3              | 0.0                     | 8.3                   | 8.3                |                            |

**Relative Standard Deviation of Above Nine Readings: 0.85%**

**Theoretical Calculations:**

Solution B contains 7.5 mg of  $\text{CaCO}_3$  (Theoretical Amount)

Solution A contains  $(7.5 \times 5) = 37.5$  mg of  $\text{CaCO}_3$  (Theoretical Amount)

**Experimental Calculations:**

1000.0 mL 1M  $\text{Na}_2\text{H}_2\text{EDTA} \equiv 100.0$  g  $\text{CaCO}_3 \equiv 40.0$  g  $\text{Ca}^{+2}$

1000.0 mL 0.01M  $\text{Na}_2\text{H}_2\text{EDTA} \equiv 1.0$  g  $\text{CaCO}_3 \equiv 0.4$  g  $\text{Ca}^{+2}$

1.0 mL 0.01M  $\text{Na}_2\text{H}_2\text{EDTA} \equiv 1.0$  mg  $\text{CaCO}_3 \equiv 0.4$  mg  $\text{Ca}^{+2}$

8.3 mL 0.01M  $\text{Na}_2\text{H}_2\text{EDTA} \equiv 8.3$  mg  $\text{CaCO}_3$

Solution B contains 8.3 mg of  $\text{CaCO}_3$  (Experimental Amount)

Solution A contains  $(8.3 \times 5) = 41.5$  mg of  $\text{CaCO}_3$  (Experimental Amount)

- 26) Estimation of Calcium as Calcium Carbonate ( $\text{CaCO}_3$ ) by using Aq. Solution of  $\text{Ca}^{+2}$  (pH 7) as titrand, Aq. Solution of  $\text{Na}_3\text{HEDTA}$  (pH 11) as titrant and bromothymol blue as indicator (Stock solution of  $\text{CaCO}_3$  was prepared by dissolving 50.0 mg of Marble Stone Powder)

0.050 g marble stone powder was dissolved in 0.2 mL 11.3N HCl. It was transferred to a 250.0 mL standard volumetric flask and diluted up to the mark with water. Solution was shaken well

to make it homogeneous (**Solution A**). Then, 50.0 mL of Solution A was transferred to a 250.0 mL beaker. Then, pH electrode was inserted to this solution and pH value was found to be 2.4. pH of this solution was adjusted to 7 by adding 2.2 mL 0.33 M NaOH solution (**Solution B**). 50.0 mL of solution B was transferred to 250.0 mL conical flask. To this, 3-4 drops of bromothymol blue indicator was added. Colour of solution was colourless to pale green. Aqueous solution of 0.01M Na<sub>3</sub>HEDTA (pH 11) was prepared by mixing 250.0 mL 0.01M Na<sub>2</sub>H<sub>2</sub>EDTA and 15.0 mL 0.33M NaOH solutions. This solution was filled in 25.0 mL burette as titrant. Then, titration was performed by drop wise addition of burette solution to the conical flask. With progress of titration, pH of solution decreases and colour of solution changed from light green to yellow. After surpassing the equivalence point, further addition of Na<sub>3</sub>HEDTA solution caused sharp increase in the pH of solution i.e pH $\geq$ 7.5 and its colour changed from yellow to intense blue which was detected as end point of the titration. This experiment was repeated three times. Obtained observations are listed below.

**Table 19A (Solution Set-I): Readings of complexometric titration between Aq. Solutions of Ca<sup>+2</sup> and Na<sub>3</sub>HEDTA by using bromothymol blue as indicator**

| <b>Experiment No.</b> | <b>Initial Reading (in mL)</b> | <b>Final Reading (in mL)</b> | <b>Difference (in mL)</b> | <b>Concordant Reading (in mL)</b> |
|-----------------------|--------------------------------|------------------------------|---------------------------|-----------------------------------|
| <b>1</b>              | <b>0.0</b>                     | <b>10.7</b>                  | <b>10.7</b>               | <b>10.7</b>                       |
| <b>2</b>              | <b>0.0</b>                     | <b>10.7</b>                  | <b>10.7</b>               |                                   |
| <b>3</b>              | <b>0.0</b>                     | <b>10.7</b>                  | <b>10.7</b>               |                                   |

**Table 19B (Solution Set-II): Readings of complexometric titration between Aq. Solutions of  $\text{Ca}^{+2}$  and  $\text{Na}_3\text{HEDTA}$  by using bromothymol blue as indicator**

| Experiment No. | Initial Reading (in mL) | Final Reading (in mL) | Difference (in mL) | Concordant Reading (in mL) |
|----------------|-------------------------|-----------------------|--------------------|----------------------------|
| 1              | 0.0                     | 10.8                  | 10.8               | 10.7                       |
| 2              | 0.0                     | 10.7                  | 10.7               |                            |
| 3              | 0.0                     | 10.7                  | 10.7               |                            |

**Table 19C (Solution Set-III): Readings of complexometric titration between Aq. Solutions of  $\text{Ca}^{+2}$  and  $\text{Na}_3\text{HEDTA}$  by using bromothymol blue as indicator**

| Experiment No. | Initial Reading (in mL) | Final Reading (in mL) | Difference (in mL) | Concordant Reading (in mL) |
|----------------|-------------------------|-----------------------|--------------------|----------------------------|
| 1              | 0.0                     | 10.7                  | 10.7               | 10.7                       |
| 2              | 0.0                     | 10.8                  | 10.8               |                            |
| 3              | 0.0                     | 10.7                  | 10.7               |                            |

**Relative Standard Deviation of Above Nine Readings: 0.41%**

**Theoretical Calculations:**

Solution B contains 10.0 mg of  $\text{CaCO}_3$  (Theoretical Amount)

Solution A contains  $(10.0 \times 5) = 50.0$  mg of  $\text{CaCO}_3$  (Theoretical Amount)

**Experimental Calculations:**

1000.0 mL 1M  $\text{Na}_2\text{H}_2\text{EDTA} \equiv 100.0$  g  $\text{CaCO}_3 \equiv 40.0$  g  $\text{Ca}^{+2}$

1000.0 mL 0.01M  $\text{Na}_2\text{H}_2\text{EDTA} \equiv 1.0$  g  $\text{CaCO}_3 \equiv 0.4$  g  $\text{Ca}^{+2}$

1.0 mL 0.01M  $\text{Na}_2\text{H}_2\text{EDTA} \equiv 1.0$  mg  $\text{CaCO}_3 \equiv 0.4$  mg  $\text{Ca}^{+2}$

10.7 mL 0.01M  $\text{Na}_2\text{H}_2\text{EDTA} \equiv 10.7$  mg  $\text{CaCO}_3$

Solution B contains 10.7 mg of  $\text{CaCO}_3$  (Experimental Amount)

Solution A contains  $(10.7 \times 5) = 53.5$  mg of  $\text{CaCO}_3$  (Experimental Amount)

**27) Estimation of Calcium as Calcium Carbonate (CaCO<sub>3</sub>) by using conventional complexometric Titration Method (Stock solution of White Marble Stone was prepared by dissolving 50.0 mg of Dry White Marble Stone Powder)**

0.050 g marble stone powder was dissolved in 0.2 mL 11.3N HCl. It was transferred to a 250.0 mL standard volumetric flask and diluted up to the mark with water. Solution was shaken well to make it homogeneous (**Solution A**). Then, 50.0 mL of Solution A was transferred to a 250.0 mL conical flask (**Solution B**). To this, 1.5 test tube (Approx. 10-12 mL) NH<sub>4</sub>OH-NH<sub>4</sub>Cl buffer (pH 10) was added. Then, 4-5 drops of Eriochrome Black-T indicator was added. Solution in the conical flask was turned wine red and it was shaken well. Aq. Solution of Na<sub>2</sub>H<sub>2</sub>EDTA was filled in 25.0 mL burette. Then, titration was performed by drop wise addition of burette solution to the conical flask. A sharp colour change from wine red to blue was observed at the end point. This experiment was repeated three times. Obtained observations are listed below.

**Table 20: Readings of complexometric titration between Aq. Solutions of Ca<sup>+2</sup> and Na<sub>2</sub>H<sub>2</sub>EDTA by using Eriochrome Black-T as indicator**

| Experiment No. | Initial Reading (in mL) | Final Reading (in mL) | Difference (in mL) | Concordant Reading (in mL) |
|----------------|-------------------------|-----------------------|--------------------|----------------------------|
| 1              | 0.0                     | 10.2                  | 10.2               | 10.2                       |
| 2              | 0.0                     | 10.2                  | 10.2               |                            |
| 3              | 0.0                     | 10.2                  | 10.2               |                            |

**Experimental Calculations:**

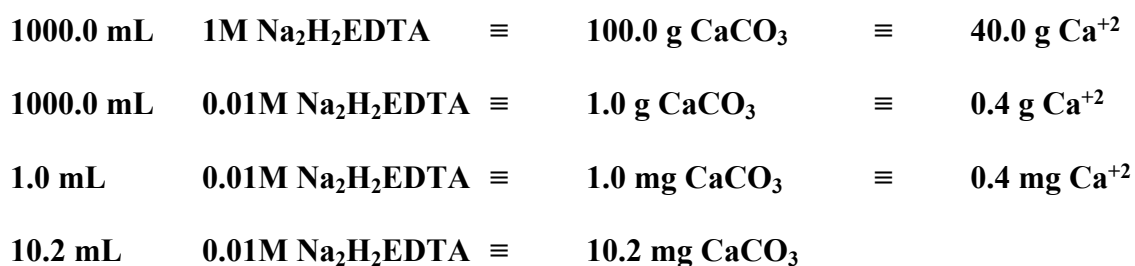

**Solution B contains 10.2 mg of CaCO<sub>3</sub> (Experimental Amount)**

**Solution A contains  $(10.2 \times 5) = 51.0$  mg of  $\text{CaCO}_3$  (Experimental Amount)**

## **28) Gravimetric Estimation of Calcium in White Marble Stone as Calcium Carbonate**

**( $\text{CaCO}_3$ ) (Stock solution of White Marble Stone was prepared by digesting 50.0 mg of Dry White Marble Stone Powder with 1.0 mL Con. HCl)**

50.0 mg of dry white marble stone powder was taken in 100.0 mL beaker. To this, 1.0 mL Con. HCl was added with stirring followed by addition of 10.0 mL water. Beaker was covered with watch glass and then heated till the solution became clear and carbon dioxide expelled completely. Sides of beaker and watch glass were rinsed with distilled water and diluted up to 50.0 mL. Then, solution was heated to boiling and 2 drops of methyl red indicator was added. To this, 5.0 mL 5% ammonium oxalate solution was added. To the resulted hot solution, (1:1) ammonia solution was added drop wise and with constant stirring until the mixture became neutral (color of solution changes to yellow from red). Formed precipitates were allowed to settle without further heating for one hour. Precipitates were filtered through previously weighed Whatman filter paper 40 and washed with 0.1% ammonium oxalate solution till it became free from chloride. Precipitates were dried on metallic cone on sand bath. Weight the amount of (Precipitate + Whatmann filter paper) and subtract it from the weight of empty Whatmann filter paper. This experiment was repeated three times and the results are reported below.

| Experiment No. | Weight of Filter Paper (in g) | Weight of (Filter Paper + Precipitates) (in g) | Weight of Precipitates (in g) | Concordant Reading (in mg) |
|----------------|-------------------------------|------------------------------------------------|-------------------------------|----------------------------|
| 01             | 1.1192 g                      | 1.1916                                         | 0.0724                        | 0.0724                     |
| 02             | 1.0884 g                      | 1.1613                                         | 0.0729                        |                            |
| 03             | 1.0906 g                      | 1.1630                                         | 0.0724                        |                            |



### Calculations:

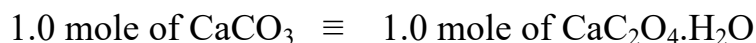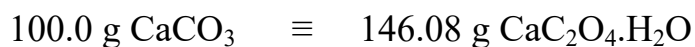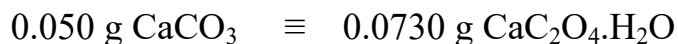

**Therefore, for obtained 72.4 mg CaC<sub>2</sub>O<sub>4</sub>·H<sub>2</sub>O, the equivalent amount of CaCO<sub>3</sub> is 49.6 mg**

- 29) Estimation of Calcium as Calcium Carbonate (CaCO<sub>3</sub>) by using Aq. Solution of Ca<sup>+2</sup> (pH 7) as titrand, Aq. Solution of Na<sub>3</sub>HEDTA (pH 11) as titrant and bromothymol blue as indicator (Stock solution of CaCO<sub>3</sub> was prepared by dissolving 42.0 mg of Egg Shell Powder)

0.0420 g egg shell powder was dissolved in 0.1 mL 11.3N HCl. It was transferred to a 250.0 mL standard volumetric flask and diluted up to the mark with water. Solution was shaken well to make it homogeneous (**Solution A**). Then, 50.0 mL of Solution A was transferred to a 250.0 mL beaker. Then, pH electrode was inserted to this solution and pH value was found to be 2.2. pH of this solution was adjusted to 7 by adding 2.0 mL 0.33 M NaOH solution (**Solution B**). 50.0 mL of solution B was transferred to 250.0 mL conical flask. To this, 3-4 drops of bromothymol blue indicator was added. Colour of solution was colourless to pale green. Aqueous solution of 0.01M Na<sub>3</sub>HEDTA (pH 11) was prepared by mixing 250.0 mL 0.01M Na<sub>2</sub>H<sub>2</sub>EDTA and 15.0 mL 0.33M NaOH solutions. This solution was filled in 25.0 mL burette as titrant. Then, titration was performed by drop wise addition of burette solution to the conical flask. With progress of titration, pH of solution decreases and colour of solution changed from light green to yellow. After surpassing the equivalence point, further addition of Na<sub>3</sub>HEDTA solution caused sharp increase in the pH of solution i.e pH $\geq$ 7.5 and its colour changed from

yellow to intense blue which was detected as end point of the titration. This experiment was repeated three times. Obtained observations are listed below.

**Table 21A (Solution Set-I): Readings of complexometric titration between Aq. Solutions of  $\text{Ca}^{+2}$  and  $\text{Na}_3\text{HEDTA}$  by using bromothymol blue as indicator**

| <b>Experiment No.</b> | <b>Initial Reading (in mL)</b> | <b>Final Reading (in mL)</b> | <b>Difference (in mL)</b> | <b>Concordant Reading (in mL)</b> |
|-----------------------|--------------------------------|------------------------------|---------------------------|-----------------------------------|
| 1                     | 0.0                            | 9.2                          | 9.2                       | 9.2                               |
| 2                     | 0.0                            | 9.2                          | 9.2                       |                                   |
| 3                     | 0.0                            | 9.2                          | 9.2                       |                                   |

**Table 21B (Solution Set-II): Readings of complexometric titration between Aq. Solutions of  $\text{Ca}^{+2}$  and  $\text{Na}_3\text{HEDTA}$  by using bromothymol blue as indicator**

| <b>Experiment No.</b> | <b>Initial Reading (in mL)</b> | <b>Final Reading (in mL)</b> | <b>Difference (in mL)</b> | <b>Concordant Reading (in mL)</b> |
|-----------------------|--------------------------------|------------------------------|---------------------------|-----------------------------------|
| 1                     | 0.0                            | 9.2                          | 9.2                       | 9.2                               |
| 2                     | 0.0                            | 9.2                          | 9.2                       |                                   |
| 3                     | 0.0                            | 9.4                          | 9.4                       |                                   |

**Table 21C (Solution Set-III): Readings of complexometric titration between Aq. Solutions of  $\text{Ca}^{+2}$  and  $\text{Na}_3\text{HEDTA}$  by using bromothymol blue as indicator**

| <b>Experiment No.</b> | <b>Initial Reading (in mL)</b> | <b>Final Reading (in mL)</b> | <b>Difference (in mL)</b> | <b>Concordant Reading (in mL)</b> |
|-----------------------|--------------------------------|------------------------------|---------------------------|-----------------------------------|
| 1                     | 0.0                            | 9.2                          | 9.2                       | 9.2                               |
| 2                     | 0.0                            | 9.4                          | 9.4                       |                                   |
| 3                     | 0.0                            | 9.2                          | 9.2                       |                                   |

**Relative Standard Deviation of Above Nine Readings: 0.95%**

**Theoretical Calculations:**

**Solution B contains 8.4 mg of CaCO<sub>3</sub> (Theoretical Amount)**

**Solution A contains (8.4 x 5) = 42 mg of CaCO<sub>3</sub> (Theoretical Amount)**

**Experimental Calculations:**

**1000.0 mL 1M Na<sub>2</sub>H<sub>2</sub>EDTA ≡ 100.0 g CaCO<sub>3</sub> ≡ 40.0 g Ca<sup>+2</sup>**

**1000.0 mL 0.01M Na<sub>2</sub>H<sub>2</sub>EDTA ≡ 1.0 g CaCO<sub>3</sub> ≡ 0.4 g Ca<sup>+2</sup>**

**1.0 mL 0.01M Na<sub>2</sub>H<sub>2</sub>EDTA ≡ 1.0 mg CaCO<sub>3</sub> ≡ 0.4 mg Ca<sup>+2</sup>**

**9.2 mL 0.01M Na<sub>2</sub>H<sub>2</sub>EDTA ≡ 9.2 mg CaCO<sub>3</sub>**

**Solution B contains 9.2 mg of CaCO<sub>3</sub> (Experimental Amount)**

**Solution A contains (9.2 x 5) = 46.0 mg of CaCO<sub>3</sub> (Experimental Amount)**

**30) Estimation of Calcium as Calcium Carbonate (CaCO<sub>3</sub>) by using conventional complexometric titration method (Stock solution of Egg Shell was prepared by dissolving 42.0 mg of Dry Egg Shell Powder)**

0.042 g dry egg shell powder was dissolved in 0.1 mL 11.3N HCl. It was transferred to a 250.0 mL standard volumetric flask and diluted up to the mark with water. Solution was shaken well to make it homogeneous (**Solution A**). Then, 50.0 mL of Solution A was transferred to a 250.0 mL conical flask (**Solution B**). To this, 1.5 test tube (Approx. 10-12 mL) NH<sub>4</sub>OH-NH<sub>4</sub>Cl buffer (pH 10) was added. Then, 4-5 drops of Eriochrome Black-T indicator was added. Solution in the conical flask was turned wine red and it was shaken well. Aq. Solution of Na<sub>2</sub>H<sub>2</sub>EDTA was filled in 25.0 mL burette. Then, titration was performed by drop wise addition of burette solution to the conical flask. A sharp colour change from wine red to blue was observed at the end point. This experiment was repeated three times. Obtained observations are listed below.

**Table 22: Readings of complexometric titration between Aq. Solutions of  $\text{Ca}^{+2}$  and  $\text{Na}_2\text{H}_2\text{EDTA}$  by using Eriochrome Black-T as indicator**

| Experiment No. | Initial Reading (in mL) | Final Reading (in mL) | Difference (in mL) | Concordant Reading (in mL) |
|----------------|-------------------------|-----------------------|--------------------|----------------------------|
| 1              | 0.0                     | 8.6                   | 8.6                | 8.6                        |
| 2              | 0.0                     | 8.6                   | 8.6                |                            |
| 3              | 0.0                     | 8.6                   | 8.6                |                            |

**Experimental Calculations:**

1000.0 mL 1M  $\text{Na}_2\text{H}_2\text{EDTA}$   $\equiv$  100.0 g  $\text{CaCO}_3$   $\equiv$  40.0 g  $\text{Ca}^{+2}$

1000.0 mL 0.01M  $\text{Na}_2\text{H}_2\text{EDTA}$   $\equiv$  1.0 g  $\text{CaCO}_3$   $\equiv$  0.4 g  $\text{Ca}^{+2}$

1.0 mL 0.01M  $\text{Na}_2\text{H}_2\text{EDTA}$   $\equiv$  1.0 mg  $\text{CaCO}_3$   $\equiv$  0.4 mg  $\text{Ca}^{+2}$

8.6 mL 0.01M  $\text{Na}_2\text{H}_2\text{EDTA}$   $\equiv$  8.6 mg  $\text{CaCO}_3$

Solution B contains 8.6 mg of  $\text{CaCO}_3$  (Experimental Amount)

Solution A contains  $(8.6 \times 5) = 43.0$  mg of  $\text{CaCO}_3$  (Experimental Amount)

**31) Gravimetric Estimation of Calcium in Egg-Shell as Calcium Carbonate ( $\text{CaCO}_3$ )**

(Stock solution of Egg-Shell was prepared by digesting 42.0 mg of Dry Egg-Shell Powder with 1.0 mL Con. HCl)

42.0 mg of dry Egg-Shell powder was taken in 100.0 mL beaker. To this, 1.0 mL Con. HCl was added with stirring followed by addition of 10.0 mL water. Beaker was covered with watch glass and then heated till the solution became clear and carbon dioxide expelled completely. Sides of beaker and watch glass were rinsed with distilled water and diluted up to 50.0 mL. Then, solution was heated to boiling and 2 drops of methyl red indicator was added. To this, 5.0 mL 5% ammonium oxalate solution was added. To the resulted hot solution, (1:1) ammonia solution was added drop wise and with constant stirring until the mixture became neutral (color of solution changes to yellow from red). Formed precipitates

were allowed to settle without further heating for one hour. Precipitates were filtered through previously weighed Whatman filter paper 40 and washed with 0.1% ammonium oxalate solution till it became free from chloride. Precipitates were dried on metallic cone on sand bath. Weight the amount of (Precipitate + Whatmann filter paper) and subtract it from the weight of empty Whatmann filter paper. This experiment was repeated three times and the results are reported below.

| Experiment No. | Weight of Filter Paper (in g) | Weight of (Filter Paper + Precipitates) (in g) | Weight of Precipitates (in g) | Concordant Reading (in mg) |
|----------------|-------------------------------|------------------------------------------------|-------------------------------|----------------------------|
| 01             | 1.0672 g                      | 1.1281                                         | 0.0609                        | 60.9                       |
| 02             | 1.0728 g                      | 1.1337                                         | 0.0609                        |                            |
| 03             | 1.0989 g                      | 1.1604                                         | 0.0615                        |                            |

### Calculations:

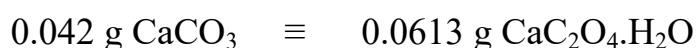

**Therefore, for obtained 60.9 mg CaC<sub>2</sub>O<sub>4</sub>·H<sub>2</sub>O, the equivalent amount of CaCO<sub>3</sub> is 41.7 mg**

- 32) **Estimation of Calcium as Calcium Carbonate (CaCO<sub>3</sub>) by using Aq. Solution of Ca<sup>+2</sup> (pH 7) as titrand, Aq. Solution of Na<sub>3</sub>HEDTA (pH 11) as titrant and bromothymol blue as Indicator (Stock solution of CaCO<sub>3</sub> was prepared by dissolving 48.0 mg of Sea Shell Powder)**

0.048 g sea shell powder was dissolved in 0.2 mL 11.3N HCl. It was transferred to a 250.0 mL standard volumetric flask and diluted up to the mark with water. Solution was shaken well to make it homogeneous (**Solution A**). Then, 50.0 mL of Solution A was transferred to a 250.0

mL beaker. Then, pH electrode was inserted to this solution and pH value was found to be 2.2. pH of this solution was adjusted to 7 by adding 2.0 mL 0.33 M NaOH solution (**Solution B**). 50.0 mL of solution B was transferred to 250.0 mL conical flask. To this, 3-4 drops of bromothymol blue indicator was added. Colour of solution was colourless to pale green. Aqueous solution of 0.01M Na<sub>3</sub>HEDTA (pH 11) was prepared by mixing 250.0 mL 0.01M Na<sub>2</sub>H<sub>2</sub>EDTA and 15.0 mL 0.33M NaOH solutions. This solution was filled in 25.0 mL burette as titrant. Then, titration was performed by drop wise addition of burette solution to the conical flask. With progress of titration, pH of solution decreases and colour of solution changed from light green to yellow. After surpassing the equivalence point, further addition of Na<sub>3</sub>HEDTA solution caused sharp increase in the pH of solution i.e pH $\geq$ 7.5 and its colour changed from yellow to intense blue which was detected as end point of the titration. This experiment was repeated three times. Obtained observations are listed below.

**Table 23A (Solution Set-I): Readings of complexometric titration between Aq. Solutions of Ca<sup>+2</sup> and Na<sub>3</sub>HEDTA by using bromothymol blue as indicator**

| <b>Experiment No.</b> | <b>Initial Reading (in mL)</b> | <b>Final Reading (in mL)</b> | <b>Difference (in mL)</b> | <b>Concordant Reading (in mL)</b> |
|-----------------------|--------------------------------|------------------------------|---------------------------|-----------------------------------|
| <b>1</b>              | <b>0.0</b>                     | <b>10.5</b>                  | <b>10.5</b>               | <b>10.5</b>                       |
| <b>2</b>              | <b>0.0</b>                     | <b>10.5</b>                  | <b>10.5</b>               |                                   |
| <b>3</b>              | <b>0.0</b>                     | <b>10.5</b>                  | <b>10.5</b>               |                                   |

**Table 23B (Solution Set-II): Readings of complexometric titration between Aq. Solutions of Ca<sup>+2</sup> and Na<sub>3</sub>HEDTA by using bromothymol blue as indicator**

| <b>Experiment No.</b> | <b>Initial Reading (in mL)</b> | <b>Final Reading (in mL)</b> | <b>Difference (in mL)</b> | <b>Concordant Reading (in mL)</b> |
|-----------------------|--------------------------------|------------------------------|---------------------------|-----------------------------------|
| <b>1</b>              | <b>0.0</b>                     | <b>10.7</b>                  | <b>10.7</b>               | <b>10.5</b>                       |
| <b>2</b>              | <b>0.0</b>                     | <b>10.5</b>                  | <b>10.5</b>               |                                   |

|   |     |      |      |  |
|---|-----|------|------|--|
| 3 | 0.0 | 10.5 | 10.5 |  |
|---|-----|------|------|--|

**Table 23C (Solution Set-III): Readings of complexometric titration between Aq. Solutions of  $\text{Ca}^{+2}$  and  $\text{Na}_3\text{HEDTA}$  by using bromothymol blue as indicator**

| Experiment No. | Initial Reading (in mL) | Final Reading (in mL) | Difference (in mL) | Concordant Reading (in mL) |
|----------------|-------------------------|-----------------------|--------------------|----------------------------|
| 1              | 0.0                     | 10.5                  | 10.5               | 10.5                       |
| 2              | 0.0                     | 10.5                  | 10.5               |                            |
| 3              | 0.0                     | 10.7                  | 10.7               |                            |

**Relative Standard Deviation of Above Nine Readings: 0.84%**

**Theoretical Calculations:**

Solution B contains 9.6 mg of  $\text{CaCO}_3$  (Theoretical Amount)

Solution A contains  $(9.6 \times 5) = 48$  mg of  $\text{CaCO}_3$  (Theoretical Amount)

**Experimental Calculations:**

1000.0 mL 1M  $\text{Na}_2\text{H}_2\text{EDTA} \equiv 100.0$  g  $\text{CaCO}_3 \equiv 40.0$  g  $\text{Ca}^{+2}$

1000.0 mL 0.01M  $\text{Na}_2\text{H}_2\text{EDTA} \equiv 1.0$  g  $\text{CaCO}_3 \equiv 0.4$  g  $\text{Ca}^{+2}$

1.0 mL 0.01M  $\text{Na}_2\text{H}_2\text{EDTA} \equiv 1.0$  mg  $\text{CaCO}_3 \equiv 0.4$  mg  $\text{Ca}^{+2}$

10.5 mL 0.01M  $\text{Na}_2\text{H}_2\text{EDTA} \equiv 10.5$  mg  $\text{CaCO}_3$

Solution B contains 10.5 mg of  $\text{CaCO}_3$  (Experimental Amount)

Solution A contains  $(10.5 \times 5) = 52.5$  mg of  $\text{CaCO}_3$  (Experimental Amount)

**33) Estimation of Calcium as Calcium Carbonate ( $\text{CaCO}_3$ ) by using conventional complexometric titration method (Stock solution of  $\text{CaCO}_3$  was prepared by dissolving 48.0 mg of Dry Sea Shell Powder)**

0.048 g sea shell powder was dissolved in 0.2 mL 11.3N HCl. It was transferred to a 250.0 mL standard volumetric flask and diluted up to the mark with water. Solution was shaken well to

make it homogeneous (**Solution A**). Then, 50.0 mL of Solution A was transferred to a 250.0 mL conical flask (**Solution B**). To this, 1.5 test tube (Approx. 10-12 mL)  $\text{NH}_4\text{OH-NH}_4\text{Cl}$  buffer (pH 10) was added. Then, 4-5 drops of Eriochrome Black-T indicator was added. Solution in the conical flask was turned wine red and it was shaken well. Aq. Solution of  $\text{Na}_2\text{H}_2\text{EDTA}$  was filled in 25.0 mL burette. Then, titration was performed by drop wise addition of burette solution to the conical flask. A sharp colour change from wine red to blue was observed at the end point. This experiment was repeated three times. Obtained observations are listed below.

**Table 24: Readings of complexometric titration between Aq. Solutions of  $\text{Ca}^{+2}$  and  $\text{Na}_2\text{H}_2\text{EDTA}$  by using Eriochrome Black-T as indicator**

| Experiment No. | Initial Reading (in mL) | Final Reading (in mL) | Difference (in mL) | Concordant Reading (in mL) |
|----------------|-------------------------|-----------------------|--------------------|----------------------------|
| 1              | 0.0                     | 9.8                   | 9.8                | 9.8                        |
| 2              | 0.0                     | 9.8                   | 9.8                |                            |
| 3              | 0.0                     | 9.8                   | 9.8                |                            |

**Experimental Calculations:**

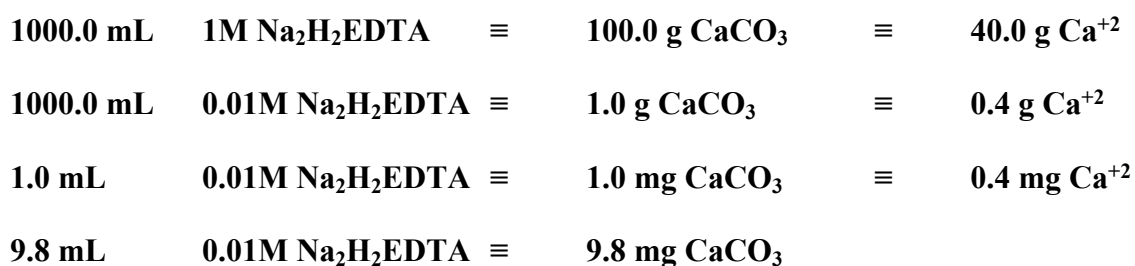

**Solution B contains 9.8 mg of  $\text{CaCO}_3$  (Experimental Amount)**

**Solution A contains  $(9.8 \times 5) = 49.0$  mg of  $\text{CaCO}_3$  (Experimental Amount)**



### 34) Gravimetric Estimation of Calcium in Sea-Shell as Calcium Carbonate (CaCO<sub>3</sub>)

(Stock solution of Sea-Shell was prepared by digesting 48.0 mg of Dry Sea-Shell Powder with 1.0 mL Con. HCl)

48.0 mg of dry Sea-Shell powder was taken in 100.0 mL beaker. To this, 1.0 mL Con. HCl was added with stirring followed by addition of 10.0 mL water. Beaker was covered with watch glass and then heated till the solution became clear and carbon dioxide expelled completely. Sides of beaker and watch glass were rinsed with distilled water and diluted up to 50.0 mL. Then, solution was heated to boiling and 2 drops of methyl red indicator was added. To this, 5.0 mL 5% ammonium oxalate solution was added. To the resulted hot solution, (1:1) ammonia solution was added drop wise and with constant stirring until the mixture became neutral (color of solution changes to yellow from red). Formed precipitates were allowed to settle without further heating for one hour. Precipitates were filtered through previously weighed Whatman filter paper 40 and washed with 0.1% ammonium oxalate solution till it became free from chloride. Precipitates were dried on metallic cone on sand bath. Weight the amount of (Precipitate + Whatmann filter paper) and subtract it from the weight of empty Whatmann filter paper. This experiment was repeated three times and the results are reported below.

| Experiment No. | Weight of Filter Paper (in g) | Weight of (Filter Paper + Precipitates) (in g) | Weight of Precipitates (in g) | Concordant Reading (in mg) |
|----------------|-------------------------------|------------------------------------------------|-------------------------------|----------------------------|
| 01             | 1.1071                        | 1.1778                                         | 0.0707                        | 70.7                       |
| 02             | 1.0803                        | 1.1515                                         | 0.0712                        |                            |
| 03             | 1.0821                        | 1.1528                                         | 0.0707                        |                            |

### Calculations:

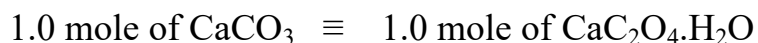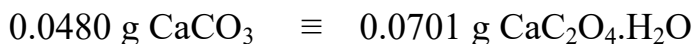

**Therefore, for obtained 70.7 mg CaC<sub>2</sub>O<sub>4</sub>·H<sub>2</sub>O, the equivalent amount of CaCO<sub>3</sub> is 48.4 mg**

**35) Estimation of Calcium as Calcium Carbonate (CaCO<sub>3</sub>) by using Aq. Solution of Ca<sup>+2</sup> (pH 7) as titrand, Aq. Solution of Na<sub>3</sub>HEDTA (pH 11) as titrant and bromothymol blue as indicator (Stock solution of CaCO<sub>3</sub> was prepared by dissolving 40.0 mg of Calcium Tablet Powder)**

0.040 g calcium tablet powder was dissolved in 0.1 mL 11.3N HCl. It was transferred to a 250.0 mL standard volumetric flask and diluted up to the mark with water. Solution was shaken well to make it homogeneous (**Solution A**). Then, 50.0 mL of Solution A was transferred to a 250.0 mL beaker. Then, pH electrode was inserted to this solution and pH value was found to be 2.2. pH of this solution was adjusted to 7 by adding 2.0 mL 0.33 M NaOH solution (**Solution B**). 50.0 mL of solution B was transferred to 250.0 mL conical flask. To this, 3-4 drops of bromothymol blue indicator was added. Colour of solution was colourless to pale green. Aqueous solution of 0.01M Na<sub>3</sub>HEDTA (pH 11) was prepared by mixing 250.0 mL 0.01M Na<sub>2</sub>H<sub>2</sub>EDTA and 15.0 mL 0.33M NaOH solutions. This solution was filled in 25.0 mL burette as titrant. Then, titration was performed by drop wise addition of burette solution to the conical flask. With progress of titration, pH of solution decreases and colour of solution changed from light green to yellow. After surpassing the equivalence point, further addition of Na<sub>3</sub>HEDTA solution caused sharp increase in the pH of solution i.e pH<sub>≥</sub>7.5 and its colour changed from

yellow to intense blue which was detected as end point of the titration. This experiment was repeated three times. Obtained observations are listed below.

**Table 25A (Solution Set-I): Readings of complexometric titration between Aq. Solutions of  $\text{Ca}^{+2}$  and  $\text{Na}_3\text{HEDTA}$  by using bromothymol blue as indicator**

| Experiment No. | Initial Reading (in mL) | Final Reading (in mL) | Difference (in mL) | Concordant Reading (in mL) |
|----------------|-------------------------|-----------------------|--------------------|----------------------------|
| 1              | 0.0                     | 8.9                   | 8.9                | 8.9                        |
| 2              | 0.0                     | 8.9                   | 8.9                |                            |
| 3              | 0.0                     | 8.9                   | 8.9                |                            |

**Table 25B (Solution Set-II): Readings of complexometric titration between Aq. Solutions of  $\text{Ca}^{+2}$  and  $\text{Na}_3\text{HEDTA}$  by using bromothymol blue as indicator**

| Experiment No. | Initial Reading (in mL) | Final Reading (in mL) | Difference (in mL) | Concordant Reading (in mL) |
|----------------|-------------------------|-----------------------|--------------------|----------------------------|
| 1              | 0.0                     | 9.0                   | 9.0                | 8.9                        |
| 2              | 0.0                     | 8.9                   | 8.9                |                            |
| 3              | 0.0                     | 8.9                   | 8.9                |                            |

**Table 25C (Solution Set-III): Readings of complexometric titration between Aq. Solutions of  $\text{Ca}^{+2}$  and  $\text{Na}_3\text{HEDTA}$  by using bromothymol blue as indicator**

| Experiment No. | Initial Reading (in mL) | Final Reading (in mL) | Difference (in mL) | Concordant Reading (in mL) |
|----------------|-------------------------|-----------------------|--------------------|----------------------------|
| 1              | 0.0                     | 8.9                   | 8.9                | 8.9                        |
| 2              | 0.0                     | 9.1                   | 9.1                |                            |
| 3              | 0.0                     | 8.9                   | 8.9                |                            |

**Relative Standard Deviation of Above Nine Readings: 0.99%**

**Theoretical Calculations:**

**Solution B contains 8.0 mg of CaCO<sub>3</sub> (Theoretical Amount)**

**Solution A contains (8.0 x 5) = 40 mg of CaCO<sub>3</sub> (Theoretical Amount)**

**Experimental Calculations:**

**1000.0 mL 1M Na<sub>2</sub>H<sub>2</sub>EDTA ≡ 100.0 g CaCO<sub>3</sub> ≡ 40.0 g Ca<sup>+2</sup>**

**1000.0 mL 0.01M Na<sub>2</sub>H<sub>2</sub>EDTA ≡ 1.0 g CaCO<sub>3</sub> ≡ 0.4 g Ca<sup>+2</sup>**

**1.0 mL 0.01M Na<sub>2</sub>H<sub>2</sub>EDTA ≡ 1.0 mg CaCO<sub>3</sub> ≡ 0.4 mg Ca<sup>+2</sup>**

**8.9 mL 0.01M Na<sub>2</sub>H<sub>2</sub>EDTA ≡ 8.9 mg CaCO<sub>3</sub>**

**Solution B contains 8.9 mg of CaCO<sub>3</sub> (Experimental Amount)**

**Solution A contains (8.9 x 5) = 44.5 mg of CaCO<sub>3</sub> (Experimental Amount)**

**36) Estimation of Calcium as Calcium Carbonate (CaCO<sub>3</sub>) by using conventional complexometric titration method (Stock solution of CaCO<sub>3</sub> was prepared by dissolving 40.0 mg of Dry Calcium Tablet Powder)**

0.040 g sea shell powder was dissolved in 0.1 mL 11.3N HCl. It was transferred to a 250.0 mL standard volumetric flask and diluted up to the mark with water. Solution was shaken well to make it homogeneous (**Solution A**). Then, 50.0 mL of Solution A was transferred to a 250.0 mL conical flask (**Solution B**). To this, 1.5 test tube (Approx. 10-12 mL) NH<sub>4</sub>OH-NH<sub>4</sub>Cl buffer (pH 10) was added. Then, 4-5 drops of Eriochrome Black-T indicator was added. Solution in the conical flask was turned wine red and it was shaken well. Aq. Solution of Na<sub>2</sub>H<sub>2</sub>EDTA was filled in 25.0 mL burette. Then, titration was performed by drop wise addition of burette solution to the conical flask. A sharp colour change from wine red to blue was observed at the end point. This experiment was repeated three times. Obtained observations are listed below.

**Table 26: Readings of complexometric titration between Aq. Solutions of  $\text{Ca}^{+2}$  and  $\text{Na}_2\text{H}_2\text{EDTA}$  by using Eriochrome Black-T as indicator**

| Experiment No. | Initial Reading (in mL) | Final Reading (in mL) | Difference (in mL) | Concordant Reading (in mL) |
|----------------|-------------------------|-----------------------|--------------------|----------------------------|
| 1              | 0.0                     | 8.2                   | 8.2                | 8.2                        |
| 2              | 0.0                     | 8.2                   | 8.2                |                            |
| 3              | 0.0                     | 8.2                   | 8.2                |                            |

**Experimental Calculations:**

$$1000.0 \text{ mL } 1\text{M Na}_2\text{H}_2\text{EDTA} \equiv 100.0 \text{ g CaCO}_3 \equiv 40.0 \text{ g Ca}^{+2}$$

$$1000.0 \text{ mL } 0.01\text{M Na}_2\text{H}_2\text{EDTA} \equiv 1.0 \text{ g CaCO}_3 \equiv 0.4 \text{ g Ca}^{+2}$$

$$1.0 \text{ mL } 0.01\text{M Na}_2\text{H}_2\text{EDTA} \equiv 1.0 \text{ mg CaCO}_3 \equiv 0.4 \text{ mg Ca}^{+2}$$

$$8.2 \text{ mL } 0.01\text{M Na}_2\text{H}_2\text{EDTA} \equiv 8.2 \text{ mg CaCO}_3$$

Solution B contains 8.2 mg of  $\text{CaCO}_3$  (Experimental Amount)

Solution A contains  $(8.2 \times 5) = 41.0$  mg of  $\text{CaCO}_3$  (Experimental Amount)

**37) Gravimetric Estimation of Calcium in Calcium Tablet as Calcium Carbonate ( $\text{CaCO}_3$ ) (Stock solution of Calcium Tablet was prepared by digesting 40.0 mg of Dry Calcium Tablet Powder with 1.0 mL Con. HCl)**

40.0 mg of dry Calcium Tablet powder was taken in 100.0 mL beaker. To this, 1.0 mL Con. HCl was added with stirring followed by addition of 10.0 mL water. Beaker was covered with watch glass and then heated till the solution became clear and carbon dioxide expelled completely. Sides of beaker and watch glass were rinsed with distilled water and diluted up to 50.0 mL. Then, solution was heated to boiling and 2 drops of methyl red indicator was added. To this, 5.0 mL 5% ammonium oxalate solution was added. To the resulted hot solution, (1:1) ammonia solution was added drop wise and with constant stirring until the mixture became neutral (color of solution changes to yellow from red). Formed precipitates

were allowed to settle without further heating for one hour. Precipitates were filtered through previously weighed Whatman filter paper 40 and washed with 0.1% ammonium oxalate solution till it became free from chloride. Precipitates were dried on metallic cone on sand bath. Weight the amount of (Precipitate + Whatmann filter paper) and subtract it from the weight of empty Whatmann filter paper. This experiment was repeated three times and the results are reported below.

| Experiment No. | Weight of Filter Paper (in g) | Weight of (Filter Paper + Precipitates) (in g) | Weight of Precipitates (in g) | Concordant Reading (in mg) |
|----------------|-------------------------------|------------------------------------------------|-------------------------------|----------------------------|
| 01             | 1.0772                        | 1.1352                                         | 0.0580                        | 58.0                       |
| 02             | 1.1129                        | 1.1717                                         | 0.0588                        |                            |
| 03             | 1.0697                        | 1.1277                                         | 0.0580                        |                            |

### Calculations:

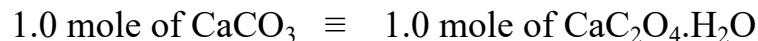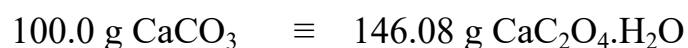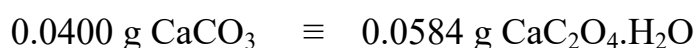

**Therefore, for obtained 58.0 mg CaC<sub>2</sub>O<sub>4</sub>·H<sub>2</sub>O, the equivalent amount of CaCO<sub>3</sub> is 39.7 mg**

**38) pH-Metric Estimation of Lithium as Lithium Carbonate (Li<sub>2</sub>CO<sub>3</sub>) by using Aq. Solution of Li<sup>+</sup> (pH 7) as titrand and Aq. Solution of Na<sub>3</sub>HEDTA (pH 11) as titrant (Stock solution of Lithium Carbonate was prepared by dissolving 55.0 mg of Dry Lithium Carbonate Powder)**

0.055 g dry lithium carbonate powder was dissolved in 0.2 mL 11.3N HCl. It was transferred to a 250.0 mL standard volumetric flask and diluted up to the mark with water. Solution was shaken well to make it homogeneous (**Solution A**). Then, 50.0 mL of Solution A was

transferred to a 100.0 mL beaker. Then, pH electrode was inserted to this solution and pH value was found to be 3.2. pH of this solution was adjusted to 7 by adding 2.0 mL 0.33 M NaOH solution (**Solution B**). Aqueous solution of 0.01M Na<sub>3</sub>HEDTA (pH 11) was prepared by mixing 250.0 mL 0.01M Na<sub>2</sub>H<sub>2</sub>EDTA and 15.0 mL 0.33M NaOH solutions. This solution was filled in 25.0 mL burette as titrant. Then, 0.5 mL 0.01M Na<sub>3</sub>HEDTA was added to Solution B having pH 7. Solution was shaken well with the help of glass rod and then pH reading was measured. Same process was repeated by adding 0.5 mL 0.01M Na<sub>3</sub>HEDTA from burette up to 9.0 mL and pH reading was measured after each 0.5 mL addition of burette solution. Obtained readings and graph are described below.

**Table 27: Readings of pH-Metric Titration between Aq. Solutions of Li<sup>+</sup> (present in Lithium Carbonate) and Na<sub>3</sub>HEDTA**

| Sr. No. | Volume of 0.01M Na <sub>3</sub> HEDTA (in mL) | pH    |
|---------|-----------------------------------------------|-------|
| 1       | 0                                             | 7.06  |
| 2       | 0.5                                           | 7.49  |
| 3       | 1                                             | 8.2   |
| 4       | 1.5                                           | 8.59  |
| 5       | 2                                             | 9.02  |
| 6       | 2.5                                           | 9.42  |
| 7       | 3                                             | 9.74  |
| 8       | 3.5                                           | 9.82  |
| 9       | 4                                             | 9.93  |
| 10      | 4.5                                           | 9.97  |
| 11      | 5                                             | 10.04 |
| 12      | 5.5                                           | 10.08 |
| 13      | 6                                             | 10.12 |
| 14      | 6.5                                           | 10.15 |
| 15      | 7                                             | 10.19 |
| 16      | 7.5                                           | 10.24 |
| 17      | 8                                             | 10.34 |
| 18      | 8.5                                           | 10.42 |
| 19      | 9                                             | 10.52 |

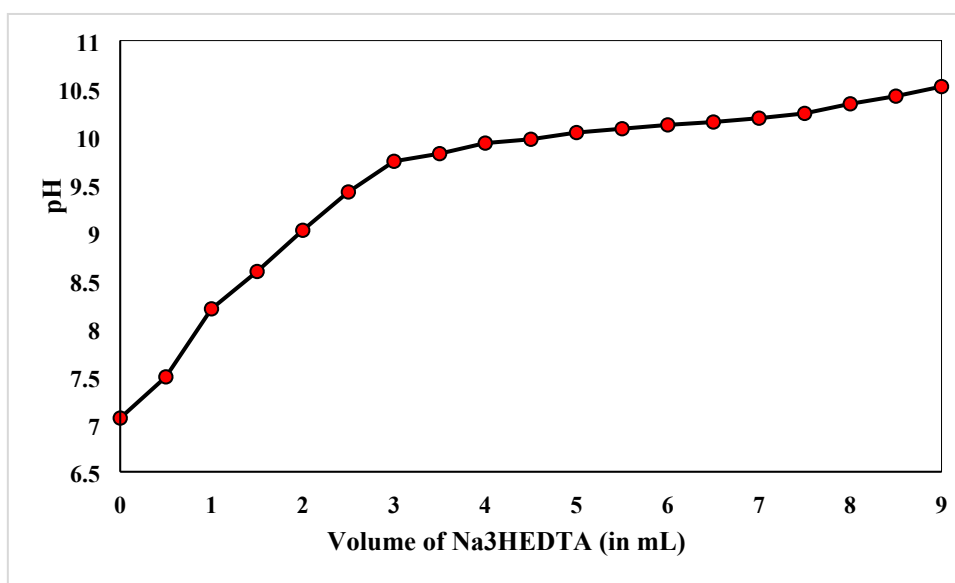

**Figure 10:** Effect of Aq. Na<sub>3</sub>HEDTA Addition on pH of Li<sup>+</sup> Solution

During this titration, release of one H<sup>+</sup> ion was not taking place and hence decrease in pH was not observed. However, continuous increase in pH was observed. No sharp equivalence point was observed.

**39) pH-Metric Estimation of Sodium as Sodium Chloride (NaCl) by using Aq. Solution of Na<sup>+</sup> (pH 7) as titrand and Aq. Solution of Na<sub>3</sub>HEDTA (pH 11) as titrant (Stock solution of Sodium Chloride was prepared by dissolving 29.2 mg of Sodium Chloride Powder)**

0.0292 g dry sodium chloride powder was dissolved in pure water. It was transferred to a 250.0 mL standard volumetric flask and diluted up to the mark with water. Solution was shaken well to make it homogeneous (**Solution A**). Then, 50.0 mL of Solution A was transferred to a 100.0 mL beaker. Then, pH electrode was inserted to this solution and pH value was found to be 6.7. pH of this solution was adjusted to 7 by adding 0.2 mL 0.33 M NaOH solution (**Solution B**). Aqueous solution of 0.01M Na<sub>3</sub>HEDTA (pH 11) was prepared by mixing 250.0 mL 0.01M Na<sub>2</sub>H<sub>2</sub>EDTA and 15.0 mL 0.33M NaOH solutions. This solution was filled in 25.0 mL burette as titrant. Then, 0.5 mL 0.01M Na<sub>3</sub>HEDTA was added to Solution B having pH 7. Solution was shaken well with the help of glass rod and then pH reading was measured. Same process



was repeated by adding 0.5 mL 0.01M Na<sub>3</sub>HEDTA from burette up to 12.0 mL and pH reading was measured after each 0.5 mL addition of burette solution. Obtained readings and graph are described below.

**Table 28: Readings of pH-Metric Titration between Aq. Solutions of Na<sup>+</sup> (present in Sodium Chloride) and Na<sub>3</sub>HEDTA**

| <b>Sr. No.</b> | <b>Volume of 0.01M Na<sub>3</sub>HEDTA (in mL)</b> | <b>pH</b> |
|----------------|----------------------------------------------------|-----------|
| 1              | 0                                                  | 7.09      |
| 2              | 0.5                                                | 7.2       |
| 3              | 1                                                  | 7.3       |
| 4              | 1.5                                                | 7.6       |
| 5              | 2                                                  | 8.3       |
| 6              | 2.5                                                | 8.75      |
| 7              | 3                                                  | 9.3       |
| 8              | 3.5                                                | 9.47      |
| 9              | 4                                                  | 9.72      |
| 10             | 4.5                                                | 9.77      |
| 11             | 5                                                  | 9.85      |
| 12             | 5.5                                                | 9.91      |
| 13             | 6                                                  | 9.98      |
| 14             | 6.5                                                | 10.03     |
| 15             | 7                                                  | 10.08     |
| 16             | 7.5                                                | 10.12     |
| 17             | 8                                                  | 10.16     |
| 18             | 8.5                                                | 10.2      |
| 19             | 9                                                  | 10.26     |

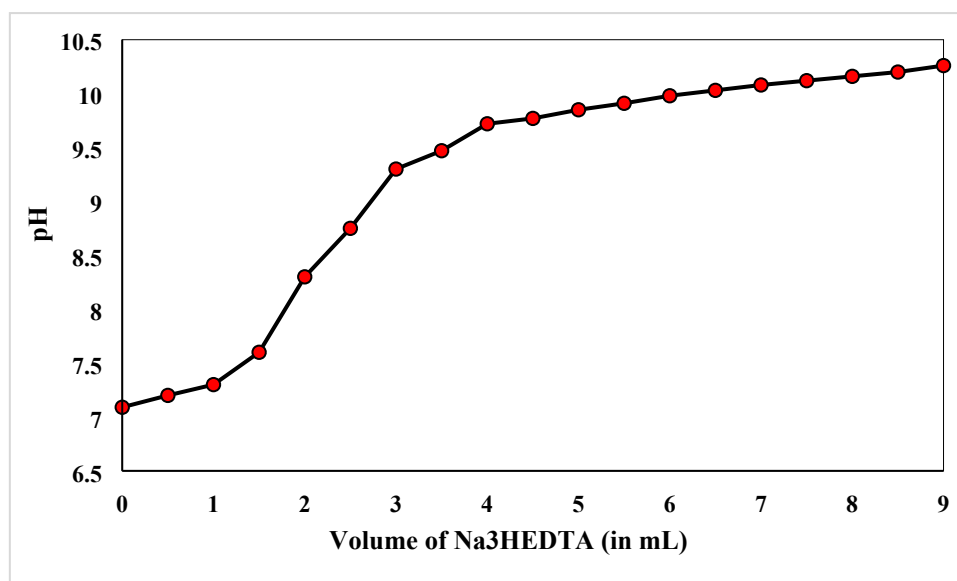

**Figure 11:** Effect of Aq. Na<sub>3</sub>HEDTA Addition on pH of Na<sup>+</sup> Solution

During this titration, release of one H<sup>+</sup> ion was not taking place and hence decrease in pH was not observed. However, continuous increase in pH was observed. No sharp equivalence point was observed.

**40) pH-Metric Estimation of Potassium as Potassium Chloride (KCl) by using Aq. Solution of K<sup>+</sup> (pH 7) as titrand and Aq. Solution of Na<sub>3</sub>HEDTA (pH 11) as titrant (Stock solution of Potassium Chloride was prepared by dissolving 37.2 mg of Potassium Chloride Powder)**

0.0372 g dry potassium chloride powder was dissolved in pure water. It was transferred to a 250.0 mL standard volumetric flask and diluted up to the mark with water. Solution was shaken well to make it homogeneous (**Solution A**). Then, 50.0 mL of Solution A was transferred to a 100.0 mL beaker. Then, pH electrode was inserted to this solution and pH value was found to be 6.5. pH of this solution was adjusted to 7 by adding 0.2 mL 0.33 M NaOH solution (**Solution B**). Aqueous solution of 0.01M Na<sub>3</sub>HEDTA (pH 11) was prepared by mixing 250.0 mL 0.01M Na<sub>2</sub>H<sub>2</sub>EDTA and 15.0 mL 0.33M NaOH solutions. This solution was filled in 25.0 mL burette as titrant. Then, 0.5 mL 0.01M Na<sub>3</sub>HEDTA was added to Solution B having pH 7. Solution was shaken well with the help of glass rod and then pH reading was measured. Same process

was repeated by adding 0.5 mL 0.01M Na<sub>3</sub>HEDTA from burette up to 12.0 mL and pH reading was measured after each 0.5 mL addition of burette solution. Obtained readings and graph are described below.

**Table 29: Readings of pH-Metric Titration between Aq. Solutions of K<sup>+</sup> (present in Potassium Chloride) and Na<sub>3</sub>HEDTA**

| Sr. No. | Volume of 0.01M Na <sub>3</sub> HEDTA (in mL) | pH    |
|---------|-----------------------------------------------|-------|
| 1       | 0                                             | 7.08  |
| 2       | 0.5                                           | 7.2   |
| 3       | 1                                             | 7.3   |
| 4       | 1.5                                           | 7.41  |
| 5       | 2                                             | 7.67  |
| 6       | 2.5                                           | 8.1   |
| 7       | 3                                             | 9.11  |
| 8       | 3.5                                           | 9.41  |
| 9       | 4                                             | 9.61  |
| 10      | 4.5                                           | 9.74  |
| 11      | 5                                             | 9.83  |
| 12      | 5.5                                           | 9.89  |
| 13      | 6                                             | 9.99  |
| 14      | 6.5                                           | 10.05 |
| 15      | 7                                             | 10.09 |
| 16      | 7.5                                           | 10.13 |
| 17      | 8                                             | 10.17 |
| 18      | 8.5                                           | 10.2  |
| 19      | 9                                             | 10.24 |

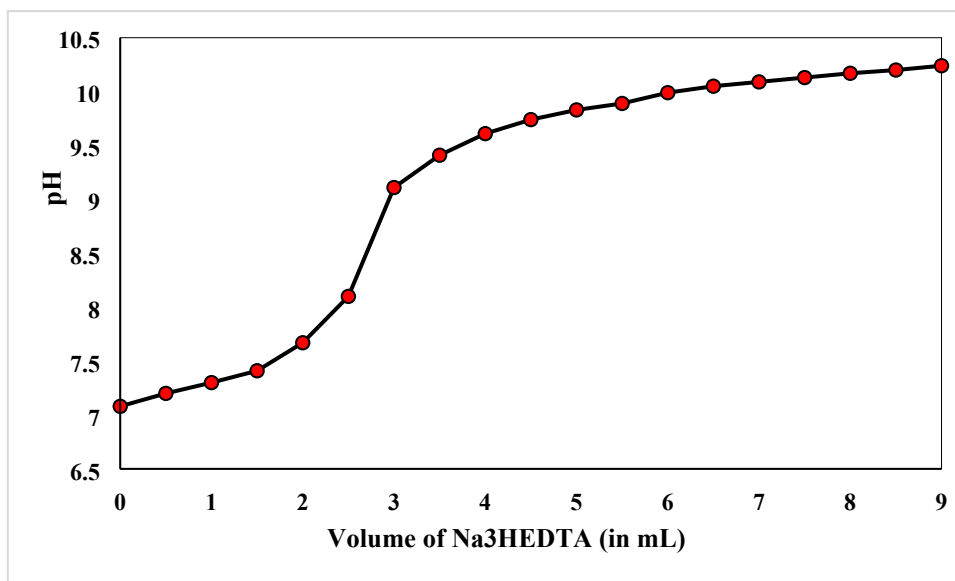

**Figure 12:** Effect of Aq. Na<sub>3</sub>HEDTA Addition on pH of K<sup>+</sup> Solution

During this titration, release of one H<sup>+</sup> ion was not taking place and hence decrease in pH was not observed. However, continuous increase in pH was observed. No sharp equivalence point was observed.

**41) pH-Metric Estimation of Metal Ions from the mixture of (Ca<sup>+2</sup> and Mg<sup>+2</sup>). Aq. Solution of Ca<sup>+2</sup> and Mg<sup>+2</sup> was prepared by mixing 0.0375 g CaCO<sub>3</sub> and 0.0298 g MgCO<sub>3</sub> respectively. pH of this solution was adjusted to 7 and then it was taken as titrand and Aq. Solution of Na<sub>3</sub>HEDTA (pH 11) was taken as titrant**

0.0375 g CaCO<sub>3</sub> and 0.0298 g MgCO<sub>3</sub> powder was mixed well and then dissolved in 0.2 mL 11.3N HCl. It was transferred to a 250.0 mL standard volumetric flask and diluted up to the mark with water. Solution was shaken well to make it homogeneous (**Solution A**). Then, 50.0 mL of Solution A was transferred to a 100.0 mL beaker. Then, pH electrode was inserted to this solution and pH value was found to be 2.2. pH of this solution was adjusted to 7 by adding 3.0 mL 0.33 M NaOH solution (**Solution B**). Aqueous solution of 0.01M Na<sub>3</sub>HEDTA (pH 11) was prepared by mixing 250.0 mL 0.01M Na<sub>2</sub>H<sub>2</sub>EDTA and 15.0 mL 0.33M NaOH solutions. This solution was filled in 25.0 mL burette as titrant. Then, 0.5 mL 0.01M Na<sub>3</sub>HEDTA was added to Solution B having pH 7. Solution was shaken well with the help of glass rod and then

pH reading was measured. Same process was repeated by adding 0.5 mL 0.01M Na<sub>3</sub>HEDTA from burette up to 19.0 mL and pH reading was measured after each 0.5 mL addition of burette solution. Obtained readings and graph are described below.

**Table 30: pH-Metric Titration Readings between Aq. Solutions of (Ca<sup>+2</sup> + Mg<sup>+2</sup>) and Na<sub>3</sub>HEDTA**

| Sr. No. | Volume of 0.01M Na <sub>3</sub> HEDTA (in mL) | pH   |
|---------|-----------------------------------------------|------|
| 1       | 0                                             | 7.05 |
| 2       | 0.5                                           | 7    |
| 3       | 1                                             | 6.96 |
| 4       | 1.5                                           | 6.89 |
| 5       | 2                                             | 6.84 |
| 6       | 2.5                                           | 6.79 |
| 7       | 3                                             | 6.73 |
| 8       | 3.5                                           | 6.68 |
| 9       | 4                                             | 6.64 |
| 10      | 4.5                                           | 6.6  |
| 11      | 5                                             | 6.55 |
| 12      | 5.5                                           | 6.53 |
| 13      | 6                                             | 6.49 |
| 14      | 6.5                                           | 6.45 |
| 15      | 7                                             | 6.43 |
| 16      | 7.5                                           | 6.4  |
| 17      | 8                                             | 6.37 |
| 18      | 8.5                                           | 6.34 |
| 19      | 9                                             | 6.31 |
| 20      | 9.5                                           | 6.29 |
| 21      | 10                                            | 6.27 |
| 22      | 10.5                                          | 6.25 |
| 23      | 11                                            | 6.22 |
| 24      | 11.5                                          | 6.2  |
| 25      | 12                                            | 6.18 |
| 26      | 12.5                                          | 6.16 |
| 27      | 13                                            | 6.15 |
| 28      | 13.5                                          | 6.13 |
| 29      | 14                                            | 6.12 |
| 30      | 14.5                                          | 6.1  |
| 31      | 15                                            | 6.68 |
| 32      | 15.5                                          | 6.98 |

|    |      |      |
|----|------|------|
| 33 | 16   | 7.3  |
| 34 | 16.5 | 8.22 |
| 35 | 17   | 8.74 |
| 36 | 17.5 | 9.28 |
| 37 | 18   | 9.59 |
| 38 | 18.5 | 9.75 |
| 39 | 19   | 9.89 |

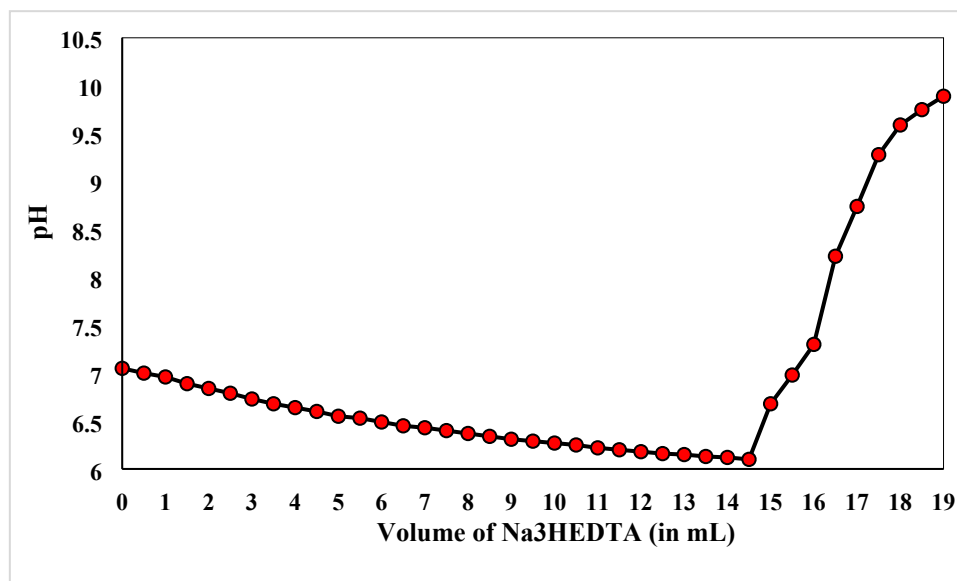

**Figure 13:** Effect of Aq.Na<sub>3</sub>HEDTA Addition on pH of (Ca<sup>+2</sup> + Mg<sup>+2</sup>) Solution

**Observations:** During this titration, formation of Ca- and Mg-EDTA complexes and release of one H<sup>+</sup> ion was taking place and hence decrease in pH from 7.04 to 6.10 was observed. At equivalence point, release of H<sup>+</sup> ion was stopped and sharp increase in pH was observed from 6.10 to 6.68 with further 0.5 mL addition of Na<sub>3</sub>HEDTA (pH 11). Upon subsequent addition of Na<sub>3</sub>HEDTA solution, pH value of solution significantly jumped to 6.98, 7.30 and 8.22. So sharp equivalence point for the titration was observed at 14.5 mL.

**Theoretical Calculations:**

**Solution B contains 7.5 mg of CaCO<sub>3</sub> (Theoretical Amount)**

**Solution B contains 5.9 mg of MgCO<sub>3</sub> (Theoretical Amount)**

**1.0 mL      0.01M Na<sub>3</sub>HEDTA    ≡      1.0 mg CaCO<sub>3</sub>            ≡      0.84 mg MgCO<sub>3</sub>**

**Expected equivalence point is (7.5 + 7.0) mL = 14.5 mL Na<sub>3</sub>HEDTA (Theoretical)**

**Solution A contains (13.4 x 5) = 67.0 mg of Total (Ca<sup>+2</sup> + Mg<sup>+2</sup>) content (Theoretical Amount)**

**Experimental Calculations:**

**1000.0 mL 1M Na<sub>3</sub>HEDTA ≡ 100.0 g CaCO<sub>3</sub> ≡ 40.0 g Ca<sup>+2</sup>**

**1000.0 mL 1M Na<sub>3</sub>HEDTA ≡ 84.31 g MgCO<sub>3</sub> ≡ 24.3 g Mg<sup>+2</sup>**

**1000.0 mL 0.01M Na<sub>3</sub>HEDTA ≡ 1.0 g CaCO<sub>3</sub> ≡ 0.84 g MgCO<sub>3</sub>**

**1.0 mL 0.01M Na<sub>3</sub>HEDTA ≡ 1.0 mg CaCO<sub>3</sub> ≡ 0.84 mg MgCO<sub>3</sub>**

**Experimental equivalence point: 14.5 mL, which was utilized to form complexes with 7.4 mg CaCO<sub>3</sub> and 5.9 mg of MgCO<sub>3</sub>**

**Theoretical and experimental equivalence point shows very good agreement**

**42) pH-Metric Estimation of Metal Ions from the mixture of (Ca<sup>+2</sup> and Ba<sup>+2</sup>). Aq. Solution of Ca<sup>+2</sup> and Ba<sup>+2</sup> was prepared by mixing 0.0375 g CaCO<sub>3</sub> and 0.0490 g BaCO<sub>3</sub> respectively. pH of this solution was adjusted to 7 and then it was taken as titrand and Aq. Solution of Na<sub>3</sub>HEDTA (pH 11) was taken as titrant**

0.0375 g CaCO<sub>3</sub> and 0.0490 g BaCO<sub>3</sub> powder was mixed well and then dissolved in 0.2 mL 11.3N HCl. It was transferred to a 250.0 mL standard volumetric flask and diluted up to the mark with water. Solution was shaken well to make it homogeneous (**Solution A**). Then, 50.0 mL of Solution A was transferred to a 100.0 mL beaker. Then, pH electrode was inserted to this solution and pH value was found to be 2.5. pH of this solution was adjusted to 7 by adding 3.0 mL 0.33 M NaOH solution (**Solution B**). Aqueous solution of 0.01M Na<sub>3</sub>HEDTA (pH 11) was prepared by mixing 250.0 mL 0.01M Na<sub>2</sub>H<sub>2</sub>EDTA and 15.0 mL 0.33M NaOH solutions. This solution was filled in 25.0 mL burette as titrant. Then, 0.5 mL 0.01M Na<sub>3</sub>HEDTA was added to Solution B having pH 7. Solution was shaken well with the help of glass rod and then pH reading was measured. Same process was repeated by adding 0.5 mL 0.01M Na<sub>3</sub>HEDTA from burette up to 17.0 mL and pH reading was measured after each 0.5 mL addition of burette solution. Obtained readings and graph are described below.

**Table 31: pH-Metric Titration Readings between Aq. Solutions of (Ca<sup>+2</sup> + Ba<sup>+2</sup>) and Na<sub>3</sub>HEDTA**

| <b>Sr. No.</b> | <b>Volume of 0.01M Na<sub>3</sub>HEDTA (in mL)</b> | <b>pH</b>   |
|----------------|----------------------------------------------------|-------------|
| 1              | 0                                                  | 7.09        |
| 2              | 0.5                                                | 7.02        |
| 3              | 1                                                  | 6.98        |
| 4              | 1.5                                                | 6.94        |
| 5              | 2                                                  | 6.9         |
| 6              | 2.5                                                | 6.85        |
| 7              | 3                                                  | 6.81        |
| 8              | 3.5                                                | 6.78        |
| 9              | 4                                                  | 6.73        |
| 10             | 4.5                                                | 6.69        |
| 11             | 5                                                  | 6.65        |
| 12             | 5.5                                                | 6.61        |
| 13             | 6                                                  | 6.57        |
| 14             | 6.5                                                | 6.52        |
| 15             | 7                                                  | 6.48        |
| 16             | 7.5                                                | 6.44        |
| 17             | 8                                                  | 6.39        |
| 18             | 8.5                                                | 6.34        |
| 19             | 9                                                  | 6.31        |
| 20             | 9.5                                                | 6.29        |
| 21             | 10                                                 | 6.28        |
| 22             | 10.5                                               | 6.26        |
| 23             | 11                                                 | 6.24        |
| 24             | 11.5                                               | 6.22        |
| 25             | 12                                                 | 6.2         |
| <b>26</b>      | <b>12.5</b>                                        | <b>6.18</b> |
| 27             | 13                                                 | 6.77        |
| 28             | 13.5                                               | 7.08        |
| 29             | 14                                                 | 7.39        |
| 30             | 14.5                                               | 7.64        |
| 31             | 15                                                 | 7.92        |
| 32             | 15.5                                               | 8.38        |
| 33             | 16                                                 | 8.85        |
| 34             | 16.5                                               | 9.05        |
| 35             | 17                                                 | 9.39        |



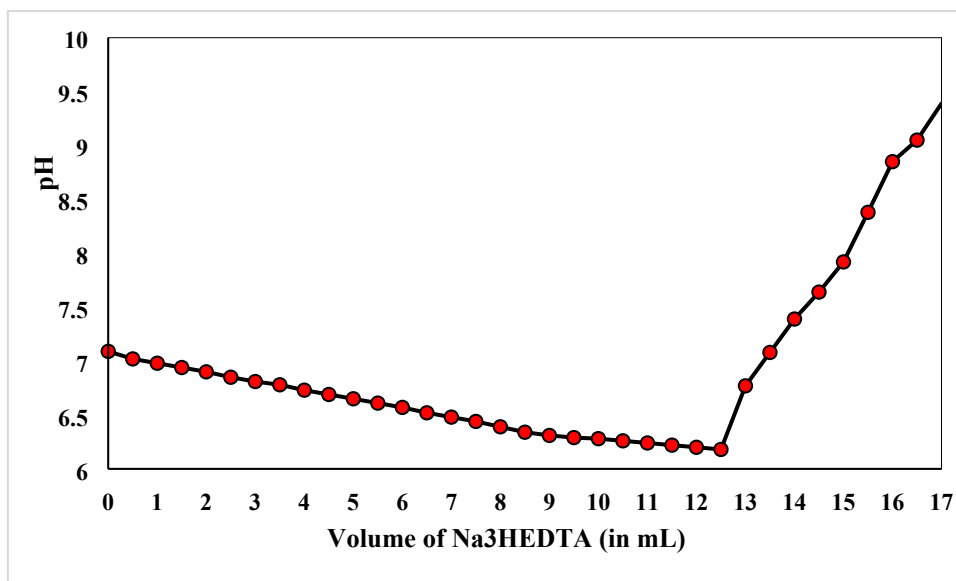

**Figure 14:** Effect of Aq.Na<sub>3</sub>HEDTA Addition on pH of (Ca<sup>+2</sup> + Ba<sup>+2</sup>) Solution

**Observations:** During this titration, formation of Ca- and Ba-EDTA complexes and release of one H<sup>+</sup> ion was taking place and hence decrease in pH from 7.09 to 6.18 was observed. At equivalence point, release of H<sup>+</sup> ion was stopped and sharp increase in pH was observed from 6.18 to 6.77 with further 0.5 mL addition of Na<sub>3</sub>HEDTA (pH 11). Upon subsequent addition of Na<sub>3</sub>HEDTA solution, pH value of solution significantly jumped to 7.08, 7.39 and 7.64. **So sharp equivalence point for the titration was observed at 12.5 mL.**

**Theoretical Calculations:**

**Solution B contains 7.5 mg of CaCO<sub>3</sub> (Theoretical Amount)**

**Solution B contains 9.8 mg of BaCO<sub>3</sub> (Theoretical Amount)**

**1.0 mL      0.01M Na<sub>3</sub>HEDTA    ≡      1.0 mg CaCO<sub>3</sub>      ≡      1.97 mg BaCO<sub>3</sub>**

**Expected equivalence point is (7.5 + 5.0) mL = 12.5 mL Na<sub>3</sub>HEDTA (Theoretical)**

**Solution A contains (17.3 x 5) = 86.5 mg of Total (Ca<sup>+2</sup> + Ba<sup>+2</sup>) content (Theoretical Amount)**

**Experimental Calculations:**

**1000.0 mL    1M Na<sub>3</sub>HEDTA      ≡      100.0 g CaCO<sub>3</sub>      ≡      40.0 g Ca<sup>+2</sup>**

**1000.0 mL    1M Na<sub>3</sub>HEDTA      ≡      197.35 g BaCO<sub>3</sub>      ≡      137.32 g Ba<sup>+2</sup>**

**1000.0 mL 0.01M Na<sub>3</sub>HEDTA ≡ 1.0 g CaCO<sub>3</sub> ≡ 1.97 g BaCO<sub>3</sub>**

**1.0 mL 0.01M Na<sub>3</sub>HEDTA ≡ 1.0 mg CaCO<sub>3</sub> ≡ 1.97 mg BaCO<sub>3</sub>**

**Experimental equivalence point: 12.5 mL, which was utilized to form complexes with 7.5 mg CaCO<sub>3</sub> and 9.8 mg of BaCO<sub>3</sub>**

**Theoretical and experimental equivalence point shows very good agreement**

**43) pH-Metric Estimation of Metal Ions from the mixture of (Ca<sup>+2</sup> and Sr<sup>+2</sup>). Aq. Solution of Ca<sup>+2</sup> and Sr<sup>+2</sup> was prepared by mixing 0.0375 g CaCO<sub>3</sub> and 0.050 g SrCl<sub>2</sub>.6H<sub>2</sub>O respectively. pH of this solution was adjusted to 7 and then it was taken as titrand and Aq. Solution of Na<sub>3</sub>HEDTA (pH 11) was taken as titrant**

0.0375 g CaCO<sub>3</sub> and 0.050 g SrCl<sub>2</sub>.6H<sub>2</sub>O powder was mixed well and then dissolved in 0.3 mL 11.3N HCl. It was transferred to a 250.0 mL standard volumetric flask and diluted up to the mark with water. Solution was shaken well to make it homogeneous (**Solution A**). Then, 50.0 mL of Solution A was transferred to a 100.0 mL beaker. Then, pH electrode was inserted to this solution and pH value was found to be 2.5. pH of this solution was adjusted to 7 by adding 3.0 mL 0.33 M NaOH solution (**Solution B**). Aqueous solution of 0.01M Na<sub>3</sub>HEDTA (pH 11) was prepared by mixing 250.0 mL 0.01M Na<sub>2</sub>H<sub>2</sub>EDTA and 15.0 mL 0.33M NaOH solutions. This solution was filled in 25.0 mL burette as titrant. Then, 0.5 mL 0.01M Na<sub>3</sub>HEDTA was added to Solution B having pH 7. Solution was shaken well with the help of glass rod and then pH reading was measured. Same process was repeated by adding 0.5 mL 0.01M Na<sub>3</sub>HEDTA from burette up to 15.0 mL and pH reading was measured after each 0.5 mL addition of burette solution. Obtained readings and graph are described below.

**Table 32: pH-Metric Titration Readings between Aq. Solutions of (Ca<sup>+2</sup> + Sr<sup>+2</sup>) and Na<sub>3</sub>HEDTA**

| <b>Sr. No.</b> | <b>Volume of 0.01M Na<sub>3</sub>HEDTA (in mL)</b> | <b>pH</b> |
|----------------|----------------------------------------------------|-----------|
| 1              | 0                                                  | 7.06      |

|    |      |      |
|----|------|------|
| 2  | 0.5  | 6.99 |
| 3  | 1    | 6.95 |
| 4  | 1.5  | 6.92 |
| 5  | 2    | 6.89 |
| 6  | 2.5  | 6.86 |
| 7  | 3    | 6.83 |
| 8  | 3.5  | 6.8  |
| 9  | 4    | 6.77 |
| 10 | 4.5  | 6.74 |
| 11 | 5    | 6.72 |
| 12 | 5.5  | 6.68 |
| 13 | 6    | 6.66 |
| 14 | 6.5  | 6.62 |
| 15 | 7    | 6.58 |
| 16 | 7.5  | 6.55 |
| 17 | 8    | 6.52 |
| 18 | 8.5  | 6.48 |
| 19 | 9    | 6.45 |
| 20 | 9.5  | 6.42 |
| 21 | 10   | 6.39 |
| 22 | 10.5 | 6.35 |
| 23 | 11   | 6.32 |
| 24 | 11.5 | 6.29 |
| 25 | 12   | 6.25 |
| 26 | 12.5 | 6.76 |
| 27 | 13   | 7.08 |
| 28 | 13.5 | 7.44 |
| 29 | 14   | 7.82 |
| 30 | 14.5 | 8.37 |
| 31 | 15   | 8.96 |

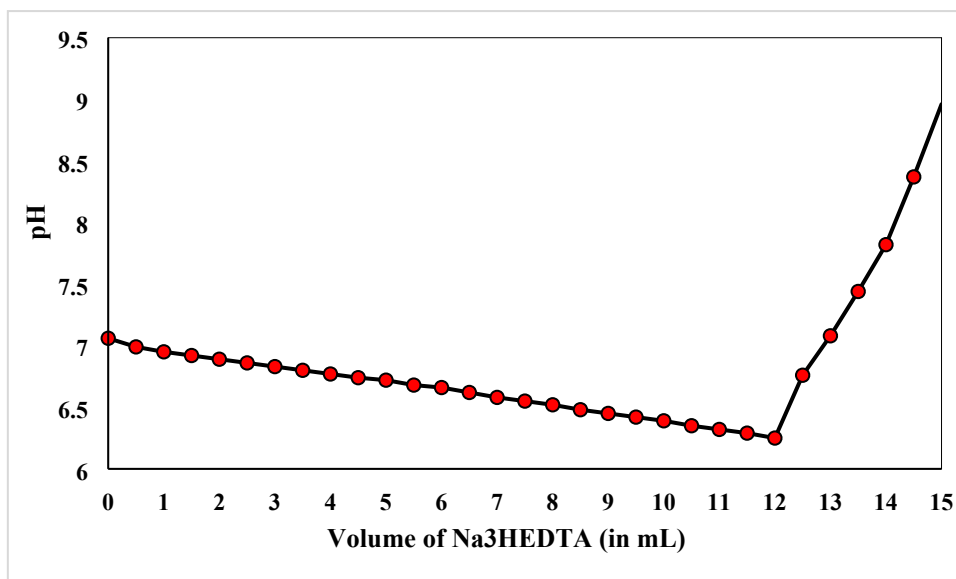

**Figure 15:** Effect of Aq.Na<sub>3</sub>HEDTA Addition on pH of (Ca<sup>+2</sup> + Sr<sup>+2</sup>) Solution

**Observations:** During this titration, formation of Ca- and Sr-EDTA complexes and release of one H<sup>+</sup> ion was taking place and hence decrease in pH from 7.06 to 6.25 was observed. At equivalence point, release of H<sup>+</sup> ion was stopped and sharp increase in pH was observed from 6.25 to 6.76 with further 0.5 mL addition of Na<sub>3</sub>HEDTA (pH 11). Upon subsequent addition of Na<sub>3</sub>HEDTA solution, pH value of solution significantly jumped to 7.08, 7.44 and 7.82. So sharp equivalence point for the titration was observed at 12.0 mL.

**Theoretical Calculations:**

**Solution B contains 7.5 mg of CaCO<sub>3</sub> (Theoretical Amount)**

**Solution B contains 11.0 mg of SrCl<sub>2</sub> (Theoretical Amount)**

**1.0 mL      0.01M Na<sub>3</sub>HEDTA    ≡    1.0 mg CaCO<sub>3</sub>      ≡    2.66 mg SrCl<sub>2</sub>.6H<sub>2</sub>O**

**Expected equivalence point is (7.5 + 4.1) mL = 11.6 mL Na<sub>3</sub>HEDTA (Theoretical)**

**Solution A contains (18.5 x 5) = 92.5 mg of Total (Ca<sup>+2</sup> + Sr<sup>+2</sup>) content (Theoretical Amount)**

**Experimental Calculations:**

**1000.0 mL    1M Na<sub>3</sub>HEDTA      ≡      100.0 g CaCO<sub>3</sub>      ≡      40.0 g Ca<sup>+2</sup>**

**1000.0 mL    1M Na<sub>3</sub>HEDTA      ≡      266.62 g SrCl<sub>2</sub>.6H<sub>2</sub>O    ≡      87.62 g Sr<sup>+2</sup>**

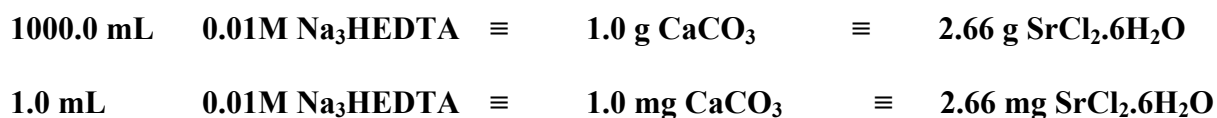

Experimental equivalence point: 12.0 mL, which was utilized to form complexes with 7.5 mg CaCO<sub>3</sub> and 11.0 mg of SrCl<sub>2</sub>·6H<sub>2</sub>O

Percentage Deviation:  $(11.6-12.0)/11.6 \times 100 = 3.44\%$

### Simulated Titration Curve

To derive simulated titration curve, we need  $K_f$  (formation constant for Ca-EDTA complex) and  $\alpha_3$  (fraction of EDTA exist in Na<sub>3</sub>HEDTA form) values.  $K_f$  value for Ca-EDTA complex is  $5 \times 10^{10}$ . To derive  $\alpha_3$  value of Na<sub>3</sub>HEDTA, we need to use following formula.<sup>2</sup>

$$\alpha_3 = \frac{K_{a_1} \cdot K_{a_2} \cdot K_{a_3}}{[H^+]^3 + K_{a_1} \cdot [H^+]^2 + K_{a_1} \cdot K_{a_2} \cdot [H^+] + K_{a_1} \cdot K_{a_2} \cdot K_{a_3}}$$

$K_{a_1}$  for EDTA =  $1.0 \times 10^{-2}$

$K_{a_2}$  for EDTA =  $2.2 \times 10^{-3}$

$K_{a_3}$  for EDTA =  $6.9 \times 10^{-7}$

pH-metric titration performed in experiment 02 is considered for this calculations.

| Sr. No. | Volume of 0.01M Na <sub>3</sub> HEDTA (in mL) | pH   | [H <sup>+</sup> ]    |
|---------|-----------------------------------------------|------|----------------------|
| 1       | 0.0                                           | 7.06 | $8.7 \times 10^{-8}$ |

|    |      |      |                        |
|----|------|------|------------------------|
| 2  | 0.5  | 6.99 | $1.02 \times 10^{-7}$  |
| 3  | 1.0  | 6.94 | $1.14 \times 10^{-7}$  |
| 4  | 1.5  | 6.86 | $1.38 \times 10^{-7}$  |
| 5  | 2.0  | 6.79 | $1.62 \times 10^{-7}$  |
| 6  | 2.5  | 6.73 | $1.86 \times 10^{-7}$  |
| 7  | 3.0  | 6.68 | $2.09 \times 10^{-7}$  |
| 8  | 3.5  | 6.62 | $2.39 \times 10^{-7}$  |
| 9  | 4.0  | 6.56 | $2.75 \times 10^{-7}$  |
| 10 | 4.5  | 6.50 | $3.16 \times 10^{-7}$  |
| 11 | 5.0  | 6.44 | $3.63 \times 10^{-7}$  |
| 12 | 5.5  | 6.39 | $4.07 \times 10^{-7}$  |
| 13 | 6.0  | 6.34 | $4.57 \times 10^{-7}$  |
| 14 | 6.5  | 6.31 | $4.89 \times 10^{-7}$  |
| 15 | 7.0  | 6.28 | $5.24 \times 10^{-7}$  |
| 16 | 7.5  | 6.24 | $5.75 \times 10^{-7}$  |
| 17 | 8.0  | 7.15 | $7.07 \times 10^{-8}$  |
| 18 | 8.5  | 7.79 | $1.62 \times 10^{-8}$  |
| 19 | 9.0  | 8.39 | $4.07 \times 10^{-9}$  |
| 20 | 9.5  | 9.39 | $4.07 \times 10^{-10}$ |
| 21 | 10.0 | 9.70 | $1.99 \times 10^{-10}$ |

By using above data for  $[H^+]$  and  $K_{a1}$ ,  $K_{a2}$ ,  $K_{a3}$ ,  $\alpha_3$  value of  $Na_3HEDTA$  is calculated.

Note: Value of  $\alpha_3$  (fraction of free HEDTA<sup>3-</sup> ions) value will be zero at the beginning of titration.

| Volume of Na <sub>3</sub> HEDTA (in mL) | [H <sup>+</sup> ]        | [H <sup>+</sup> ] <sup>3</sup> | Ka <sub>1</sub> . [H <sup>+</sup> ] <sup>2</sup> | Ka <sub>1</sub> .Ka <sub>2</sub> . [H <sup>+</sup> ] | Ka <sub>1</sub> .Ka <sub>2</sub> .Ka <sub>3</sub> | $\alpha_3$  |
|-----------------------------------------|--------------------------|--------------------------------|--------------------------------------------------|------------------------------------------------------|---------------------------------------------------|-------------|
| 0.0                                     | 8.7 x 10 <sup>-8</sup>   | 6.58503E-22                    | 7.569E-17                                        | 1.914E-12                                            | 1.518E-11                                         | 0.888026956 |
| 0.5                                     | 1.02 x 10 <sup>-7</sup>  | 1.06121E-21                    | 1.0404E-16                                       | 2.244E-12                                            | 1.518E-11                                         | 0.871206919 |
| 1.0                                     | 1.14 x 10 <sup>-7</sup>  | 1.48154E-21                    | 1.2996E-16                                       | 2.508E-12                                            | 1.518E-11                                         | 0.85820265  |
| 1.5                                     | 1.38 x 10 <sup>-7</sup>  | 2.62807E-21                    | 1.9044E-16                                       | 3.036E-12                                            | 1.518E-11                                         | 0.833324621 |
| 2.0                                     | 1.62 x 10 <sup>-7</sup>  | 4.25153E-21                    | 2.6244E-16                                       | 3.564E-12                                            | 1.518E-11                                         | 0.809847816 |
| 2.5                                     | 1.86 x 10 <sup>-7</sup>  | 6.43486E-21                    | 3.4596E-16                                       | 4.092E-12                                            | 1.518E-11                                         | 0.787657093 |
| 3.0                                     | 2.09 x 10 <sup>-7</sup>  | 9.12933E-21                    | 4.3681E-16                                       | 4.598E-12                                            | 1.518E-11                                         | 0.767502515 |
| 3.5                                     | 2.39 x 10 <sup>-7</sup>  | 1.36519E-20                    | 5.7121E-16                                       | 5.258E-12                                            | 1.518E-11                                         | 0.742713365 |
| 4.0                                     | 2.75 x 10 <sup>-7</sup>  | 2.07969E-20                    | 7.5625E-16                                       | 6.05E-12                                             | 1.518E-11                                         | 0.715000436 |
| 4.5                                     | 3.16 x 10 <sup>-7</sup>  | 3.15545E-20                    | 9.9856E-16                                       | 6.952E-12                                            | 1.518E-11                                         | 0.685853746 |
| 5.0                                     | 3.63 x 10 <sup>-7</sup>  | 4.78321E-20                    | 1.31769E-15                                      | 7.986E-12                                            | 1.518E-11                                         | 0.655233384 |
| 5.5                                     | 4.07 x 10 <sup>-7</sup>  | 6.74191E-20                    | 1.65649E-15                                      | 8.954E-12                                            | 1.518E-11                                         | 0.628944979 |
| 6.0                                     | 4.57 x 10 <sup>-7</sup>  | 9.5444E-20                     | 2.08849E-15                                      | 1.0054E-11                                           | 1.518E-11                                         | 0.601519524 |
| 6.5                                     | 4.89 x 10 <sup>-7</sup>  | 1.1693E-19                     | 2.39121E-15                                      | 1.0758E-11                                           | 1.518E-11                                         | 0.58518778  |
| 7.0                                     | 5.24 x 10 <sup>-7</sup>  | 1.43878E-19                    | 2.74576E-15                                      | 1.1528E-11                                           | 1.518E-11                                         | 0.568310599 |
| 7.5                                     | 5.75 x 10 <sup>-7</sup>  | 1.90109E-19                    | 3.30625E-15                                      | 1.265E-11                                            | 1.518E-11                                         | 0.545389749 |
| 8.0                                     | 7.07 x 10 <sup>-8</sup>  | 3.53393E-22                    | 4.99849E-17                                      | 1.5554E-12                                           | 1.518E-11                                         | 0.907056578 |
| 8.5                                     | 1.62 x 10 <sup>-8</sup>  | 4.25153E-24                    | 2.6244E-18                                       | 3.564E-13                                            | 1.518E-11                                         | 0.977060158 |
| 9.0                                     | 4.07 x 10 <sup>-9</sup>  | 6.74191E-26                    | 1.65649E-19                                      | 8.954E-14                                            | 1.518E-11                                         | 0.994136027 |
| 9.5                                     | 4.07 x 10 <sup>-10</sup> | 6.74191E-29                    | 1.65649E-21                                      | 8.954E-15                                            | 1.518E-11                                         | 0.999410493 |
| 10.0                                    | 1.99 x 10 <sup>-10</sup> | 7.8806E-30                     | 3.9601E-22                                       | 4.378E-15                                            | 1.518E-11                                         | 0.999711677 |

Now, we have to find out  $[Ca^{+2}]$  ions considering three situations i.e. 1) Before equivalence point, 2) At equivalence point, 3) After equivalence point (For all detailed calculations, please follow reference 1

Initially, we have taken 50.0 mL 0.0015M  $CaCO_3$ . It contains total 0.075 mmoles of  $CaCO_3$ . To this, 0.5 mL 0.01M  $Na_3HEDTA$  was added. It contains 0.005 mmoles of  $Na_3HEDTA$ . It will react with 0.005 mmoles of  $CaCO_3$  and will form complex.

| Sr. No. | Volume of $Na_3HEDTA$ Added (in mL) | Total Volume (in mL) | $[Ca^{+2}]$ (M) | pCa         |
|---------|-------------------------------------|----------------------|-----------------|-------------|
| 1       | 0.0                                 | 50.0                 | 0.00150         | 2.823908741 |
| 2       | 0.5                                 | 50.5                 | 0.00138         | 2.860120914 |
| 3       | 0.5                                 | 51.0                 | 0.001269        | 2.896196279 |
| 4       | 0.5                                 | 51.5                 | 0.001159        | 2.935542011 |
| 5       | 0.5                                 | 52.0                 | 0.001051        | 2.978810701 |
| 6       | 0.5                                 | 52.5                 | 0.000946        | 3.024108864 |
| 7       | 0.5                                 | 53.0                 | 0.000843        | 3.074172425 |
| 8       | 0.5                                 | 53.5                 | 0.000741        | 3.130181792 |
| 9       | 0.5                                 | 54.0                 | 0.0006424       | 3.192464972 |
| 10      | 0.5                                 | 54.5                 | 0.0005447       | 3.2644011   |
| 11      | 0.5                                 | 55.0                 | 0.0004489       | 3.348721986 |
| 12      | 0.5                                 | 55.5                 | 0.0003547       | 3.450996738 |



|    |     |      |                         |             |
|----|-----|------|-------------------------|-------------|
| 13 | 0.5 | 56.0 | 0.0002623               | 3.581698709 |
| 14 | 0.5 | 56.5 | 0.0001715               | 3.76700389  |
| 15 | 0.5 | 57.0 | 0.00008228              | 4.084705717 |
| 16 | 0.5 | 57.5 | $2.18 \times 10^{-7}$   | 6.661543506 |
| 17 | 0.5 | 58.0 | $3.31 \times 10^{-10}$  | 9.480172006 |
| 18 | 0.5 | 58.5 | $1.541 \times 10^{-10}$ | 9.812479279 |
| 19 | 0.5 | 59.0 | $1.008 \times 10^{-10}$ | 9.996539468 |
| 20 | 0.5 | 59.5 | $7.505 \times 10^{-11}$ | 10.12465509 |
| 21 | 0.5 | 60.0 | $6.003 \times 10^{-11}$ | 10.22163889 |

**Simulated Titration Curve**

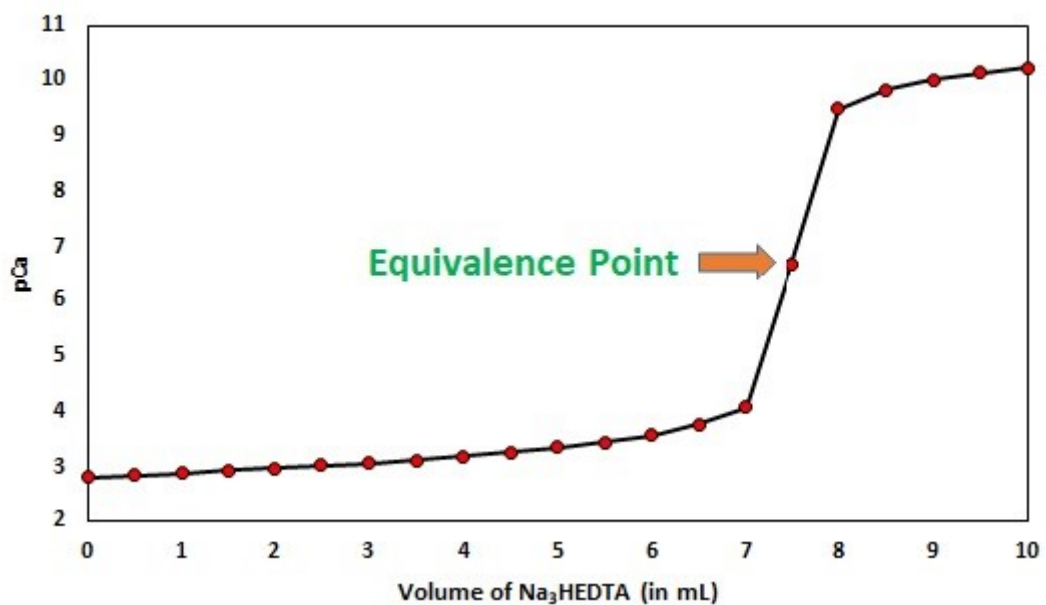

## Uncertainty Calculation for pH-Metric Analysis

| Sr. No. | Name of Equipment/Glassware   | Uncertainty Involved | No. of Times Equipment/Glassware Used in Experiment |
|---------|-------------------------------|----------------------|-----------------------------------------------------|
| 01      | Digital balance               | 0.00005 g            | Three                                               |
| 02      | Burette (25.0 mL)             | 0.05 mL              | One                                                 |
| 03      | Pipette (25.0 mL)             | 0.03 mL              | Three                                               |
| 04      | Measuring Cylinder (250.0 mL) | 1.0 mL               | One                                                 |
| 05      | SMF (250.0 mL)                | 0.1 mL               | Two                                                 |

Uncertainty involved with pH measurement: 0.01

## Uncertainty Calculation for Entries in the Table 1 of Manuscript

| Entry No. | Uncertainty arise from digital balance | Uncertainty arise from burette | Uncertainty arise from pipette | Uncertainty arise from measuring cylinder | Uncertainty arise from SMF | Total % Uncertainty |
|-----------|----------------------------------------|--------------------------------|--------------------------------|-------------------------------------------|----------------------------|---------------------|
| 1         | 0.16 %                                 | 1.33 %                         | 0.36 %                         | 0.40 %                                    | 0.08 %                     | 2.33 %              |
| 2         | 0.10 %                                 | 0.66 %                         | 0.36 %                         | 0.40 %                                    | 0.08 %                     | 1.60 %              |
| 3         | 0.07 %                                 | 0.44 %                         | 0.36 %                         | 0.40 %                                    | 0.08 %                     | 1.35 %              |

### Uncertainty Calculation for Entries in the Table 2 of Manuscript

| Entry No. | Uncertainty arise from digital balance | Uncertainty arise from burette | Uncertainty arise from pipette | Uncertainty arise from measuring cylinder | Uncertainty arise from SMF | Total % Uncertainty |
|-----------|----------------------------------------|--------------------------------|--------------------------------|-------------------------------------------|----------------------------|---------------------|
| 1         | 0.14 %                                 | 1.11 %                         | 0.36 %                         | 0.40 %                                    | 0.08 %                     | 2.09 %              |
| 2         | 0.13 %                                 | 1.00 %                         | 0.36 %                         | 0.40 %                                    | 0.08 %                     | 1.97 %              |
| 3         | 0.15 %                                 | 1.17 %                         | 0.36 %                         | 0.40 %                                    | 0.08 %                     | 2.16 %              |
| 4         | 0.13 %                                 | 1.00 %                         | 0.36 %                         | 0.40 %                                    | 0.08 %                     | 1.97 %              |

### Uncertainty Calculation for Entries in the Table 3 of Manuscript

| Entry No. | Uncertainty arise from digital balance | Uncertainty arise from burette | Uncertainty arise from pipette | Uncertainty arise from measuring cylinder | Uncertainty arise from SMF | Total % Uncertainty |
|-----------|----------------------------------------|--------------------------------|--------------------------------|-------------------------------------------|----------------------------|---------------------|
| 1         | 0.13 %                                 | 0.93 %                         | 0.36 %                         | 0.40 %                                    | 0.08 %                     | 1.90 %              |
| 2         | 0.15 %                                 | 1.08 %                         | 0.36 %                         | 0.40 %                                    | 0.08 %                     | 2.07 %              |
| 3         | 0.13 %                                 | 0.95 %                         | 0.36 %                         | 0.40 %                                    | 0.08 %                     | 1.92 %              |
| 4         | 0.15 %                                 | 1.12 %                         | 0.36 %                         | 0.40 %                                    | 0.08 %                     | 2.11 %              |

## References:

- 1) G. H. Jeffery, J. Bassett, J. Mendham, R.C. Denney, *Vogel's Textbook of Quantitative Chemical Analysis (Fifth Edition)*, Longan Scientific and Technical Publisher, New York, **1989**, Page No. 551-553
- 2) G. D. Christian, P. K. Dasgupta, K. A. Schug, *Analytical Chemistry (Seventh Edition)*, John Wiley & Sons, River Street, Hoboken, **2014**, Page No. 326-333
